# Supplementary material for: Asymmetric total synthesis of martinelline and martinellic acid
Source: Royal Society of Chemistry journal article supplement (doi:10.1039/b611121a), 2006-11-01

Fri Nov 11 11:03:10 2005  
C:\Mv\Documents\人7-1\NMR.AL4004

DATEIM  
DFILE  
DENUMC  
EXMOD  
EXMOD  
OFF  
OSSET  
OSSET  
POINT  
FREQUL  
SCANS  
ACQTIM  
PD  
PWI  
IRN  
OTEMP  
SLVNT  
EXREF  
BF  
RGAIN

300.05 MHz  
124.00 K-Hz  
1050.00 Hz  
32798  
7993.60 Hz  
10  
4.063 sec  
2.9010 sec  
5.90 usec  
24.6 c  
000L3  
0.00 ppm  
0.12 Hz  
6

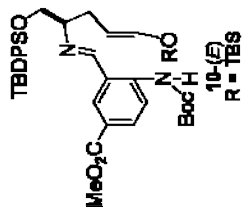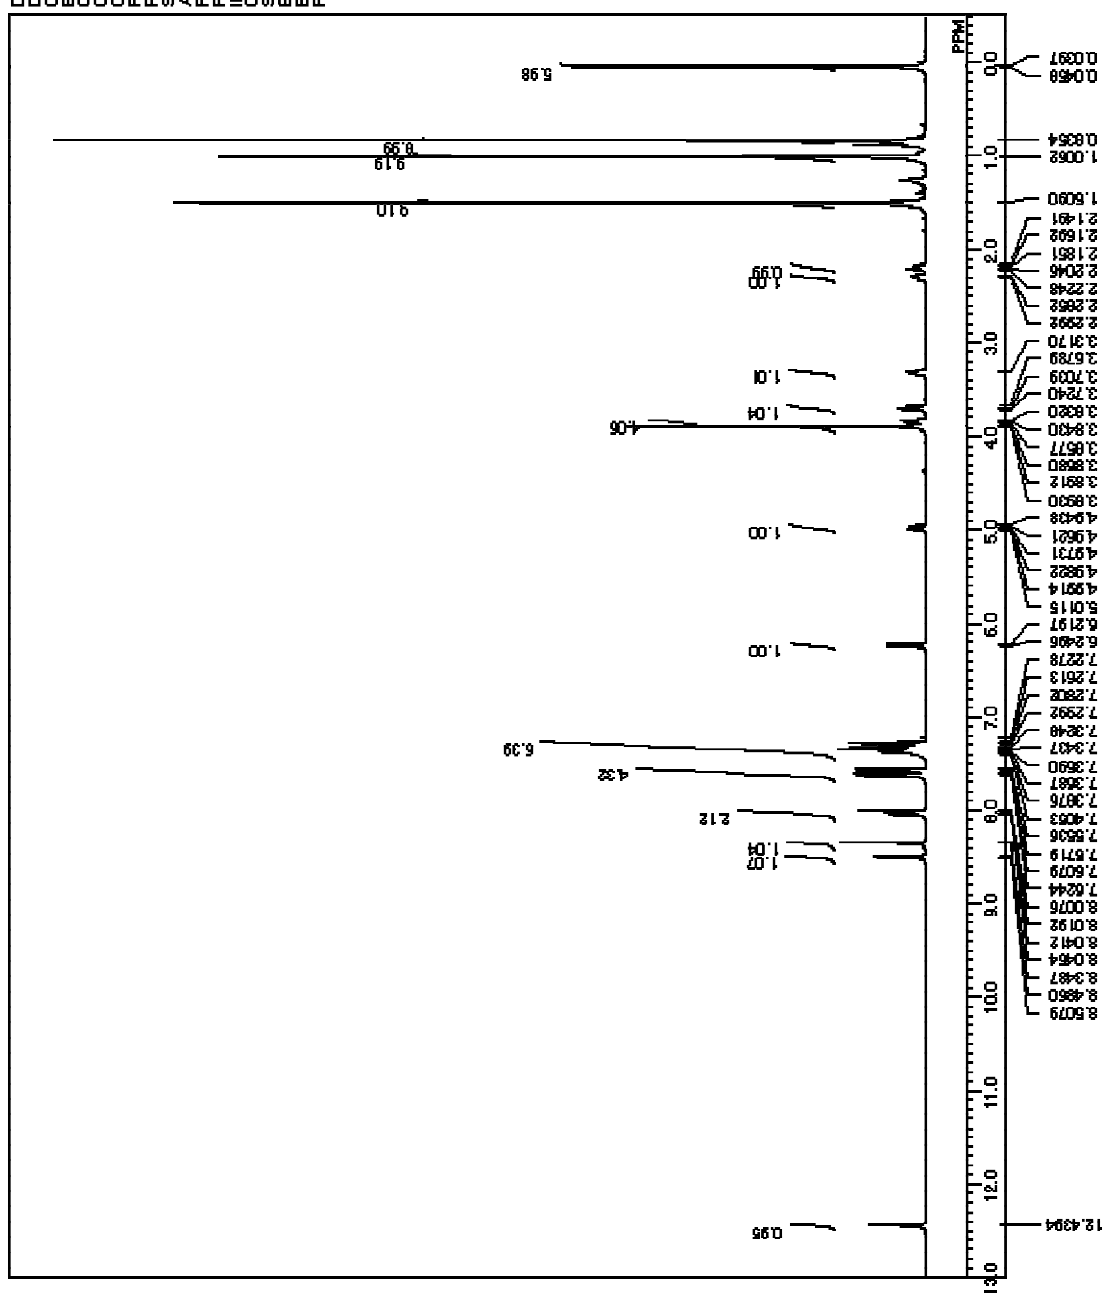

Fri Nov 11 11:36:26 2005  
C:\Mwv\Documents\人7-1\JNMFR.AL400M

DATEIM  
DFILE  
DENUC  
EXMDD  
OFFR  
OBSST  
OBSST  
POINT  
FREQUL  
SCANS  
ACQTIM  
PD  
PWI  
IRN  
OTEMP  
SLVNT  
EXREF  
BF  
RGAIN

100.40 MHz  
126.00 KHz  
10600.00 Hz  
23708  
27173.90 Hz  
600  
1.2009 sec  
1.7940 sec  
5.90 usec  
23.9 c  
CDDL3  
77.00 ppm  
0.12 Hz  
21

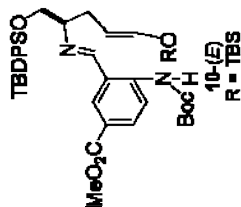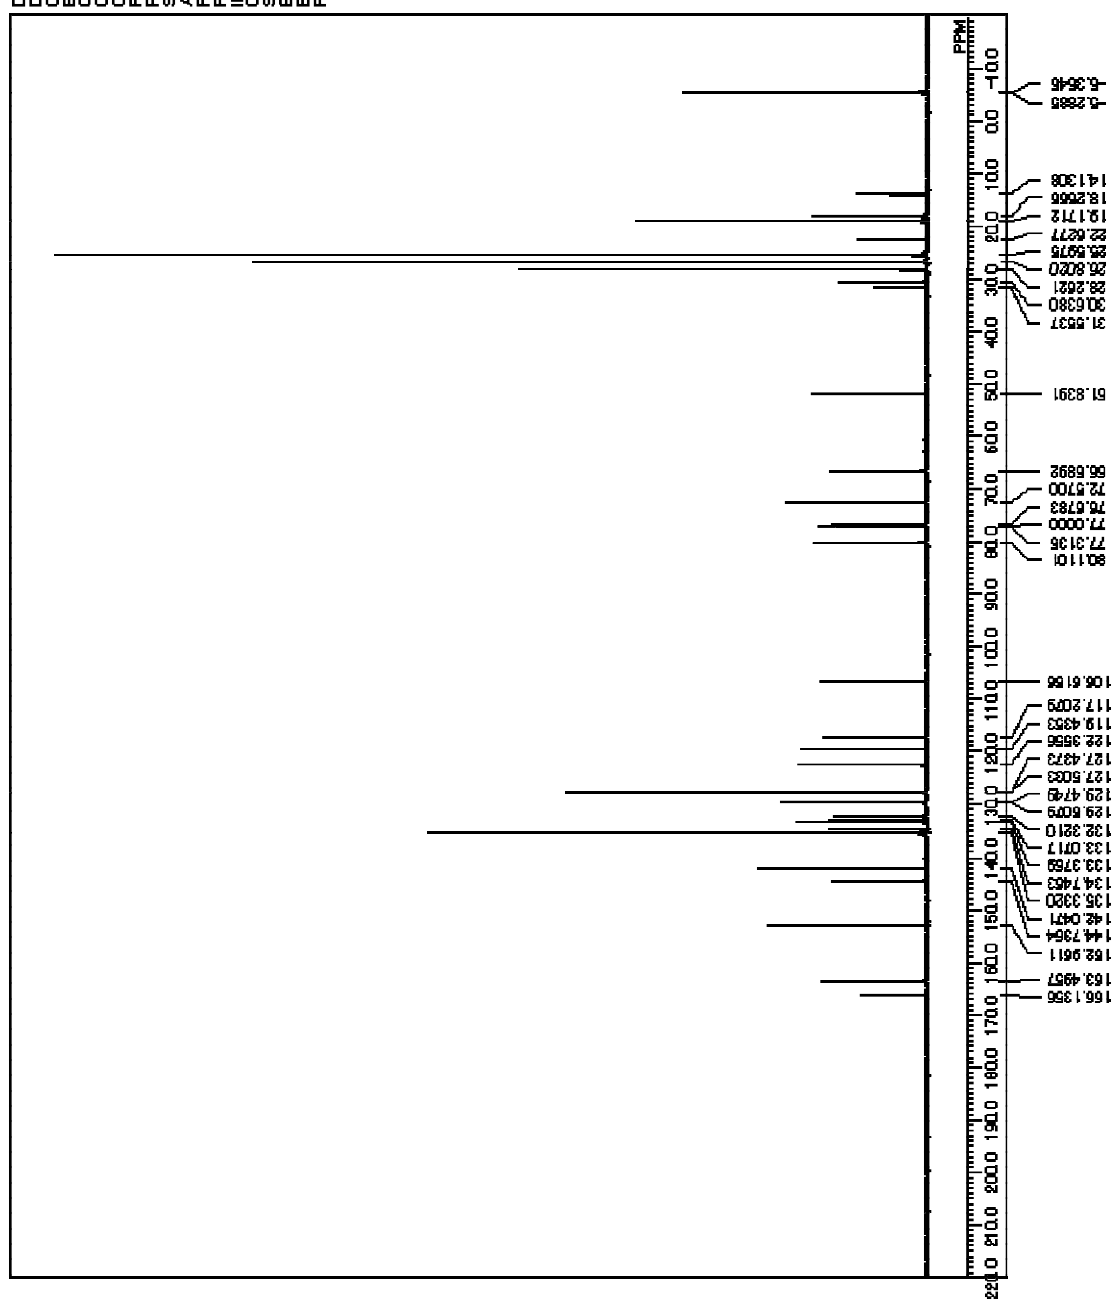

Fri Nov 11 14:31:23 2005  
 C:\My Documents\人7-1\NMR\_AL400M

DATIM  
 DFILE  
 DENUC  
 EXMDD  
 OFR  
 ORES  
 ORES  
 POINT  
 FREQU  
 SCANS  
 ACQTIM  
 PD  
 PWD  
 IRN  
 OTEMP  
 SLYNT  
 EXREF  
 BF  
 RGAIN

304.65 MHz  
 124.00 KHz  
 1050.00 Hz  
 23798  
 7993.60 Hz  
 10  
 4.063 sec  
 2.9010 sec  
 5.90 usec  
 24.2 c  
 000L3  
 0.00 ppm  
 0.46 Hz  
 9

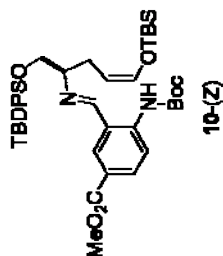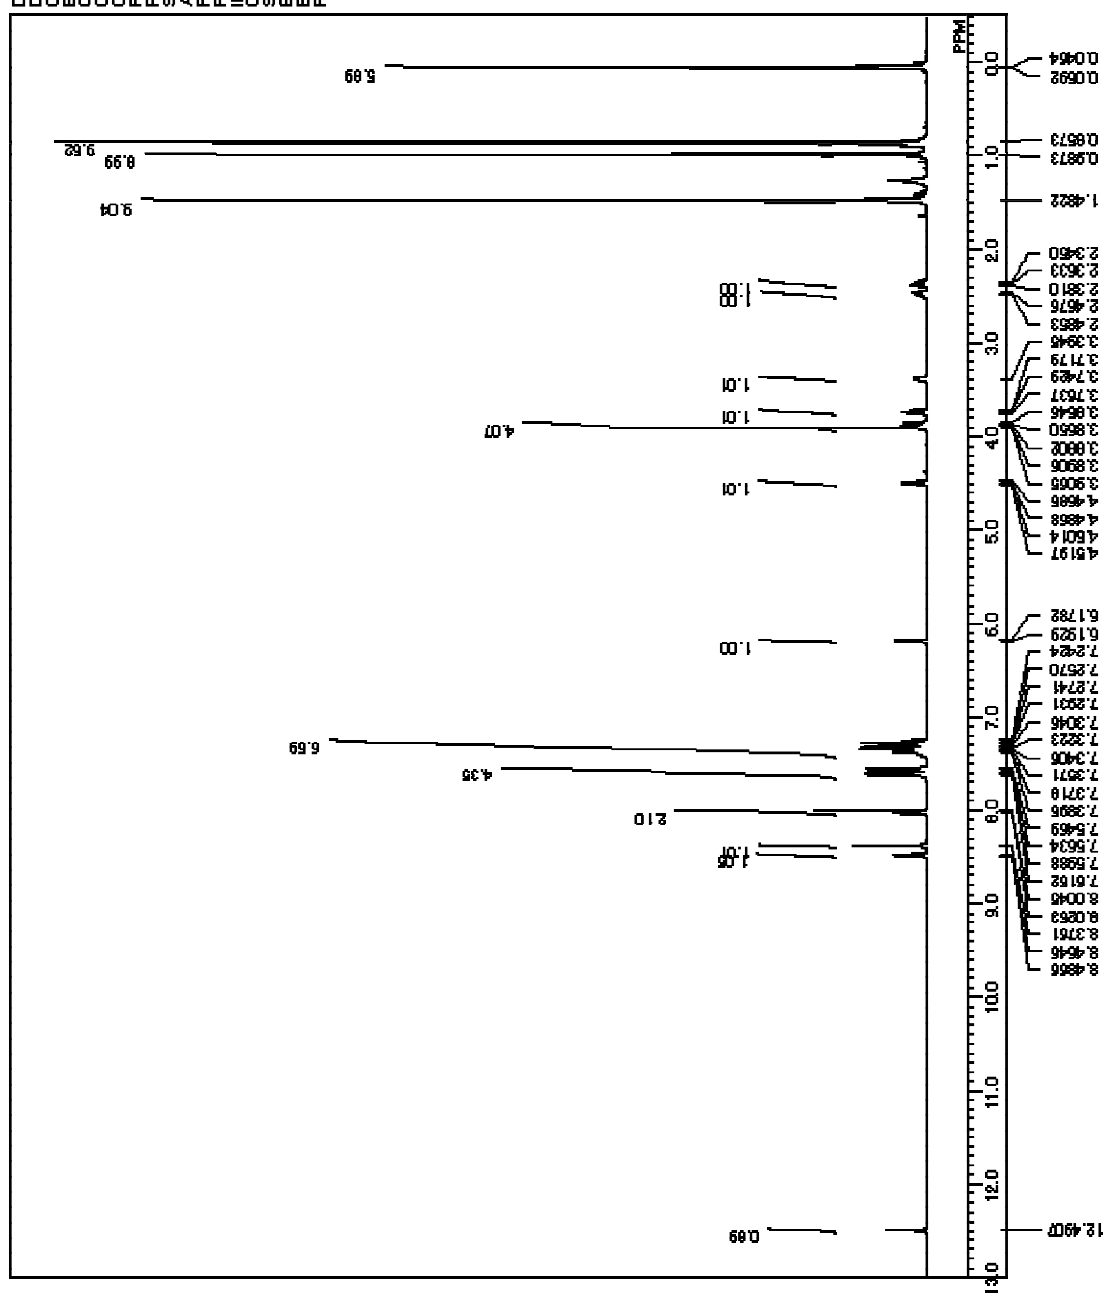

Fri Nov 11 15:05:08 2005  
 C:\Mv\Documents\人7-1\NMR\_AL400M

DATE\_ 11  
 TIME\_ 15:05:08  
 FILE\_ AL400M  
 PROC\_ 1  
 P1\_ 1.00  
 P2\_ 0.00  
 P3\_ 0.00  
 P4\_ 0.00  
 P5\_ 0.00  
 P6\_ 0.00  
 P7\_ 0.00  
 P8\_ 0.00  
 P9\_ 0.00  
 P10\_ 0.00  
 P11\_ 0.00  
 P12\_ 0.00  
 P13\_ 0.00  
 P14\_ 0.00  
 P15\_ 0.00  
 P16\_ 0.00  
 P17\_ 0.00  
 P18\_ 0.00  
 P19\_ 0.00  
 P20\_ 0.00  
 P21\_ 0.00  
 P22\_ 0.00  
 P23\_ 0.00  
 P24\_ 0.00  
 P25\_ 0.00  
 P26\_ 0.00  
 P27\_ 0.00  
 P28\_ 0.00  
 P29\_ 0.00  
 P30\_ 0.00  
 P31\_ 0.00  
 P32\_ 0.00  
 P33\_ 0.00  
 P34\_ 0.00  
 P35\_ 0.00  
 P36\_ 0.00  
 P37\_ 0.00  
 P38\_ 0.00  
 P39\_ 0.00  
 P40\_ 0.00  
 P41\_ 0.00  
 P42\_ 0.00  
 P43\_ 0.00  
 P44\_ 0.00  
 P45\_ 0.00  
 P46\_ 0.00  
 P47\_ 0.00  
 P48\_ 0.00  
 P49\_ 0.00  
 P50\_ 0.00  
 P51\_ 0.00  
 P52\_ 0.00  
 P53\_ 0.00  
 P54\_ 0.00  
 P55\_ 0.00  
 P56\_ 0.00  
 P57\_ 0.00  
 P58\_ 0.00  
 P59\_ 0.00  
 P60\_ 0.00  
 P61\_ 0.00  
 P62\_ 0.00  
 P63\_ 0.00  
 P64\_ 0.00  
 P65\_ 0.00  
 P66\_ 0.00  
 P67\_ 0.00  
 P68\_ 0.00  
 P69\_ 0.00  
 P70\_ 0.00  
 P71\_ 0.00  
 P72\_ 0.00  
 P73\_ 0.00  
 P74\_ 0.00  
 P75\_ 0.00  
 P76\_ 0.00  
 P77\_ 0.00  
 P78\_ 0.00  
 P79\_ 0.00  
 P80\_ 0.00  
 P81\_ 0.00  
 P82\_ 0.00  
 P83\_ 0.00  
 P84\_ 0.00  
 P85\_ 0.00  
 P86\_ 0.00  
 P87\_ 0.00  
 P88\_ 0.00  
 P89\_ 0.00  
 P90\_ 0.00  
 P91\_ 0.00  
 P92\_ 0.00  
 P93\_ 0.00  
 P94\_ 0.00  
 P95\_ 0.00  
 P96\_ 0.00  
 P97\_ 0.00  
 P98\_ 0.00  
 P99\_ 0.00  
 P100\_ 0.00

100.40 MHz  
 126.00 KHz  
 10600.00 Hz  
 32768  
 27173.90 Hz  
 322  
 1.2059 sec  
 1.7940 sec  
 5.90 usec  
 23.9 c  
 000L3  
 77.00 ppm  
 0.12 Hz  
 22

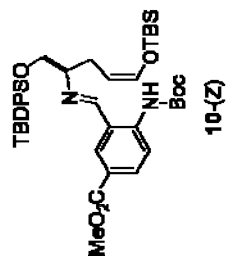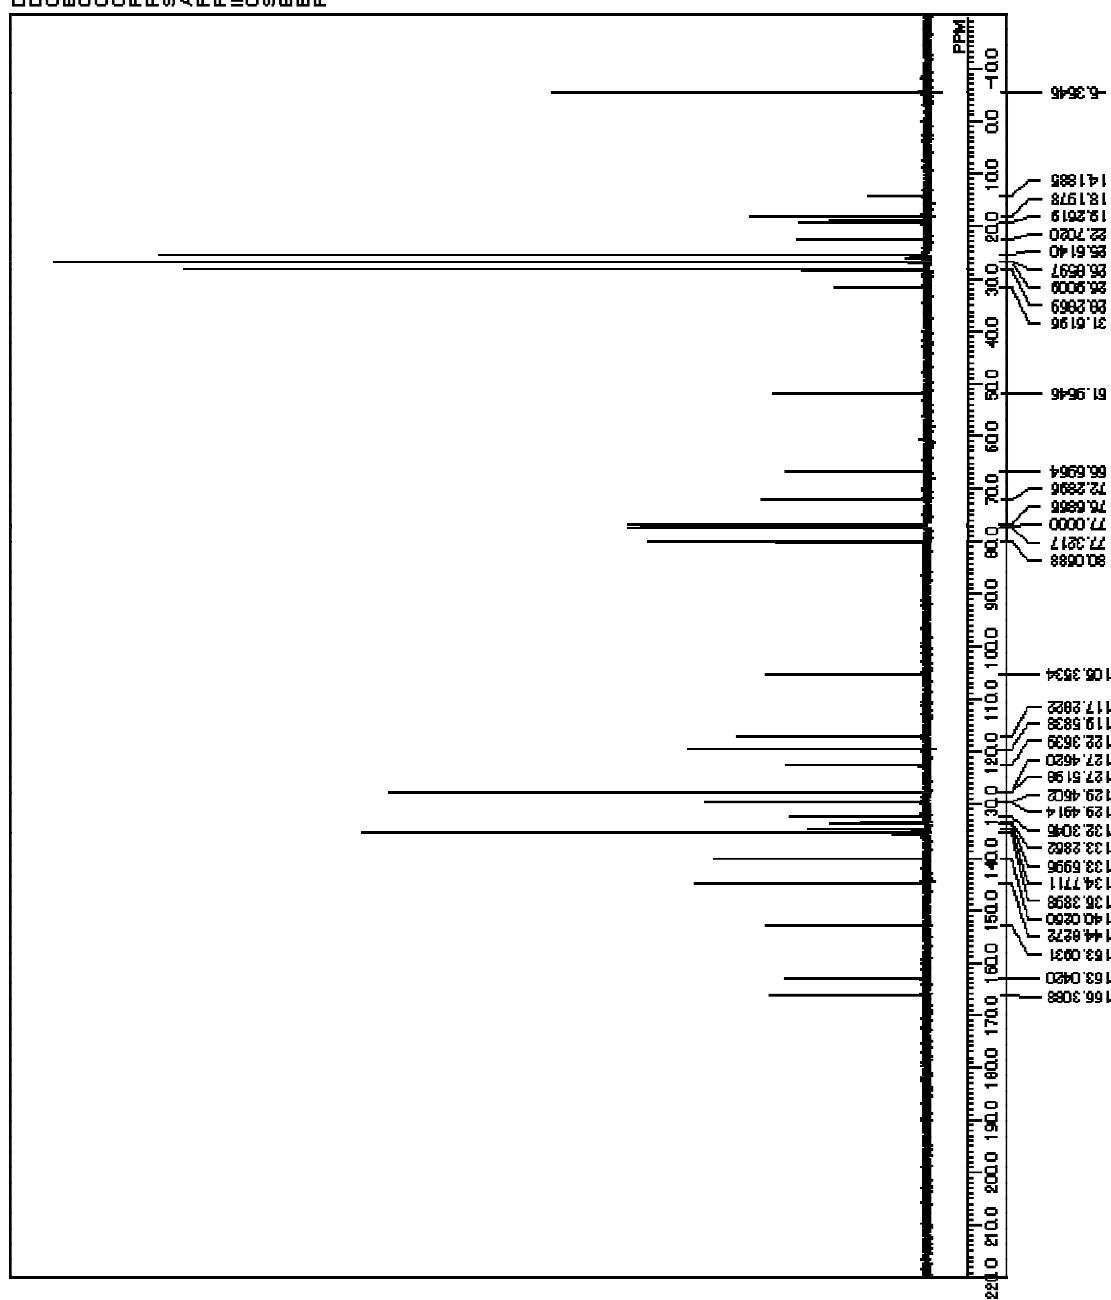

Tue Nov 15 08:36:36 2005  
C:\Mv\Documents\人7\7-1\JUNMR\_AL400M

DATEIM  
DFILE  
DENUMC  
EXMOD  
EXMOD  
OFF  
ORBIT  
ORBIT  
POINT  
PREGU  
SCANS  
ACQTIM  
PD  
PWI  
IRN  
OTEMP  
SLVNT  
EXREF  
BF  
RGAIN

364.65 MHz  
124.00 KHz  
10500.00 Hz  
23798  
7993.60 Hz  
10  
4.063 sec  
2.9010 sec  
5.90 usec  
23.8 c  
CDCL3  
0.00 ppm  
0.12 Hz  
12

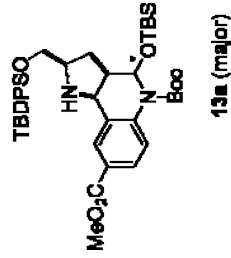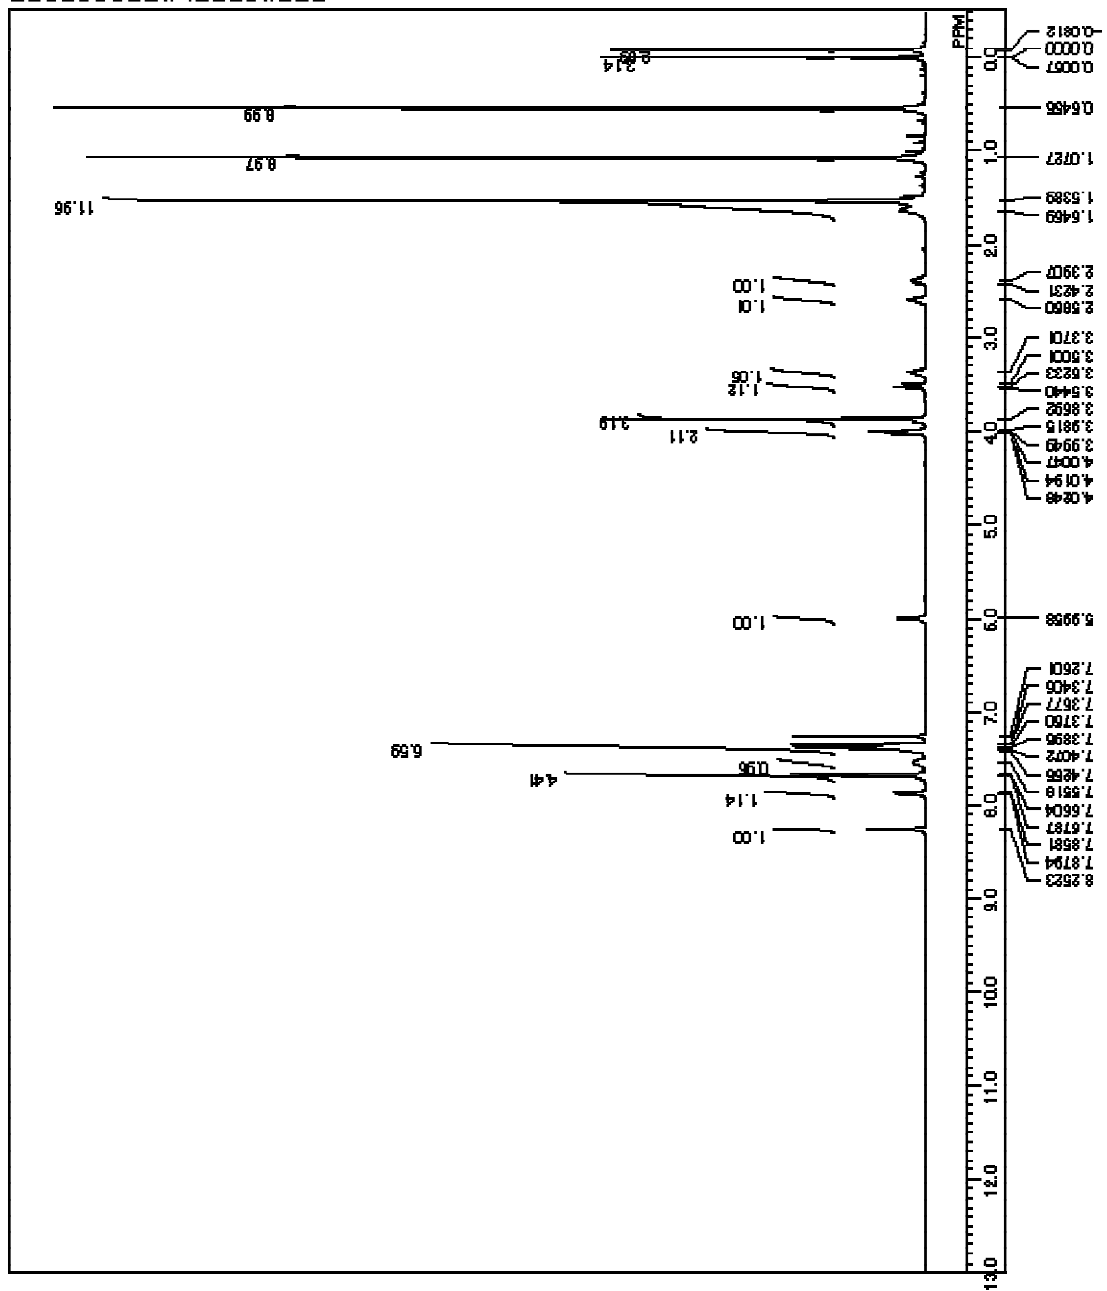

Sat Nov 27 01:26:55 2004  
 C:\Mwv\Documents\人7-1\JNMFR.AL400M

DATIM  
 DFILE  
 DENUC  
 EXMOLD  
 OFR  
 OSET  
 OFET  
 POINT  
 FREQU  
 SCANS  
 ACQTIM  
 PD  
 PWD  
 IRN  
 OTEMP  
 SLYNT  
 EXREF  
 BF  
 REGAIN

100.40 MHz  
 126.00 KHz  
 10600.00 Hz  
 23708  
 27173.80 Hz  
 1206  
 1.2069 sec  
 1.7940 sec  
 5.50 usec  
 22.1 c  
 CDDLS  
 77.00 ppm  
 0.12 Hz  
 23

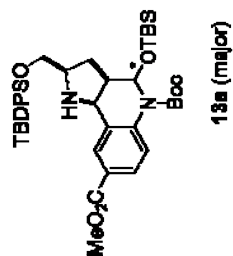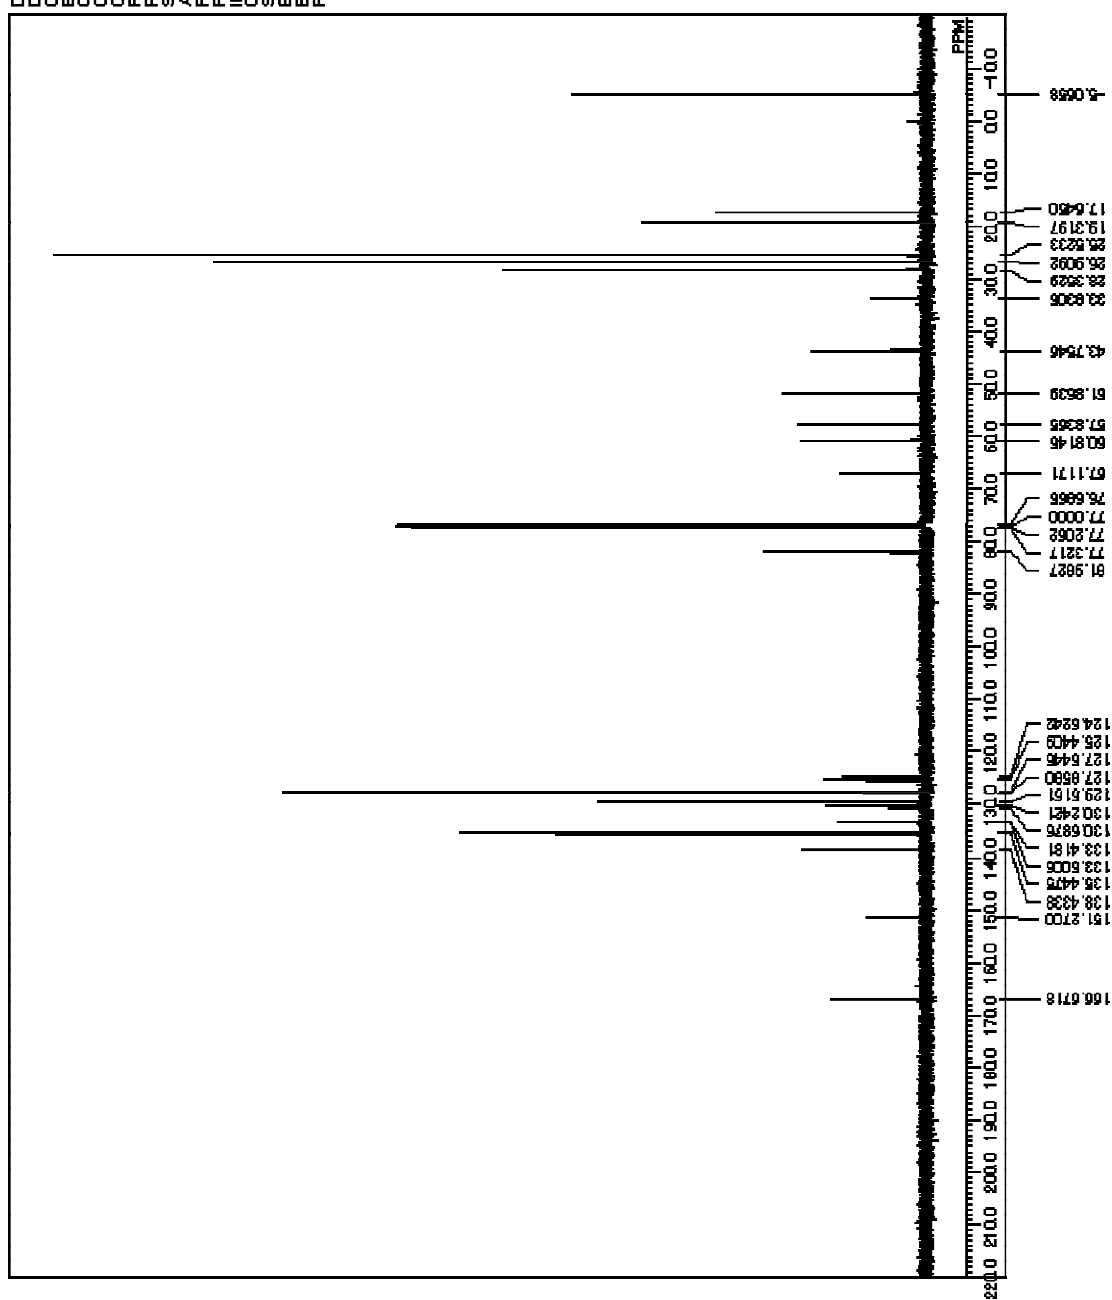

Thu Jun 23 10:28:36 2005  
 C:\Mv\Documents\177\1\NMR.AL4004  
 1H  
 NMR  
 300.65 MHz  
 124.00 K-Hz  
 10500.00 Hz  
 22708  
 8000.00 Hz  
 32  
 4.060 sec  
 2.9010 sec  
 5.90 usec  
 24.6 c  
 CDD13  
 0.00 ppm  
 0.12 Hz  
 9  
 DATIM  
 DFILE  
 DENUC  
 EXMDD  
 OFR  
 ORES  
 ORFIN  
 POINT  
 FREQU  
 SCANS  
 ACQTIM  
 PD  
 PWT  
 IRN  
 OTEMP  
 SLYNT  
 EXREF  
 BF  
 RGAIN

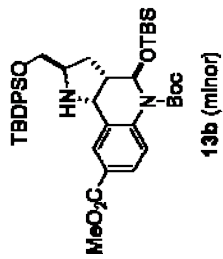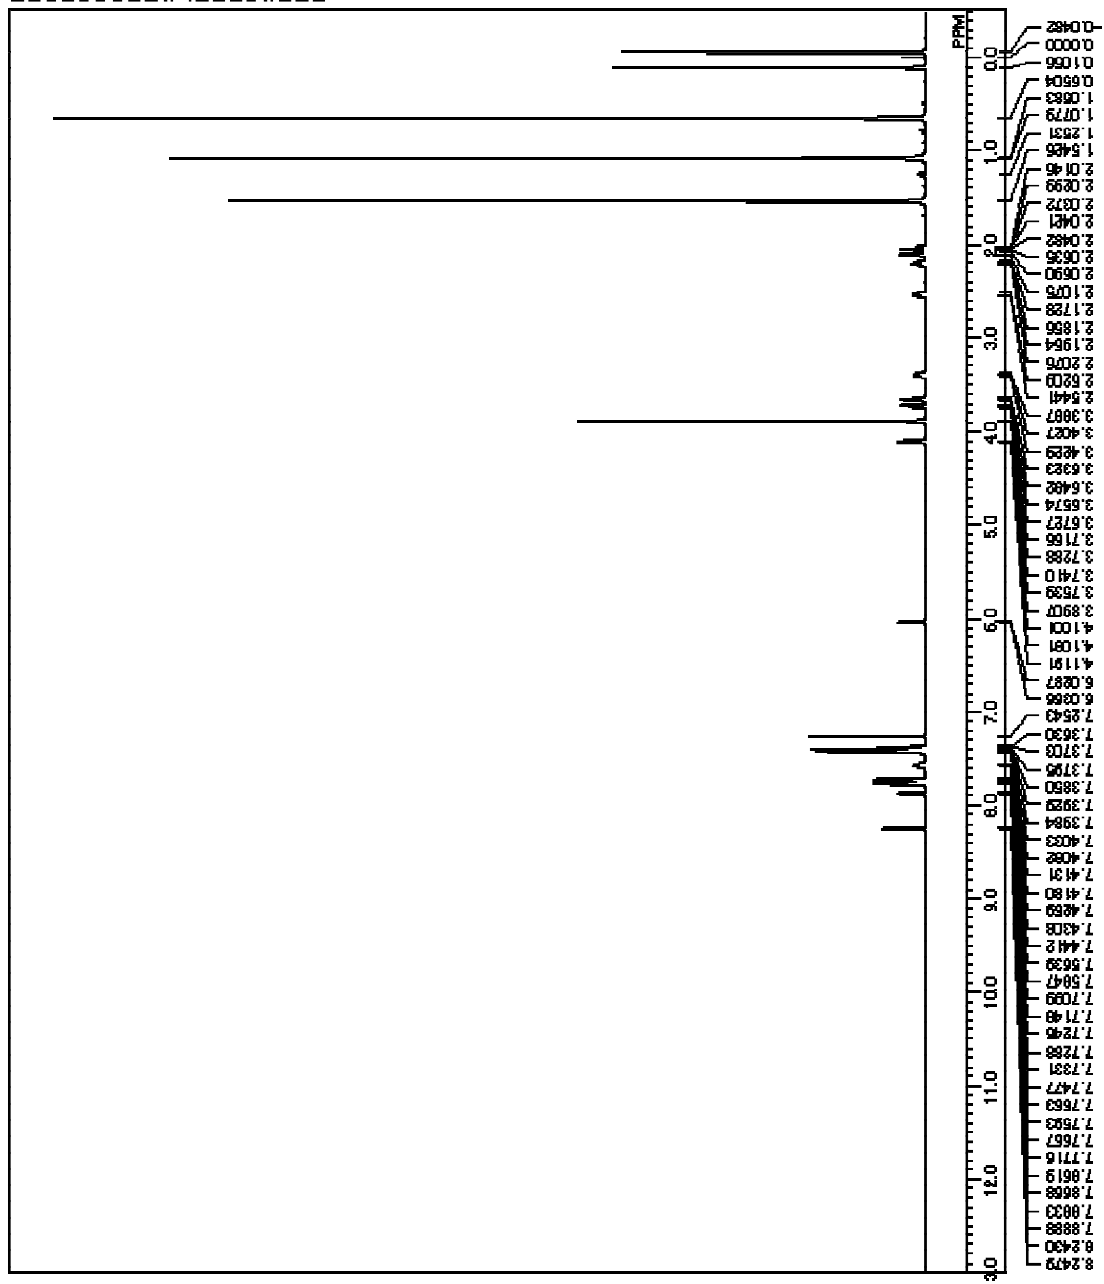





台版製劑化學 231 NON(R.T.)

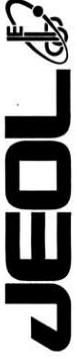

----- PROCESSING PARAMETERS -----  
dc\_balance (Hz) = 0.01(s)  
freq\_offset3 (0(N) ; 80(N) ; 100(N)  
zfc = 1 ; TRUE  
machinephase  
ppm

----- ACQUISITION PARAMETERS -----  
Derived from: chujuan11.1  
Name = chujuan11.1  
Author = delin  
Sample\_ID = NON(R.T.)  
Creation Date = 10-JAN-2005 21:36:38  
Revision Date = 11-JAN-2005 11:42:58  
Spec Site = ECA 606EL  
Spec Type = DRZT2 HMR  
Name = NON(R.T.)  
Dimensions = 38x28  
Dia Title = 38x28  
Dia Units = [ppm]  
Freq = 500.136363636 [MHz]  
X\_acq\_offset = 8.0226064(s)  
X\_domain = 18 ; 170593168 [Hz]  
X\_offset = 51ppm  
X\_points = 65536  
X\_resolution = 0.12466331 [Hz]  
X\_rfq = 0.1595346 [kHz]  
X\_rf\_freq = 594.370593168 [MHz]  
X\_rf\_domain = 38 [ppm]  
X\_rf\_offset = 51ppm  
X\_rf\_domain = 38 [ppm]  
Mod\_return = 1  
Total\_scans = 40  
X\_90\_width = 13.8 [us]  
X\_eq\_time = 8.0226064(s)  
X\_pulse = 3.5 [dB]  
X\_pulse = 6.5 [us]  
X\_pulse = 6.5 [us]  
X\_pulse = OFF  
Pulprg = 11Wave  
Pulprg2 = 11Wave  
Relaxation\_delay = 5 [s]  
Relaxation\_delay = 5 [s]  
Experiment\_time = single pulse.ex2  
Revr\_gain = 46 [umpeck-d3]  
Temp\_set = 24.3 [degC]  
Temp\_mon = 24.3 [degC]  
PROC\_FID = 2022

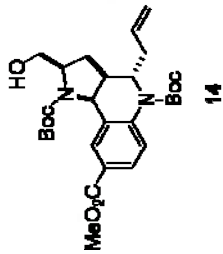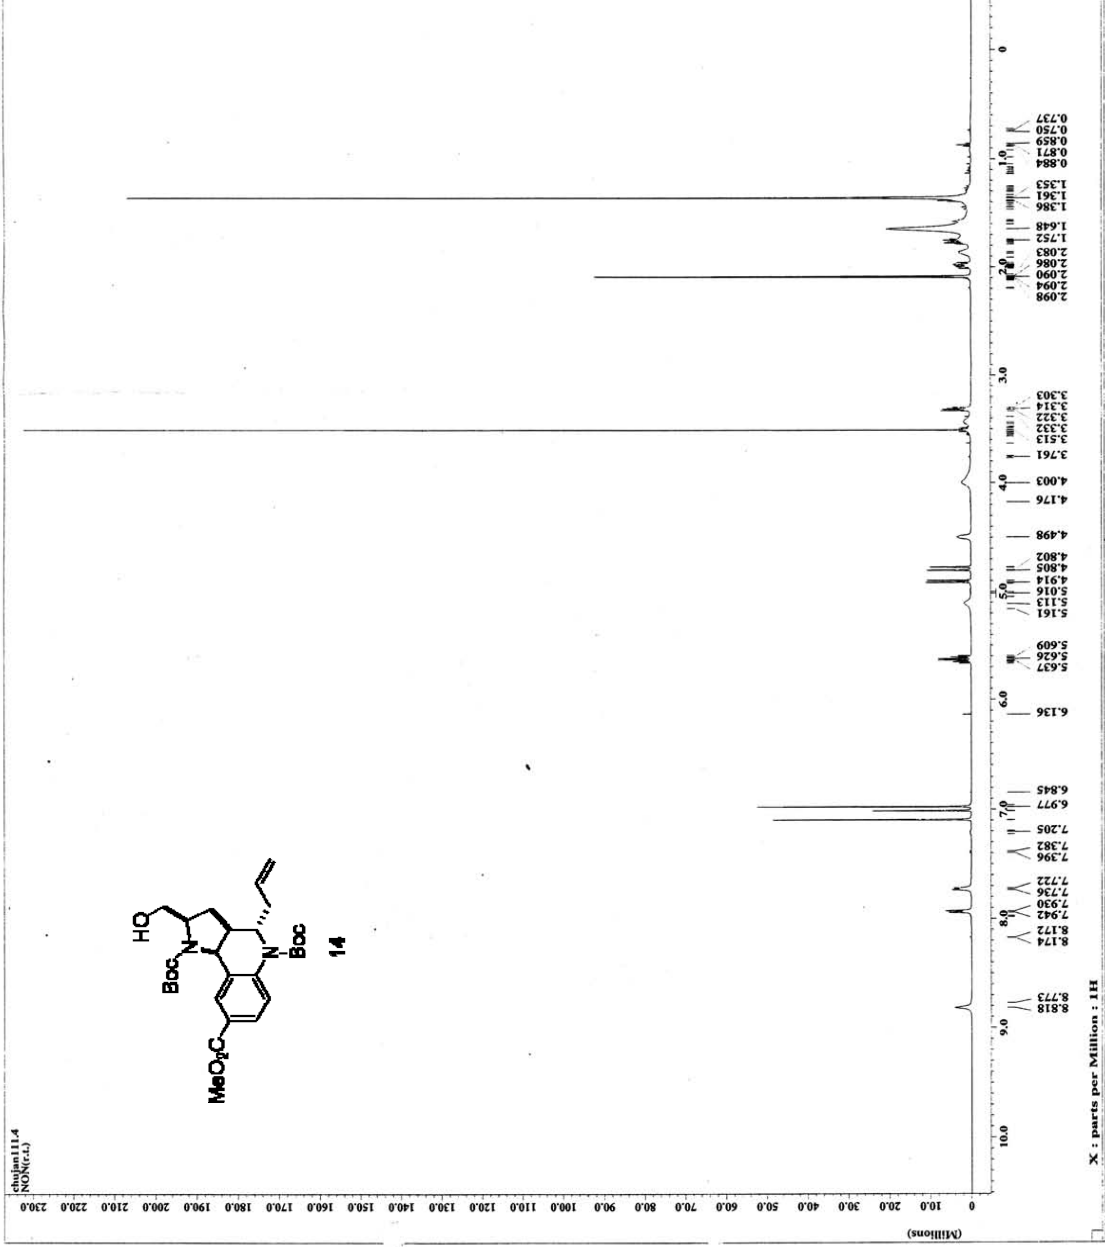

14

X : parts per Million : 1H

NON(100°C) 231 NON (100°C)

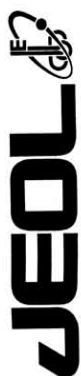

----- PROCESSING PARAMETERS -----  
 dc\_balance (Hz) : 0.0 (s)  
 frequency (MHz) : 500.136 (s)  
 temperature (°C) : 0 (s) : 80 (h) : 100 (h)  
 acquisition : 231 NON  
 machine : JEOL  
 machine phase :  
 Reference : 3.542 (ppm) : 3.562 (ppm)

----- ACQUISITION PARAMETERS -----  
 Derived from: chujan27.1  
 File Name : chujan27.4  
 Sample ID :  
 Name : NON(100°C)  
 Creation Date : 12-JAN-2005 18:14:47  
 Revision Date : 13-JAN-2005 09:14:10  
 Spec Site : KCA 600SL  
 Spec Type : DELTA2 NMR  
 Data Format : 1D COMPLEX  
 Data Name :  
 Data Title :  
 Data Path :  
 Data File :  
 Data Date :  
 Data Time :  
 Field Strength : 13.5540599 (T) (500.136 MHz)  
 X\_pos : 18.01868 (mm)  
 X\_rot : 57.000 (deg)  
 X\_flip : 65.536 (deg)  
 X\_resolution : 0.12466331 (Hz)  
 X\_sweep : 8.1699346 (kHz)  
 Irr\_freq : 594.17058168 (MHz)  
 Irr\_offset : 31 (ppm)  
 Trf\_freq : 594.17058168 (MHz)  
 Mod\_freq : 1 (ppm)  
 Mod\_retun : 8  
 Scans : 8  
 Total\_scans : 8  
 X\_acq : 13.5 (sec)  
 X\_acq\_time : 8.0216064 (s)  
 X\_pulse : 45 (deg)  
 X\_pulse\_width : 6.9 (um)  
 X\_pulse\_mode : Off  
 X\_phase : Off  
 Data\_Preset : FALSI  
 Data\_Acquisition :  
 Relaxation\_Delay : 5 (s)  
 Repetition\_Time : 11.0216064 (s)  
 Recvr\_gain : 18  
 Solvent : CDCl3  
 Spin\_gat : 100 (deg)  
 Spin\_gat : 16 (Hz)  
 Probe\_id : 2092

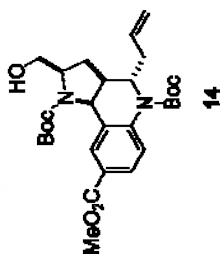

chujan27.4  
 NON(100°C)

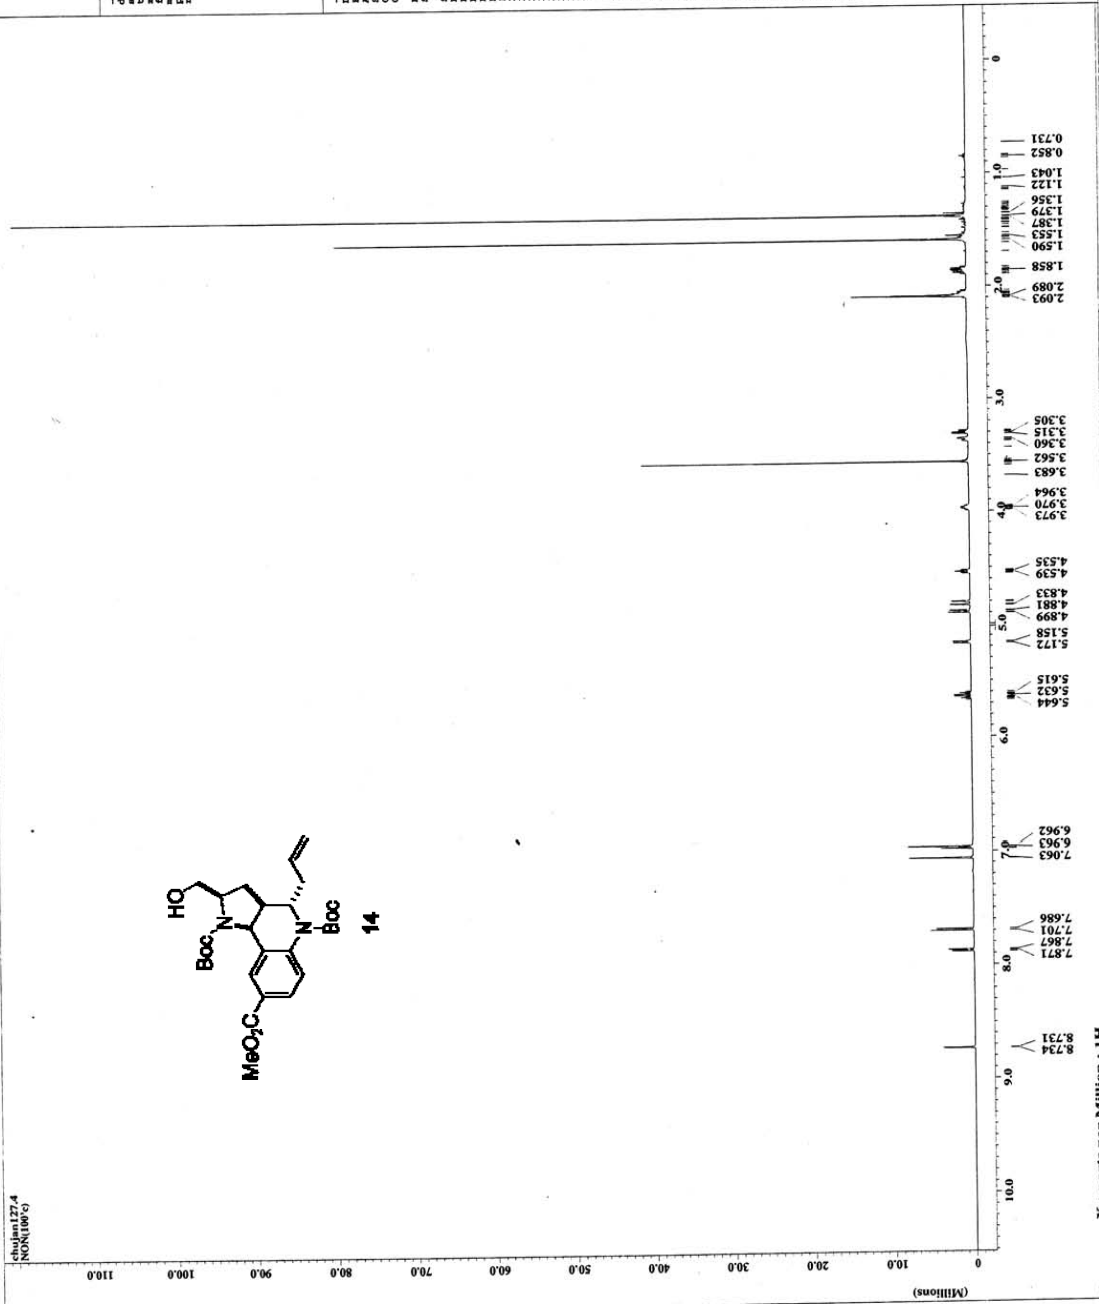

五 出 分 裝 单

X : parts per Million : 1H



Mon Nov 21 23:43:22 2006  
 C:\My Documents\人77-1\NMR AL400M

D:\ATM  
 D:\FILE  
 OBNJC  
 EXMOD  
 OFR  
 OBSET  
 OBFIN  
 POINT  
 FREQU  
 SCANS  
 ACQTM  
 PD  
 FWT  
 IRN  
 OTEMP  
 SLVINT  
 EXREF  
 BF  
 RGAIN

399.65 MHz  
 124.00 KHz  
 10500.00 Hz  
 32768  
 7993.60 Hz  
 32  
 4.093 sec  
 2.9010 sec  
 5.90 usec  
 21.4 c  
 CDCL3  
 0.00 ppm  
 0.12 Hz  
 6

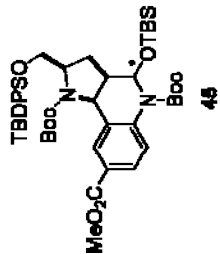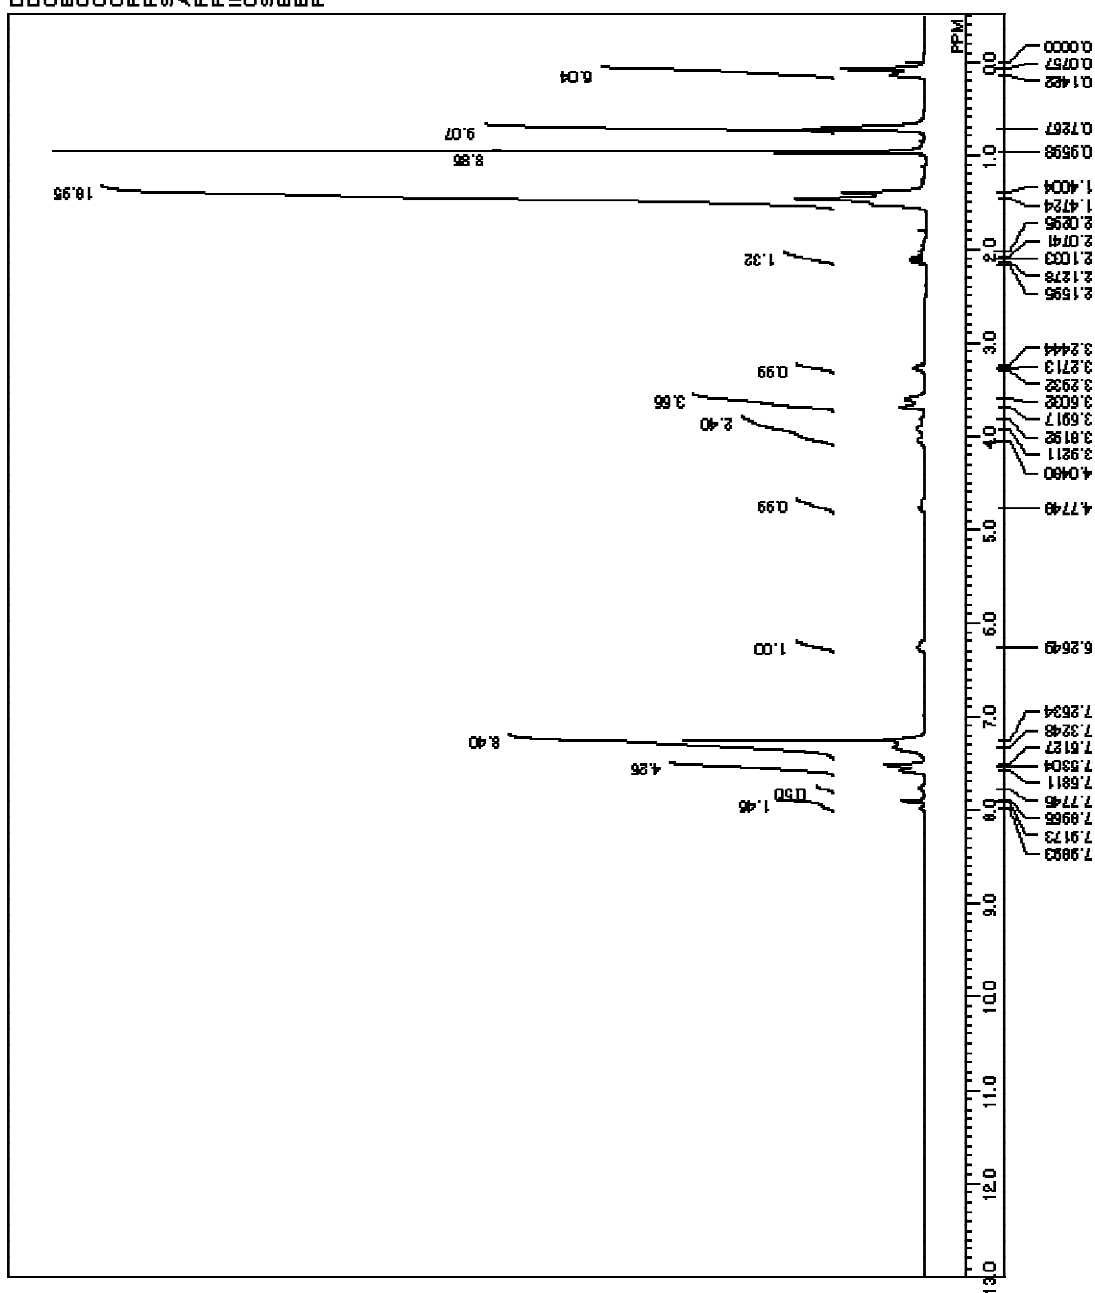

Tue Nov 22 09:10:31 2005  
 C:\My Documents\77-1\NMR AL400M

D:ATIM  
 DRFILE  
 ORNUC  
 EXMOD  
 OFR  
 OBSET  
 OFEIN  
 POINT  
 FREQU  
 SCANS  
 ACQTIM  
 PD  
 FWT  
 IRN  
 OTEMP  
 SLVINT  
 EXREF  
 BF  
 RGAIN

100.40 MHz  
 125.00 KHz  
 10500.00 Hz  
 32768  
 27173.80 Hz  
 11230  
 1.2000 sec  
 1.7940 sec  
 5.90 usec  
 19.0 c  
 CDCL3  
 0.00 ppm  
 0.12 Hz  
 21

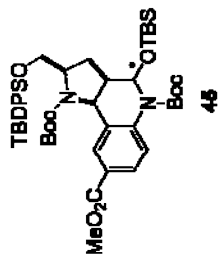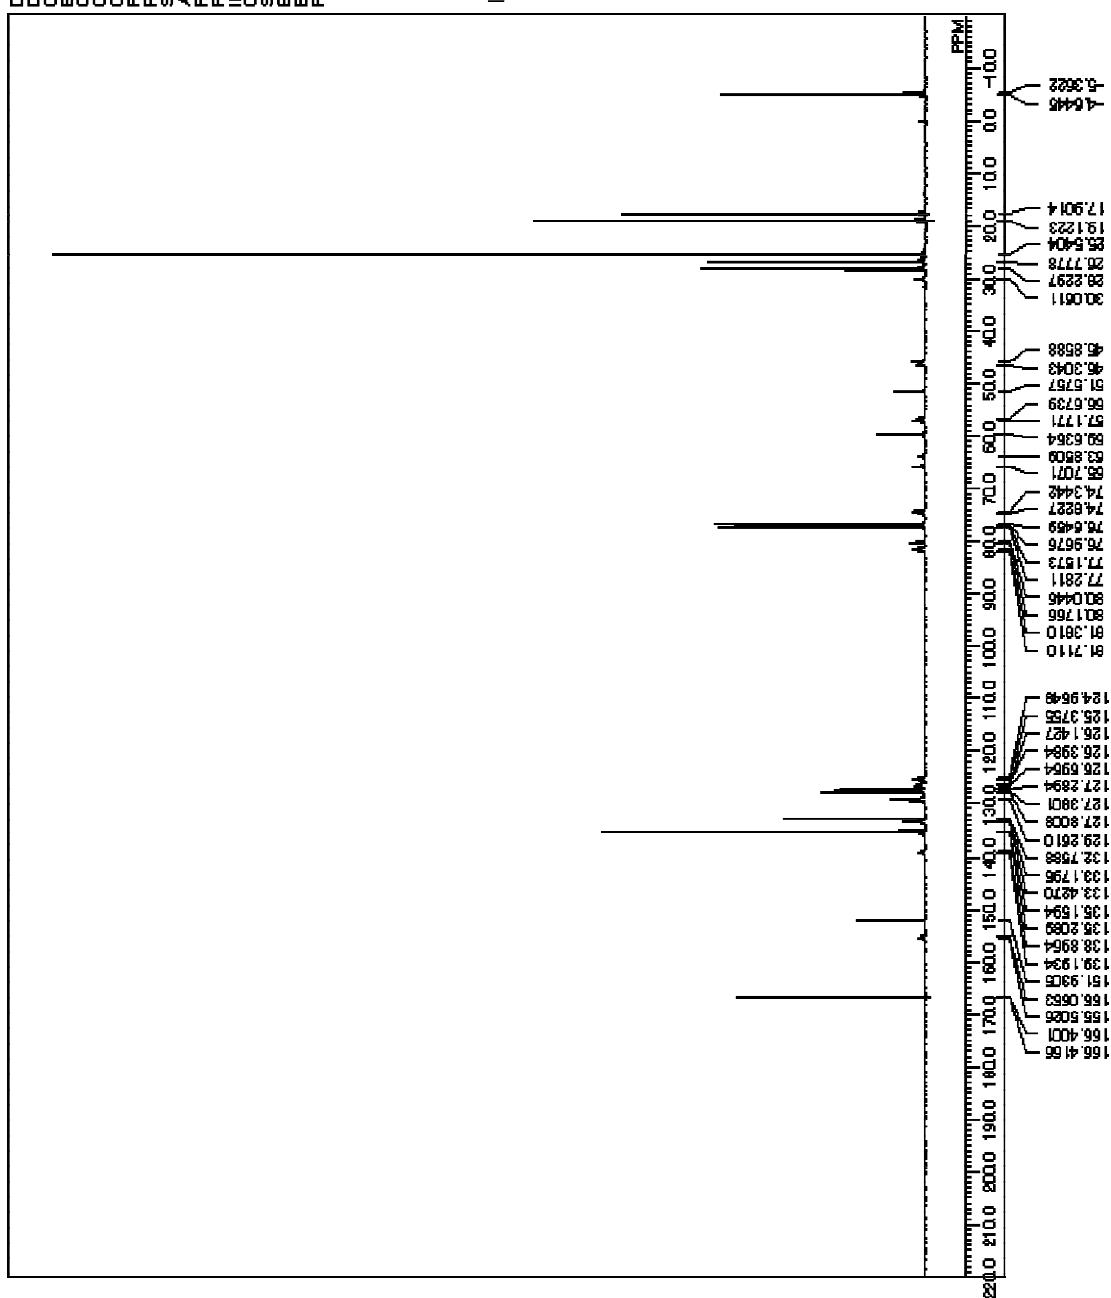



03My Documents\個人ファイル\JNMFR AL400\5田MN-Boc-nina-4data.Cals

03My Documents\個人ファイル\JNMFR AL400\5田

DFILE  
 COMINT  
 DATIM  
 DBNLC  
 EXMCO  
 DBFTRQ  
 DBSET  
 DBFIN  
 POINT  
 FREQU  
 SCANG  
 ACQTM  
 PD  
 PWI  
 IRNLD  
 CTEMP  
 BLVNT  
 EXREF  
 BF  
 REAIN

Thu Apr 05 06:27:00 2006  
 13C  
 ECM  
 99.45 MHz  
 94.00 kHz  
 10300.00 Hz  
 32768  
 26646.64 Hz  
 10360  
 1.2226 sec  
 1.7190 sec  
 0.50 usec  
 1H  
 261.0  
 CDCL3  
 0.00 ppm  
 0.42 Hz  
 24

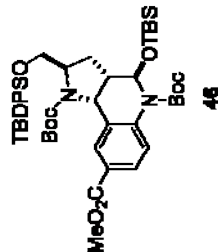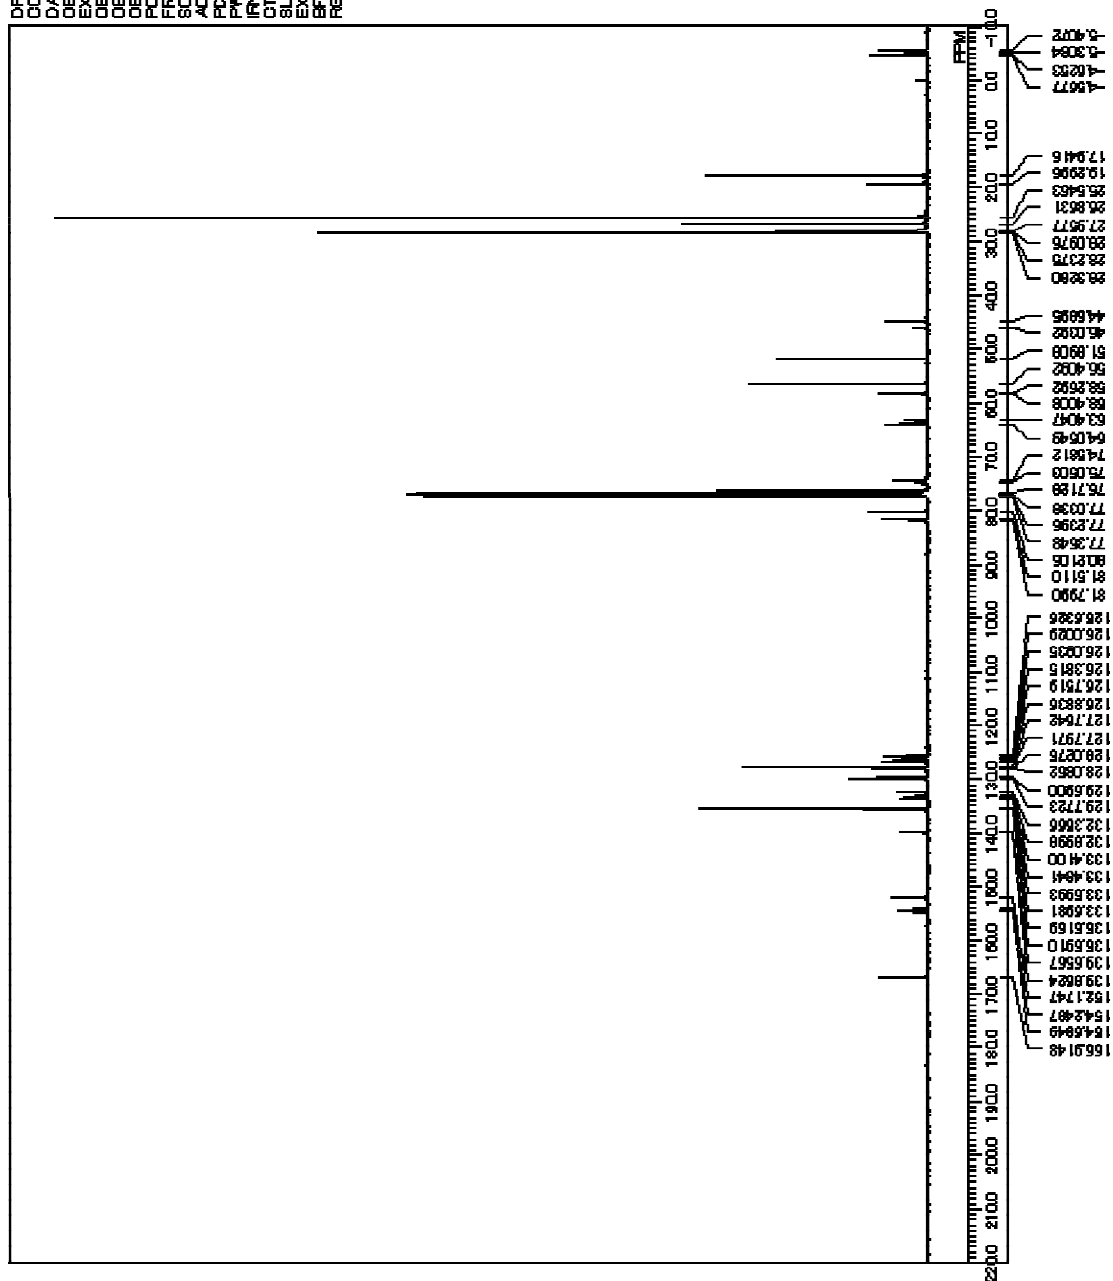

Tue Nov 29 22:38:37 2005  
 C:\My Documents\771\1\NMR AL400M

D:ATIM  
 DEFILE  
 OBNJC  
 EXMOD  
 OFR  
 OGBET  
 OBFIN  
 POINT  
 FREQU  
 SCANS  
 ACQTIM  
 PD  
 FWT  
 IRN  
 OTEMP  
 SLVINT  
 EXREF  
 BF  
 RGAIN

399.65 MHz  
 124.00 KHz  
 10500.00 Hz  
 32768  
 7993.60 Hz  
 32  
 4.093 sec  
 2.9010 sec  
 5.90 usec  
 23.5 c  
 CDCL3  
 0.00 ppm  
 0.12 Hz  
 9

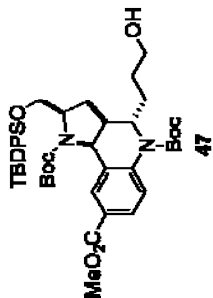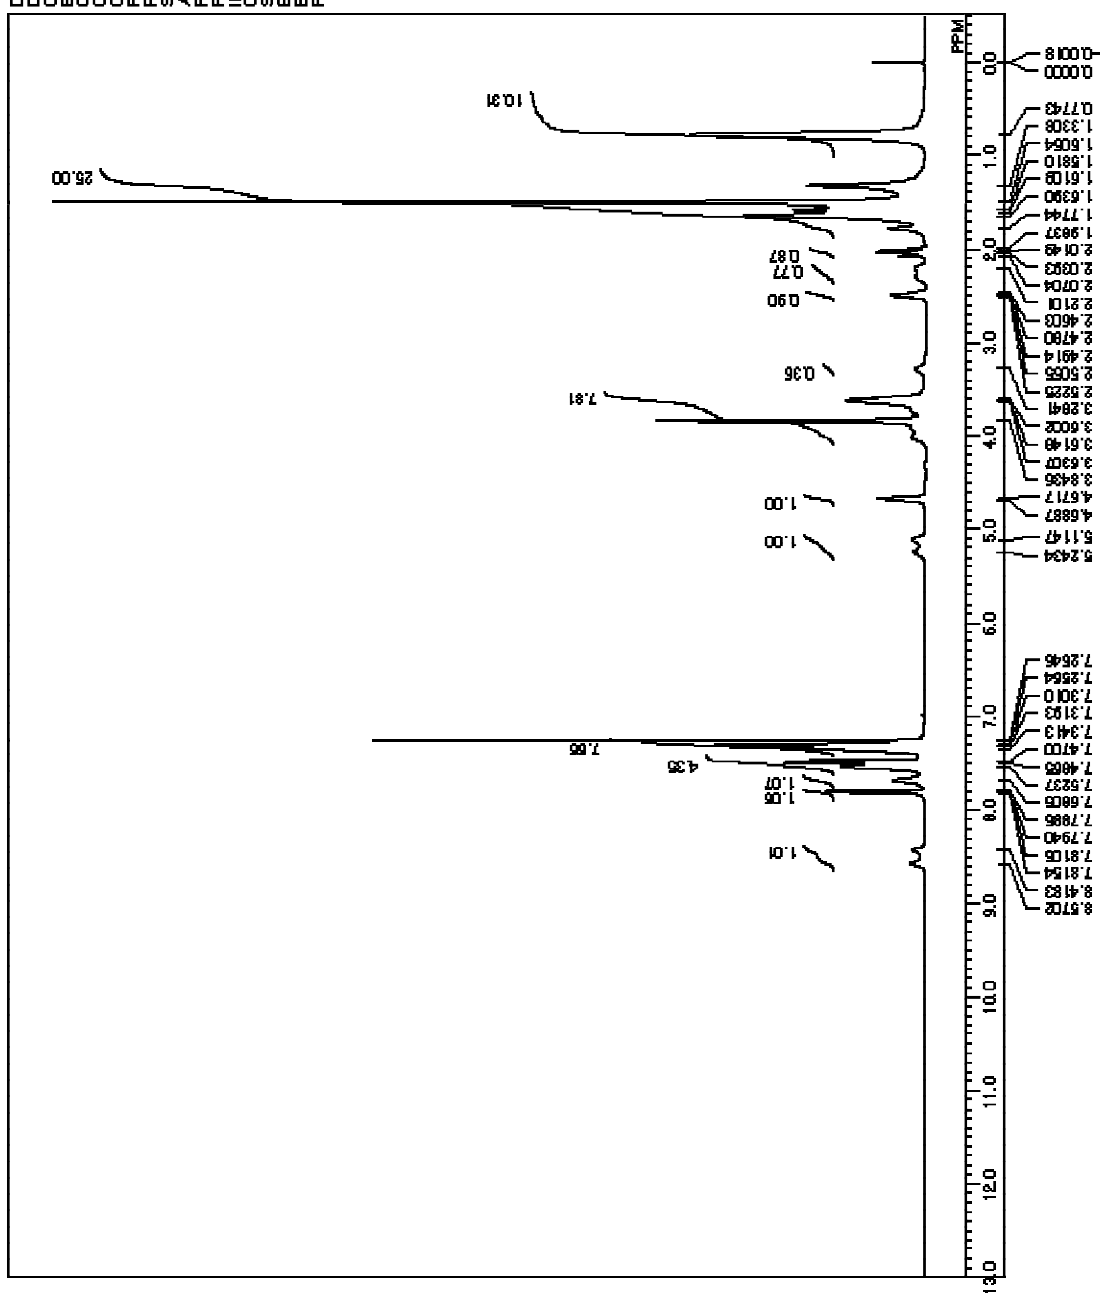



Wed Nov 30 06:57:54 2005  
 C:\My Documents\人77-1\1NMR AL400M

D:\ATM  
 D:\FILE  
 OBNJC  
 EXM0D  
 OFR  
 OBBET  
 OBFIN  
 POINT  
 FREQU  
 SCANS  
 ACQTIM  
 PD  
 FWT  
 IRN  
 OTEMP  
 SLVINT  
 EXREF  
 BF  
 RGAIN

100.40 MHz  
 125.00 KHz  
 10500.00 Hz  
 32768  
 27173.80 Hz  
 12263  
 1.2069 sec  
 1.7940 sec  
 5.90 usec

20.9 c  
 CDCL3  
 77.00 ppm  
 0.12 Hz  
 24

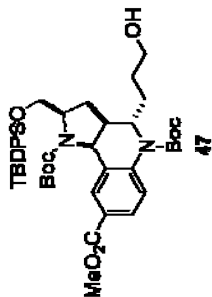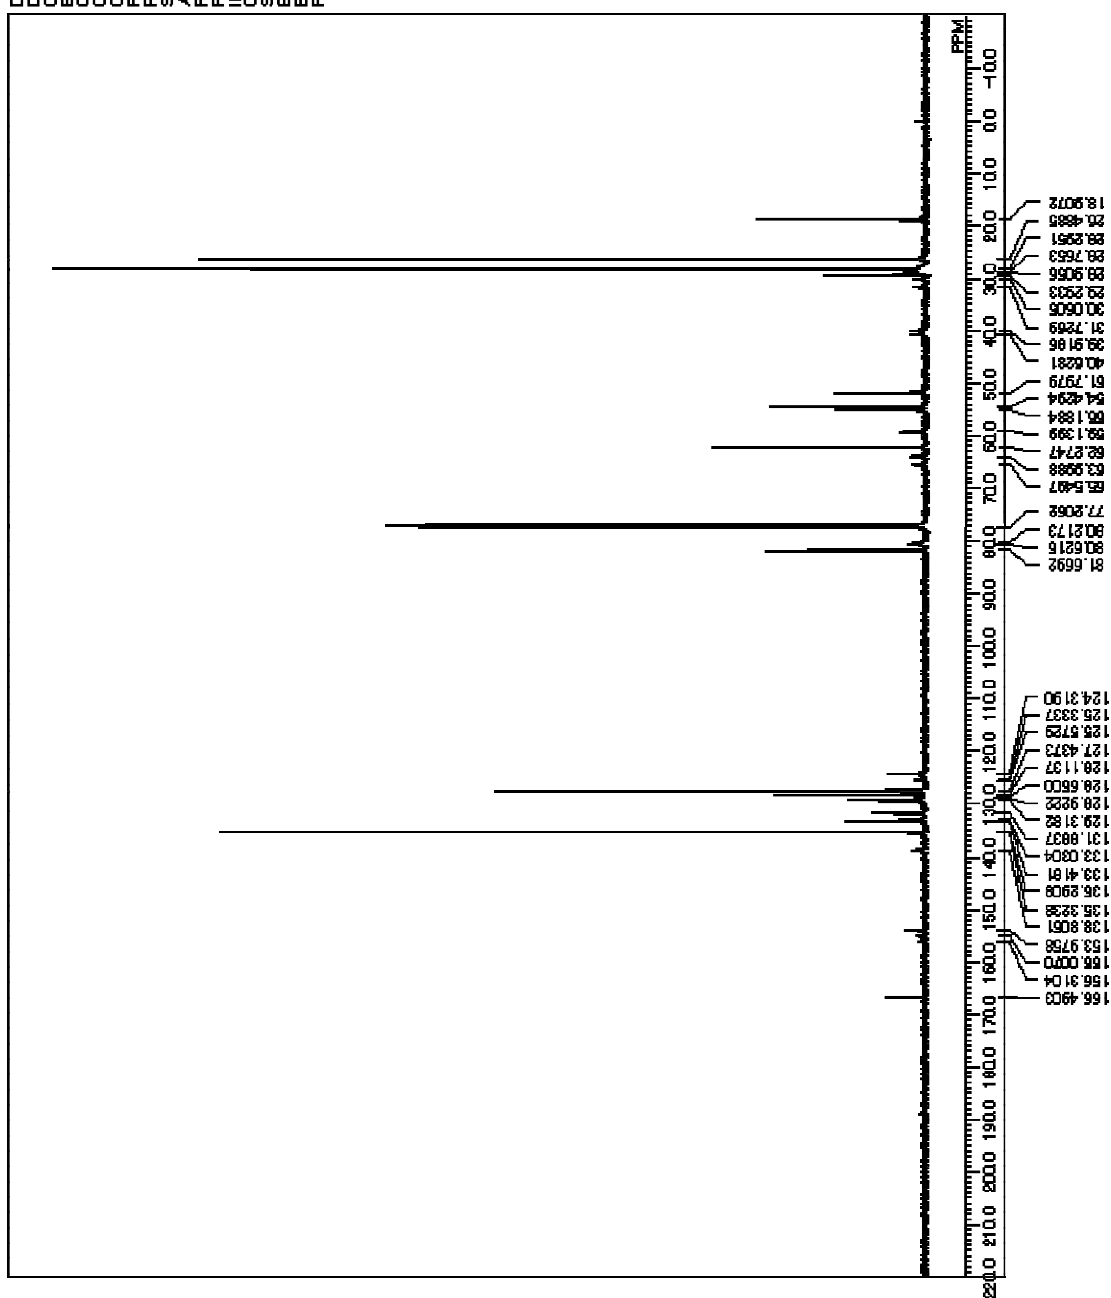

OMMy Documents\\個人\\7-1\\JNMIR\_AL400\\EEMN-9EEN-mhro-deta-hls

OMMy Documents\\個人\\7-1\\JNMIR\_AL400\\E

Thu Apr 05 23:12:55 2006

DFILE COMINT  
 D:ATM  
 DEBUC  
 EXM00  
 DEBTR0  
 DESSET  
 DEBEN  
 POINT  
 FREQU  
 SCANS  
 ACQTM  
 PD  
 PWI  
 IRNLD  
 CTEMP  
 BLVNT  
 EXREF  
 BF  
 REAN

1H  
 NDN  
 395.75 MHz  
 124.00 kHz  
 10271.00 Hz  
 32768  
 7919.95 Hz  
 54  
 41141.580  
 2.8900 s80  
 3.80 usec  
 1H  
 243.0  
 CDCL3  
 0.00 ppm  
 0.12 Hz  
 12

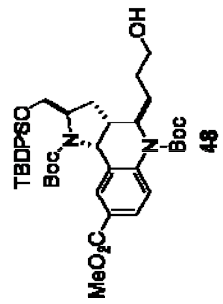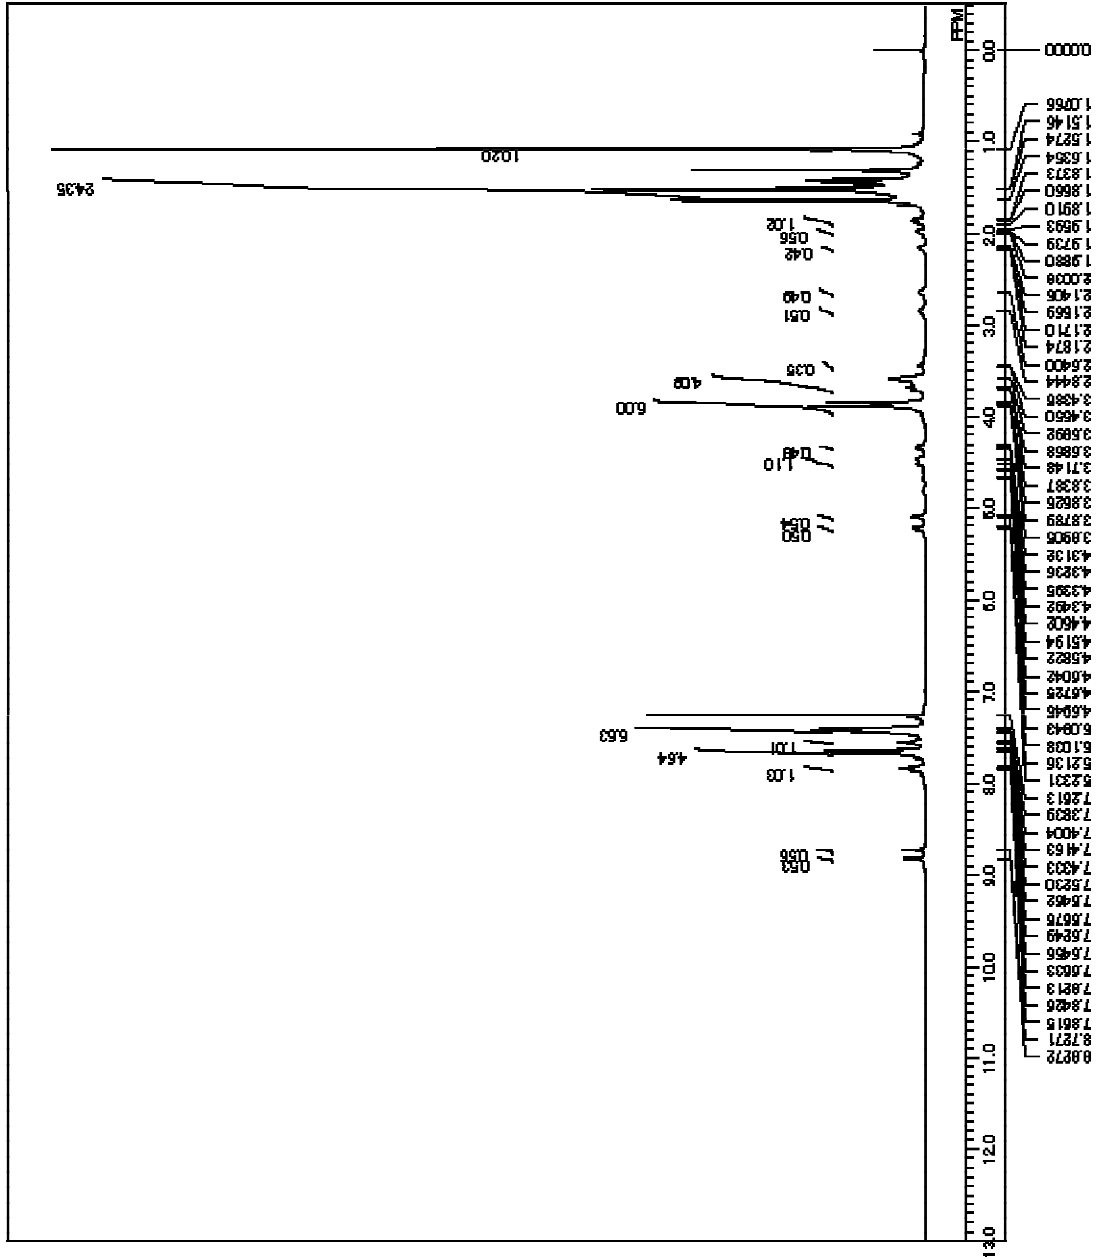

OMMy Documents\\個人ファイル\\1\\NMR\\AL4006\\H

DFILE COMINT  
D:ATM 13C  
DENUO ECM  
EXMOD 99.45 MHz  
DETRQ 9400 kHz  
DESET 10300.00 Hz  
POINT 32768  
FREQU 269465.64 Hz  
SCANS 11016  
ACQTM 1.2208 s80  
PD 1.7190 s80  
PWI 0.50 usec  
IRNLD 1H  
CTEMP 26.0 o  
BLVNT CDCL3  
EXREF 0.00 ppm  
BF 0.46 Hz  
RGAIN 24

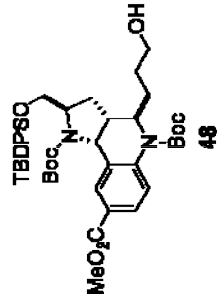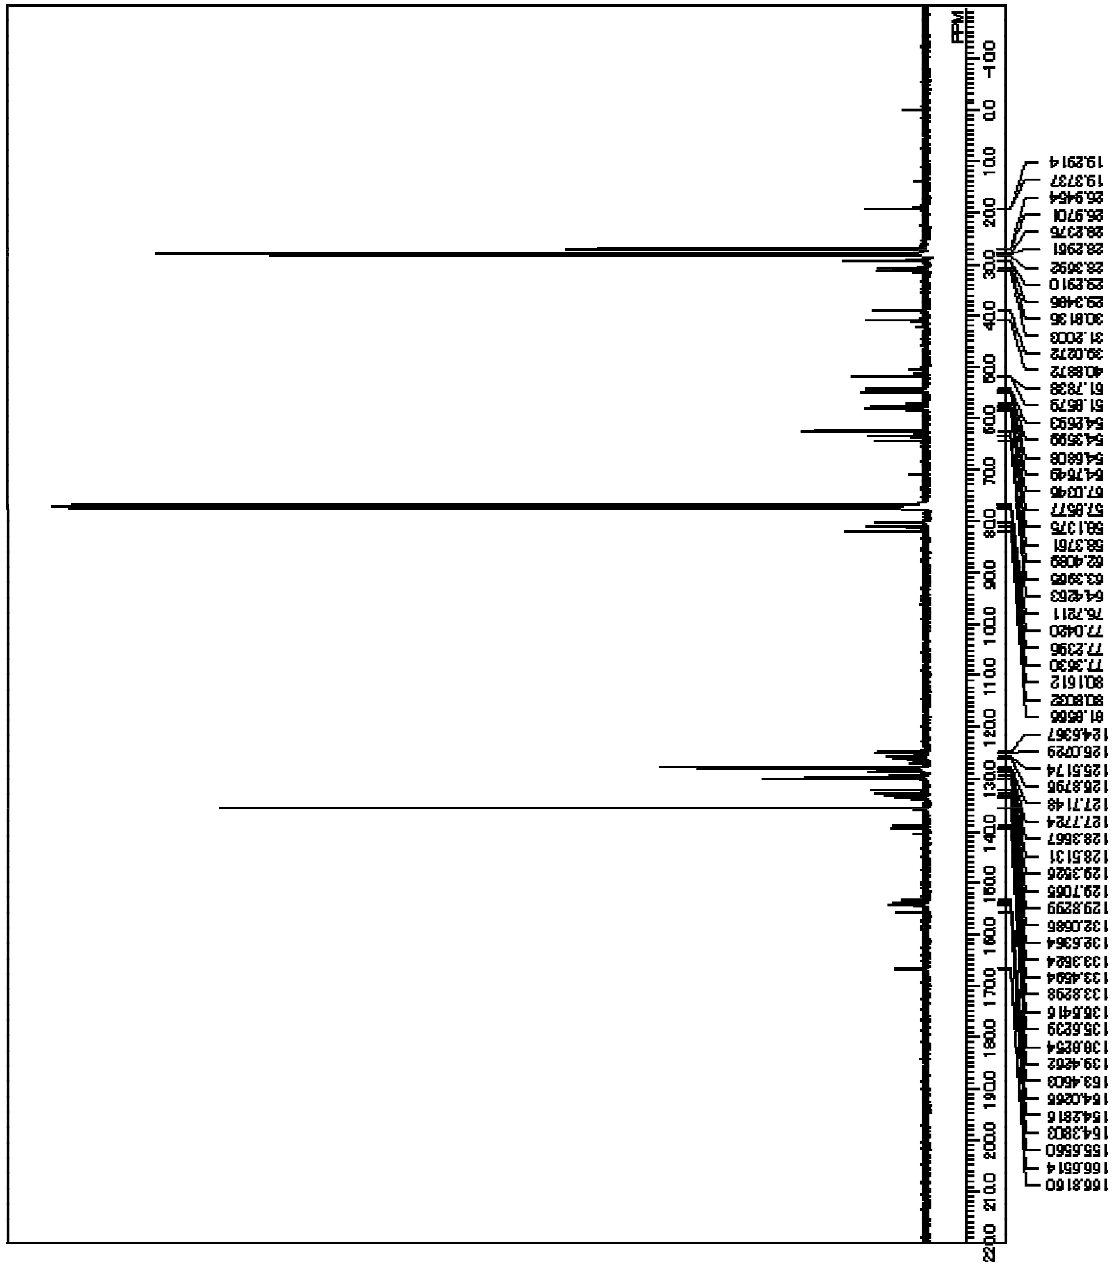

OMMy Documents\\個人ファイル\\1\\NMR\\AL4006\\EEMN-9EEN-minor-data.cis

Fri Dec 09 02:39:46 2005  
 C:\My Documents\人77-1\NMR AL400M

D:ATM  
 D:FNLC  
 O:BNJC  
 EX:MOD  
 OFR  
 O:BSST  
 O:BFIN  
 POINT  
 FREQ:U  
 SCANS  
 ACQ:TM  
 PD  
 FWT  
 IRN  
 O:TEMP  
 SL:VINT  
 EX:REF  
 BF  
 RGAIN

395.75 MHz  
 124.00 KHz  
 10277.00 Hz  
 32768  
 7919.96 Hz  
 27  
 4141.80  
 2.6950 sec  
 5.80 usec  
 25.1 c  
 0.00 ppm  
 0.12 Hz  
 13

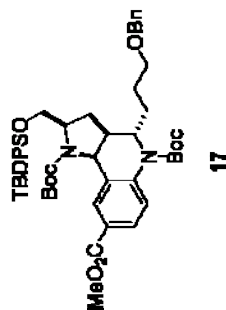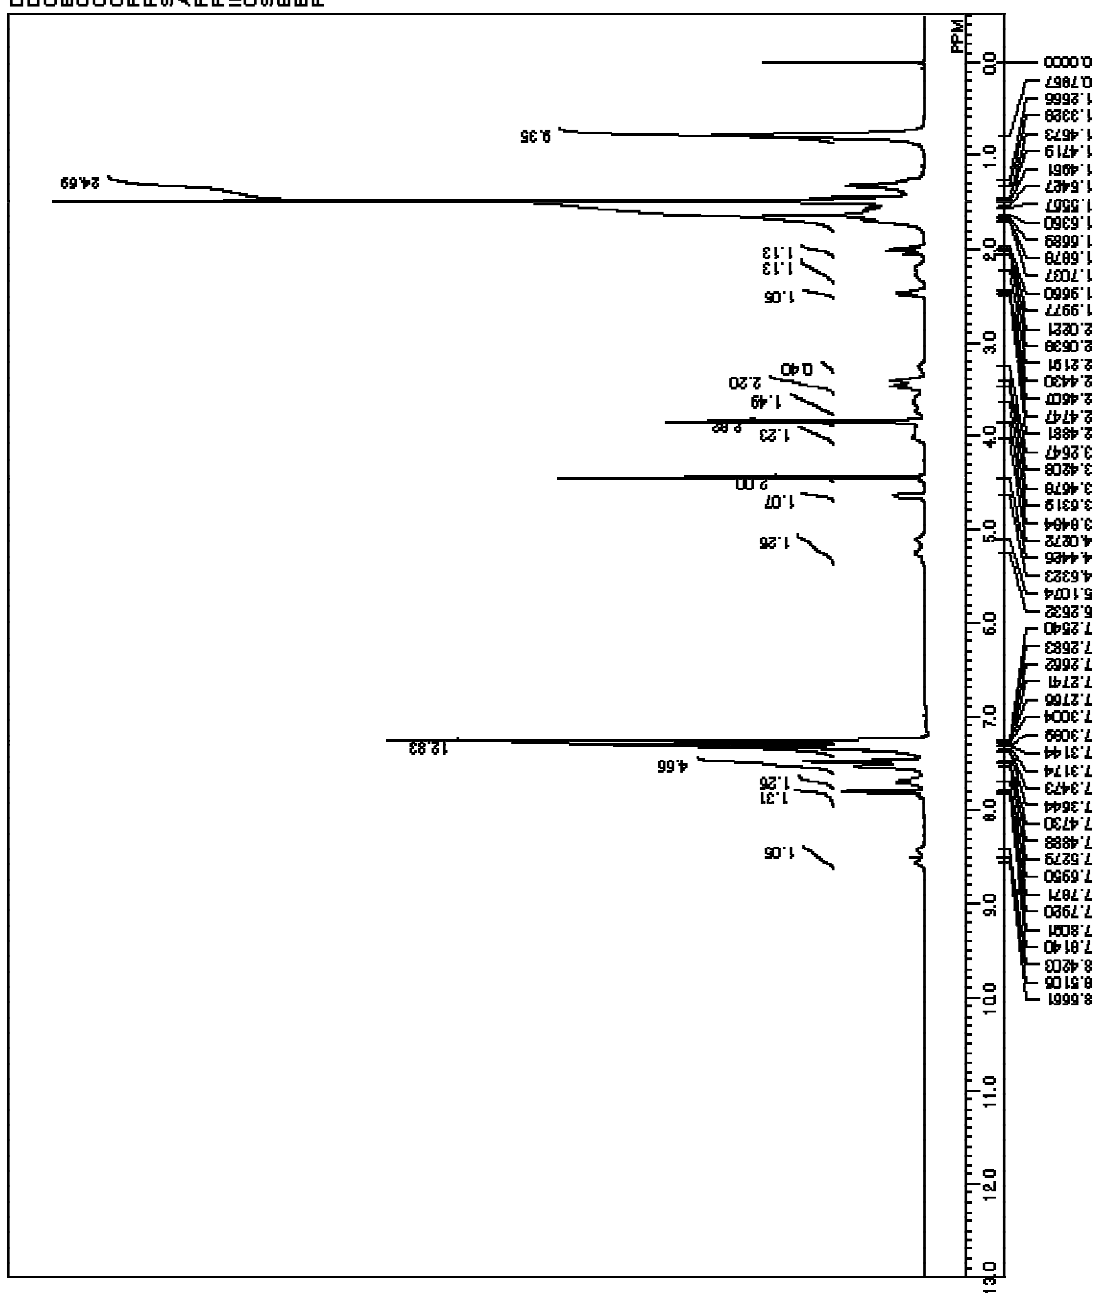

Set Dec 10 06:54:38 2005  
 C:\My Documents\人77-1\NMR AL400M

D:ATIM  
 DRFILE  
 ORNJUC  
 EXMIDD  
 OFR  
 OBSET  
 OBFIN  
 POINT  
 FREQUL  
 SCANS  
 ACQTIM  
 PD  
 FWT  
 IRN  
 OTEMP  
 SLVINT  
 EXREF  
 BF  
 RGAIN

90.46 MHz  
 94.00 KHz  
 10000.00 Hz  
 32768  
 26246.64 Hz  
 12278  
 1.2006 sec  
 1.7790 sec  
 6.50 usec  
 25.4 c  
 CDCL3  
 77.00 ppm  
 0.12 Hz  
 24

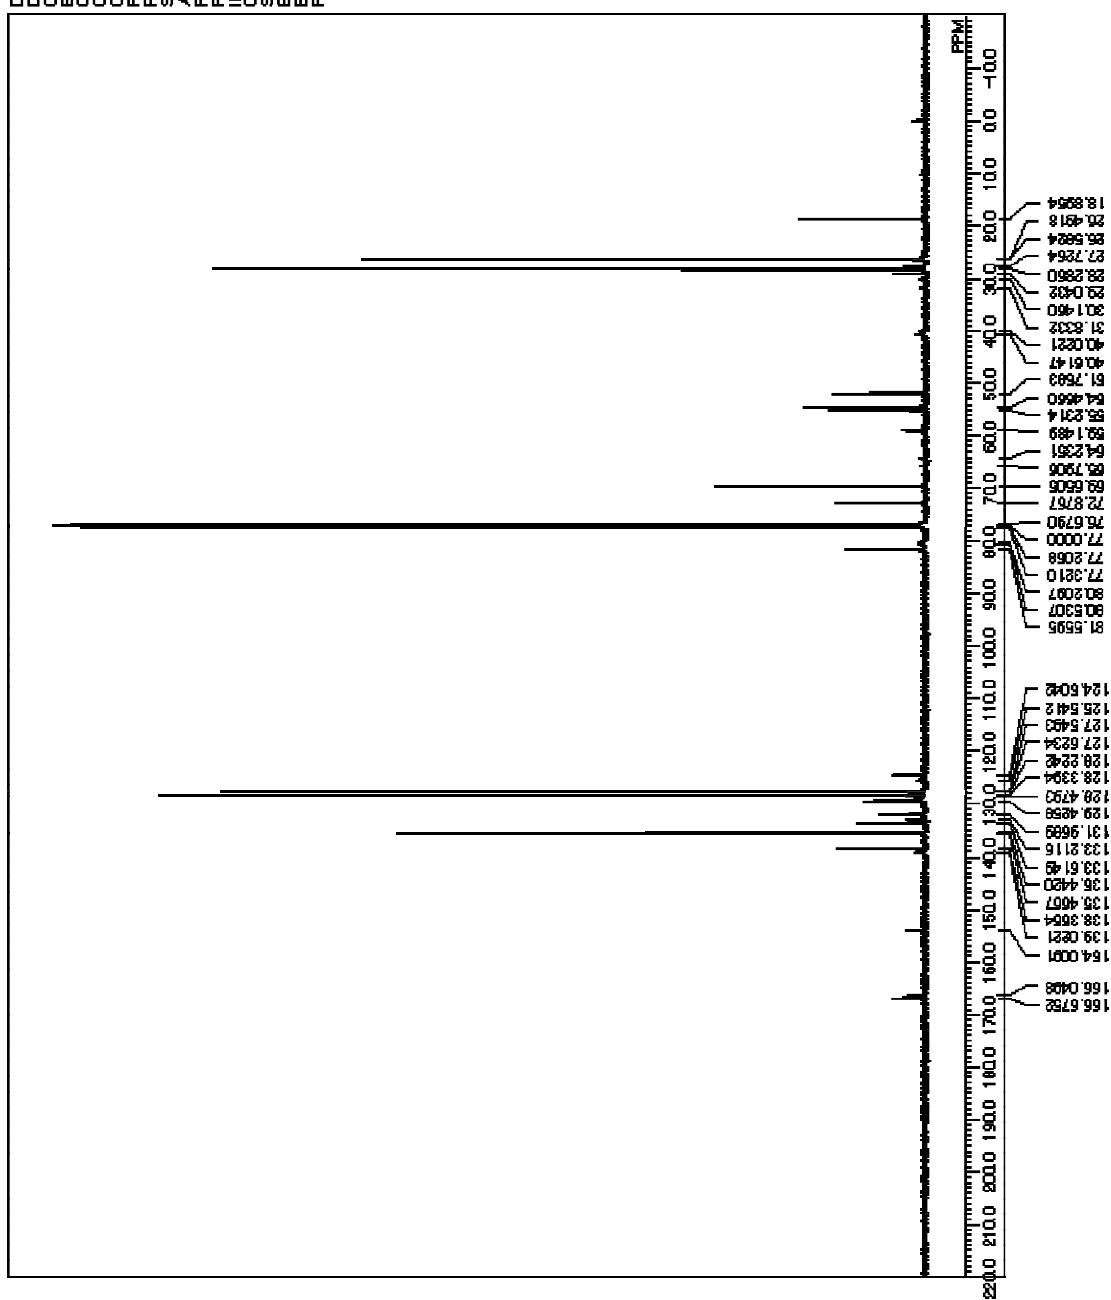

OsMy Documents\日本人フア-イ\1\NMR AL4006\4006\H

DFILE  
 COMINT  
 DATM  
 DEINUC  
 EXMDO  
 DEFTRO  
 DESSET  
 DEFTN  
 POINT  
 FREQU  
 SCANS  
 ACQTM  
 PD  
 PWI  
 IRNLD  
 CTEMP  
 BLVNT  
 EXREF  
 BF  
 REAN

Mon\_Apr 10 23:07:20 2006  
 1H  
 NDN  
 305.75 MHz  
 124.00 kHz  
 10277.00 Hz  
 32768  
 7912.95 Hz  
 54  
 41141.580  
 2.8000 s80  
 3.80 usec  
 1H  
 26.3 o  
 CDCL3  
 0.00 ppm  
 0.12 Hz  
 9

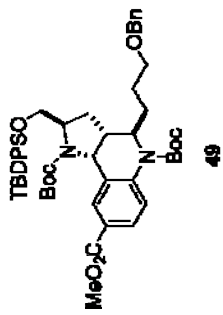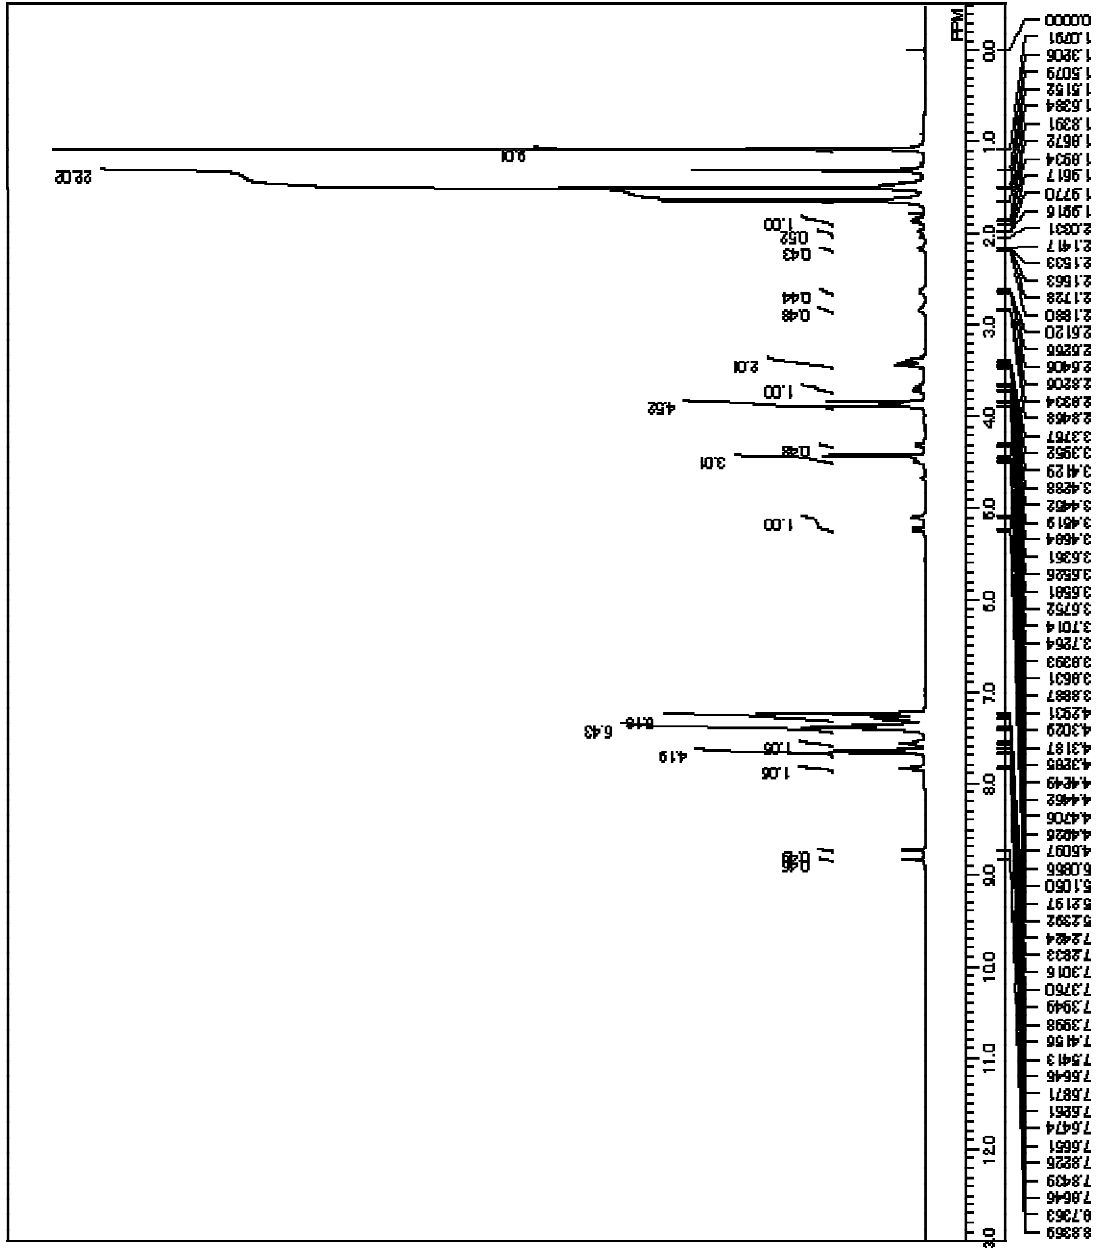

OsMy Documents\日本人フア-イ\1\NMR AL4006\4006\HBT-minor-delta-Hels

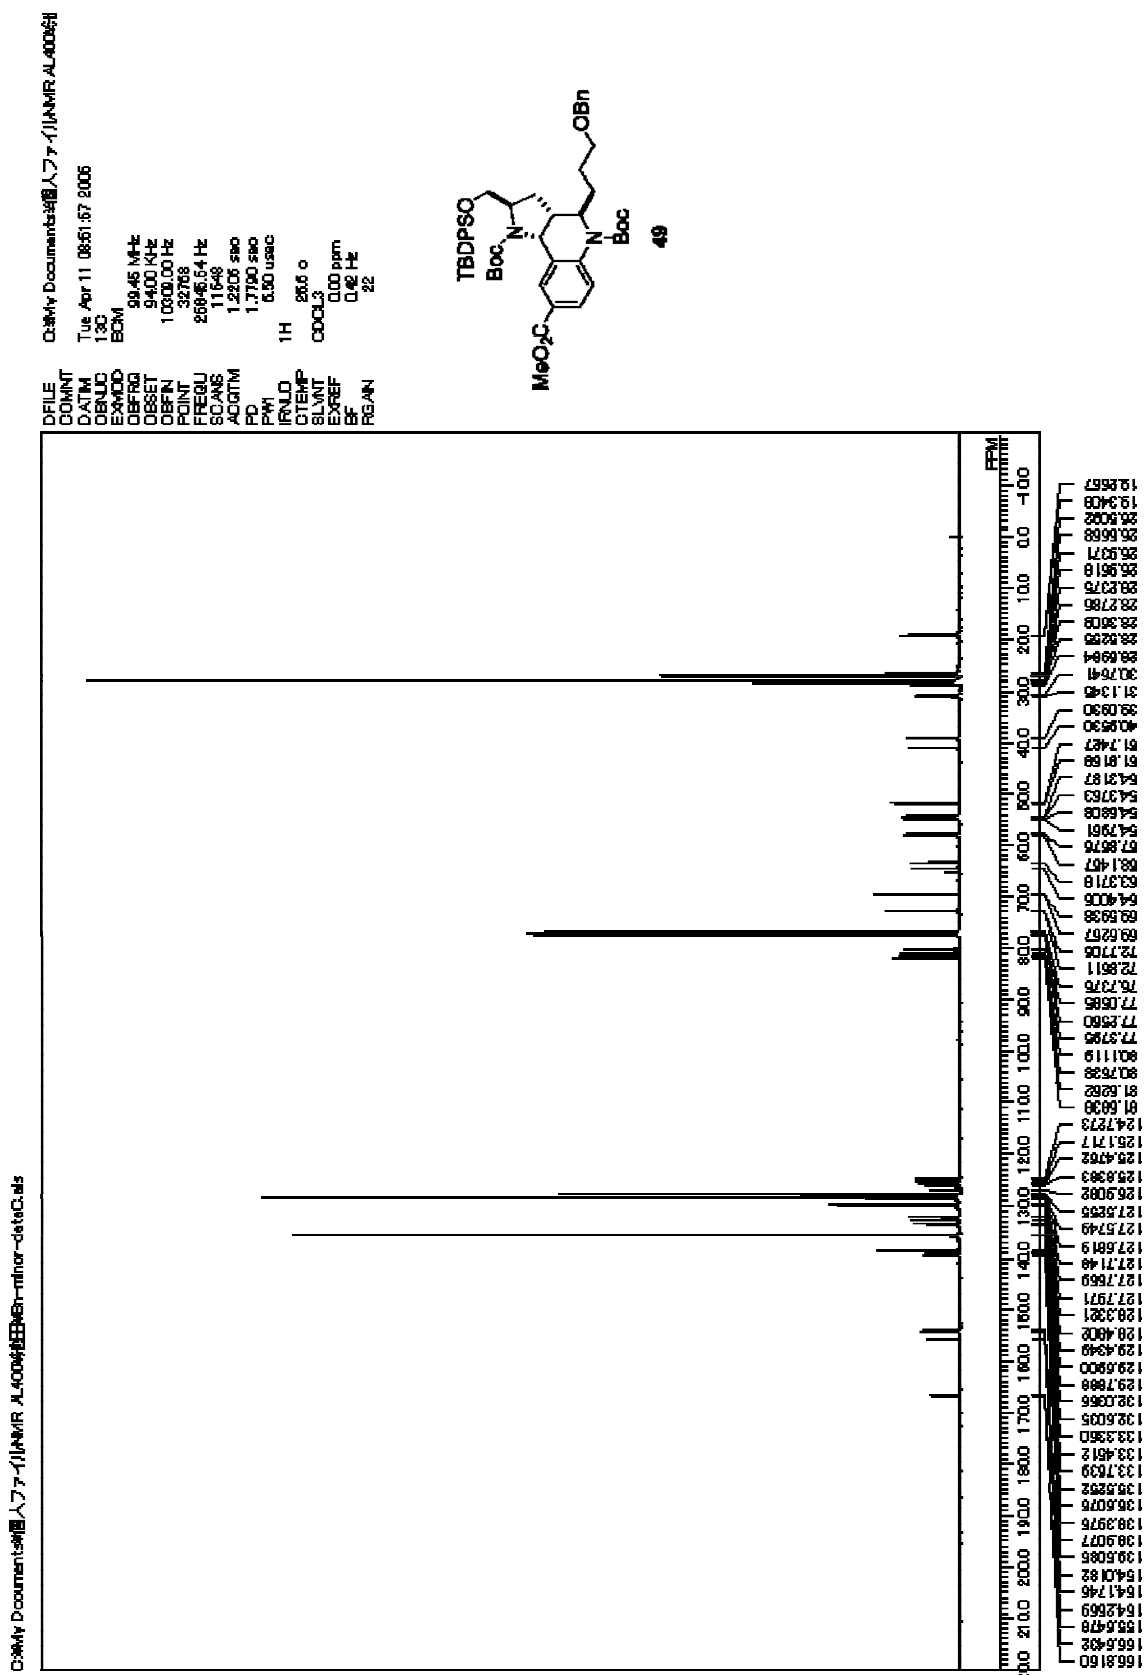

Thu Sep 15 17:20:20 2005  
 C:\My Documents\77-1\NMR AL400M

D:ATM  
 D:FNLE  
 O:BNJC  
 EX:MOD  
 OFR  
 O:BSST  
 O:BFIN  
 POINT  
 FREQ:U  
 SCANS  
 ACQ:TM  
 PD  
 FWI  
 IRN  
 O:TEMP  
 SL:VINT  
 EX:REF  
 BF  
 RGAIN

399.65 MHz  
 124.00 KHz  
 10500.00 Hz  
 32768  
 7993.60 Hz  
 16  
 4.093 sec  
 2.9010 sec  
 5.90 usec  
 25.7 c  
 CDCl<sub>3</sub>  
 0.00 ppm  
 0.12 Hz  
 9

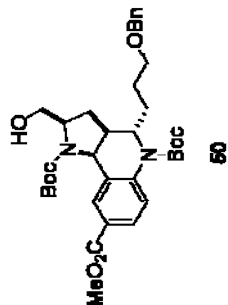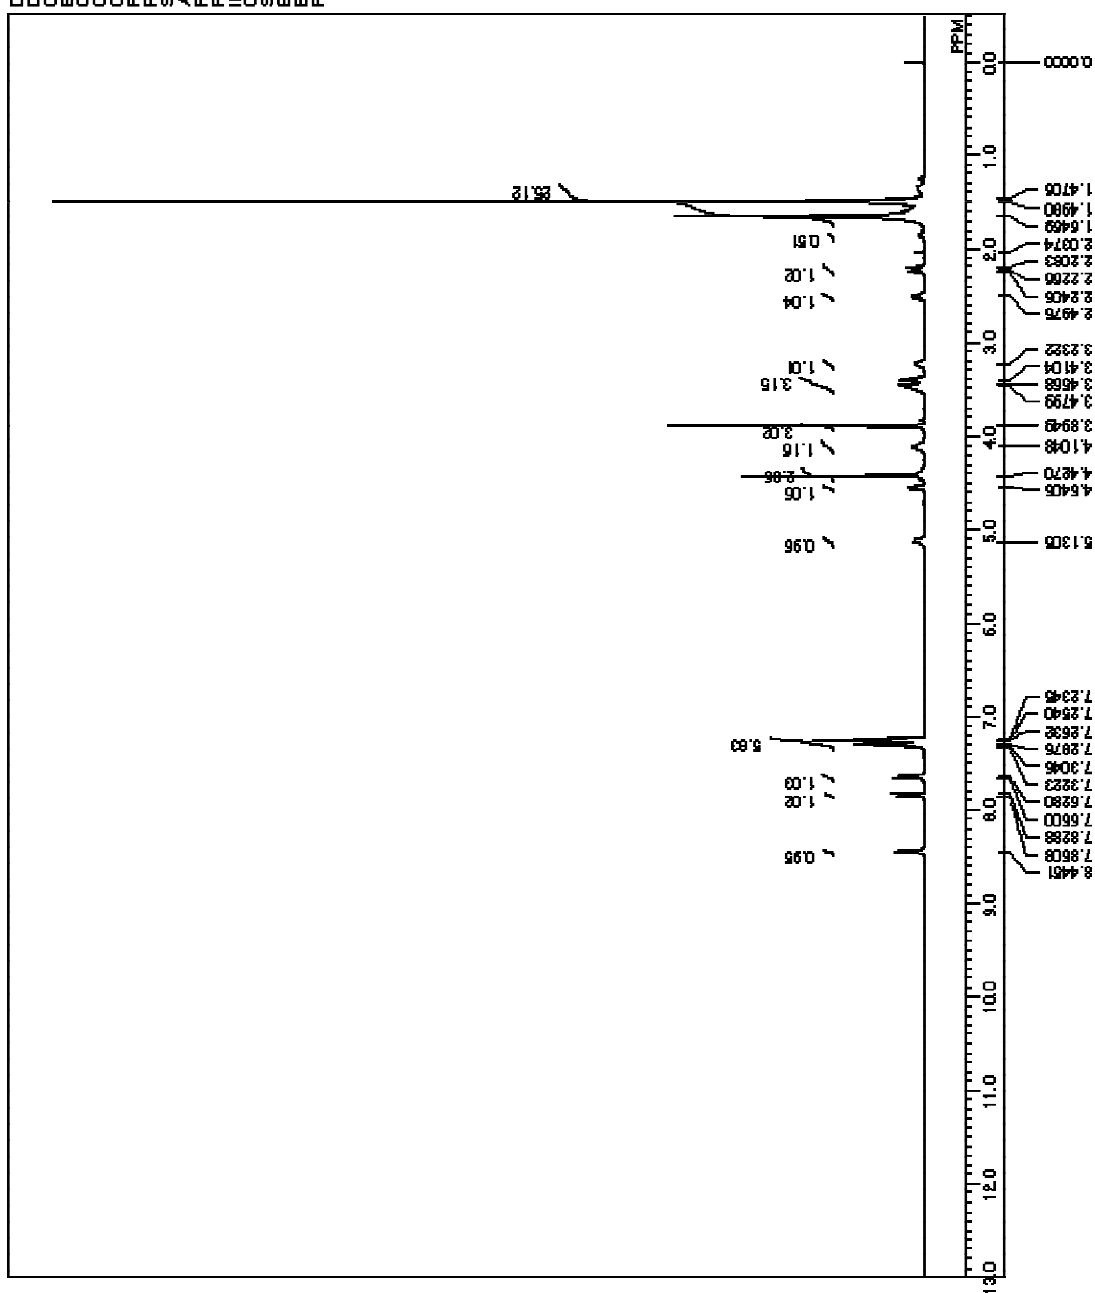



Thu Sep 22 01:13:25 2005  
C:\My Documents\77-1\NMR AL400M

D:ATIM  
D:FNLC  
D:BNJC  
EXMOD  
D:FR  
D:BSST  
D:BFIN  
D:POINT  
D:FREQU  
D:SCANS  
D:ACQTIM  
D:PD  
D:FWI  
D:IRN  
D:OTEMP  
D:SLVINT  
D:EXREF  
D:BF  
D:RGAIN

100.40 MHz  
125.00 KHz  
10500.00 Hz  
32768  
27173.80 Hz  
1.024  
1.2000 sec  
1.7940 sec  
5.90 usec  
25.5 c  
CDCl<sub>3</sub>  
77.00 ppm  
0.12 Hz  
22

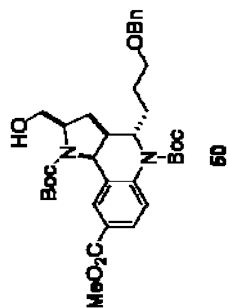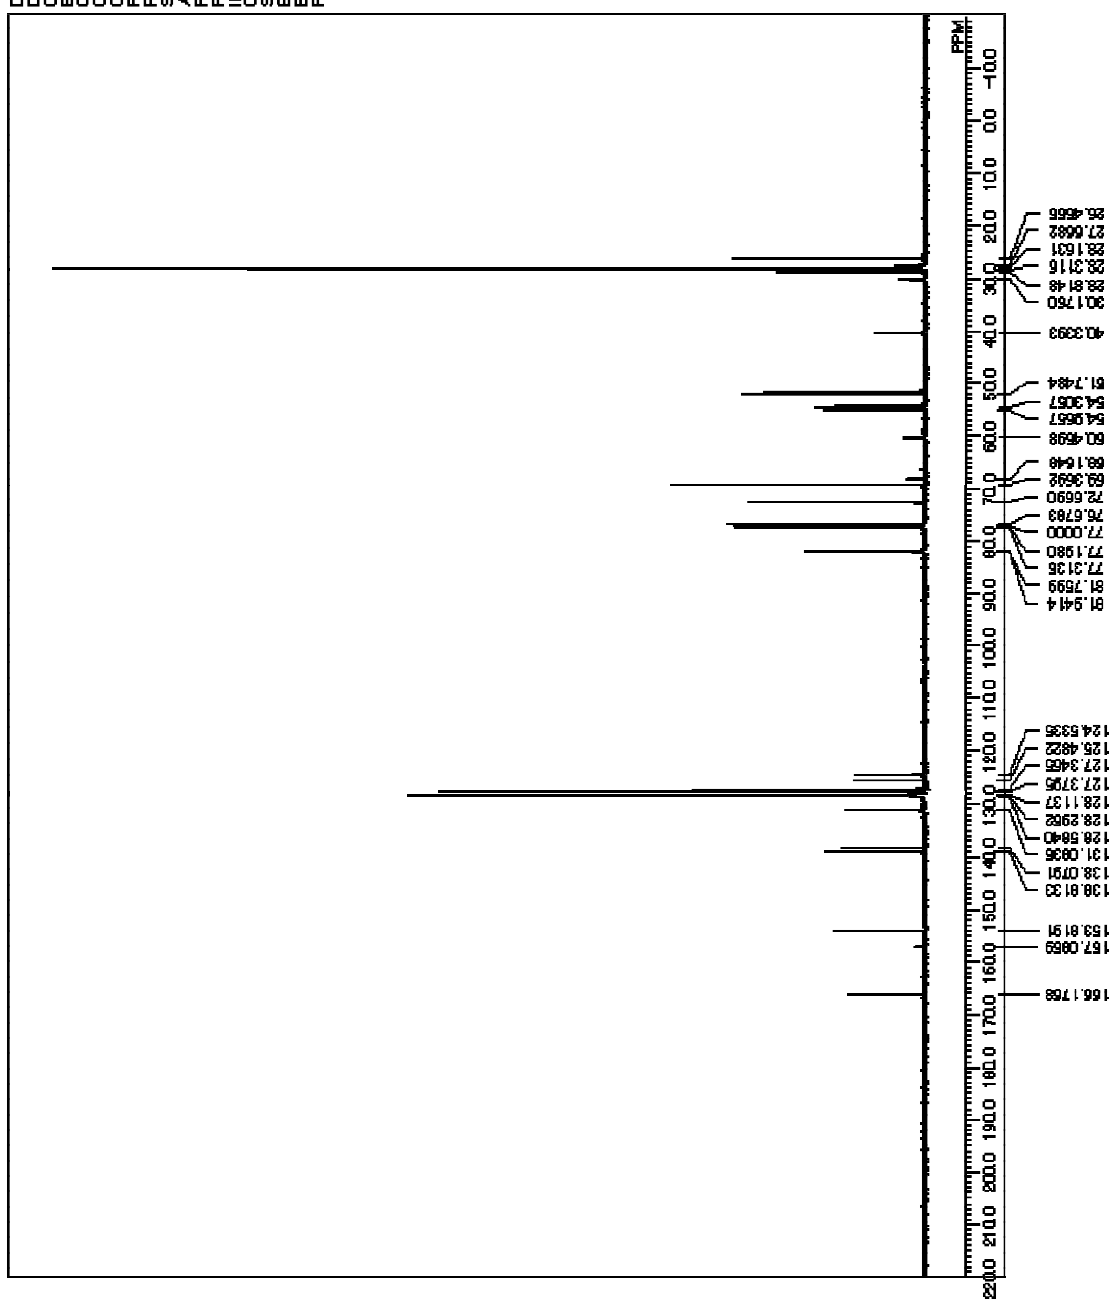

D:\My Documents\日本人7-1\1D-NMR AL 400\6-TBAF-minor-data\Hals

D:\My Documents\日本人7-1\1D-NMR AL 400

Tue Apr 11 23:17:41 2006

1H  
NMR  
EXAMOD 300.76 MHz  
CINUC 124.00 KHz  
CIBFREQ 10277.00 Hz  
CIBSET 32768  
FPOINT 791.636 Hz  
FREQUL 64  
SCANS 41.481 sec  
ADGTM 2.8690 sec  
PD 6.80 usso  
PWI 1H  
IRNUC 20.6 o  
CITEMP 0.00 ppm  
SLVNT CDCL3  
EXREF 01.2 Hz  
BF 10  
RGAIN

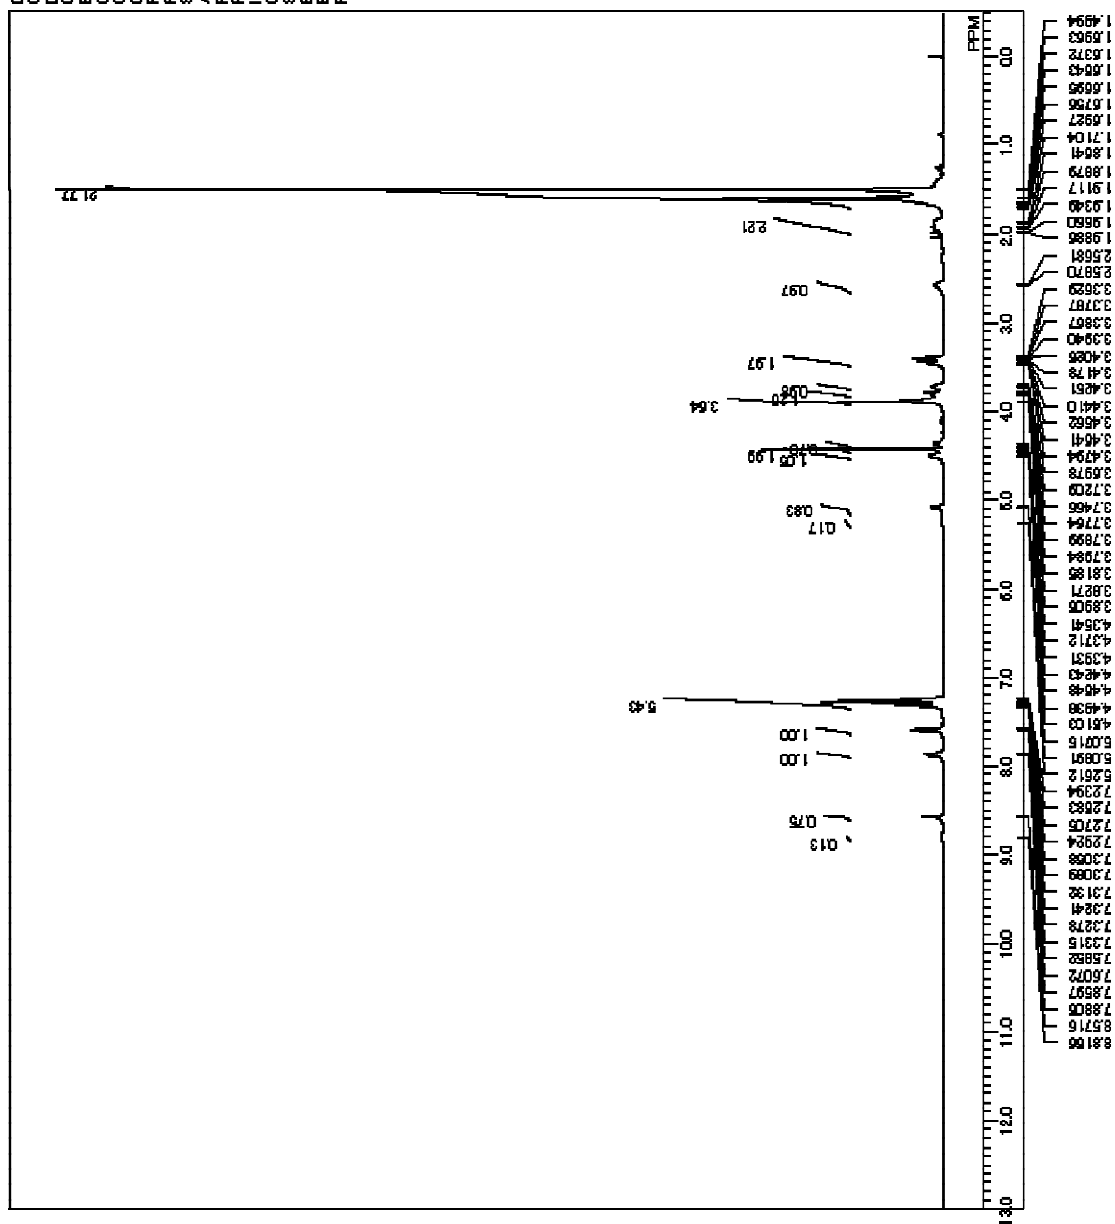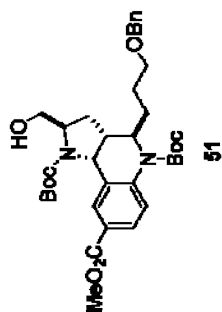

Q:\My Documents\1107-1\11NMR\_AL4006\11NMR\_AL4006\11E  
 Q:\My Documents\1107-1\11NMR\_AL4006\11NMR\_AL4006\11E

F1LE COMPT  
 DATIM  
 1.30  
 EXMOD  
 BOV  
 OBFTG  
 OBSET  
 OBRIN  
 POINT  
 FREQU  
 SCANS  
 ACQTM  
 PD  
 PVM  
 IRALJ  
 CTMP  
 SLVNT  
 EXREF  
 EF  
 REAIN

Wed Apr 12 08:57:53 2006  
 99.46 MHz  
 94.00 KHz  
 10308.00 Hz  
 32788  
 26646.64 Hz  
 11577  
 1.2206 sec  
 1.7790 sec  
 6.50 us/c  
 1H  
 20.0 o  
 CDCL3  
 0.00 ppm  
 0.42 Hz  
 24

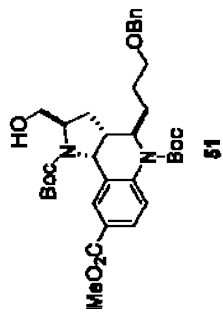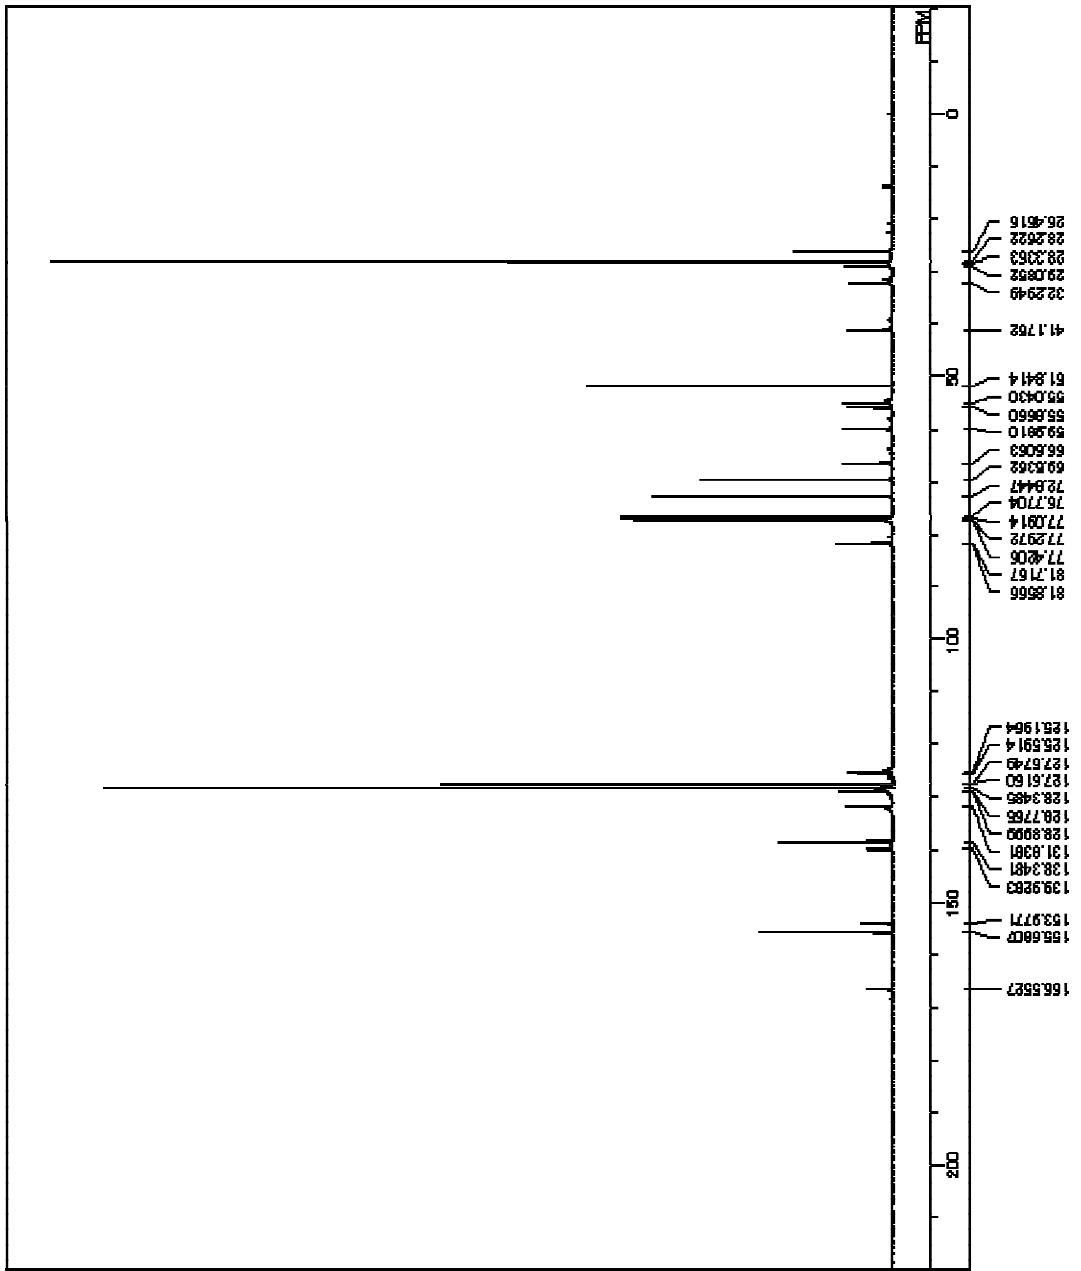

Tue Sep 27 13:36:54 2005  
 C:\My Documents\77-1\NMR AL400M

D:ATM  
 DRFLC  
 ORNJUC  
 EXMOD  
 OFR  
 OBSET  
 OFEIN  
 POINT  
 FREQUL  
 SCANS  
 ACQTIM  
 PD  
 FWT  
 IRN  
 OTEMP  
 SLVINT  
 EXREF  
 BF  
 RGAIN

399.65 MHz  
 124.00 KHz  
 10500.00 Hz  
 32768  
 7993.60 Hz  
 32  
 4.093 sec  
 2.9010 sec  
 5.90 usec  
 25.0 c  
 CDCL3  
 0.00 ppm  
 0.12 Hz  
 14

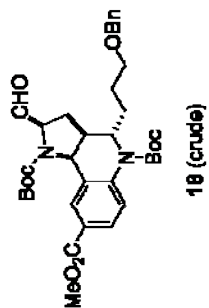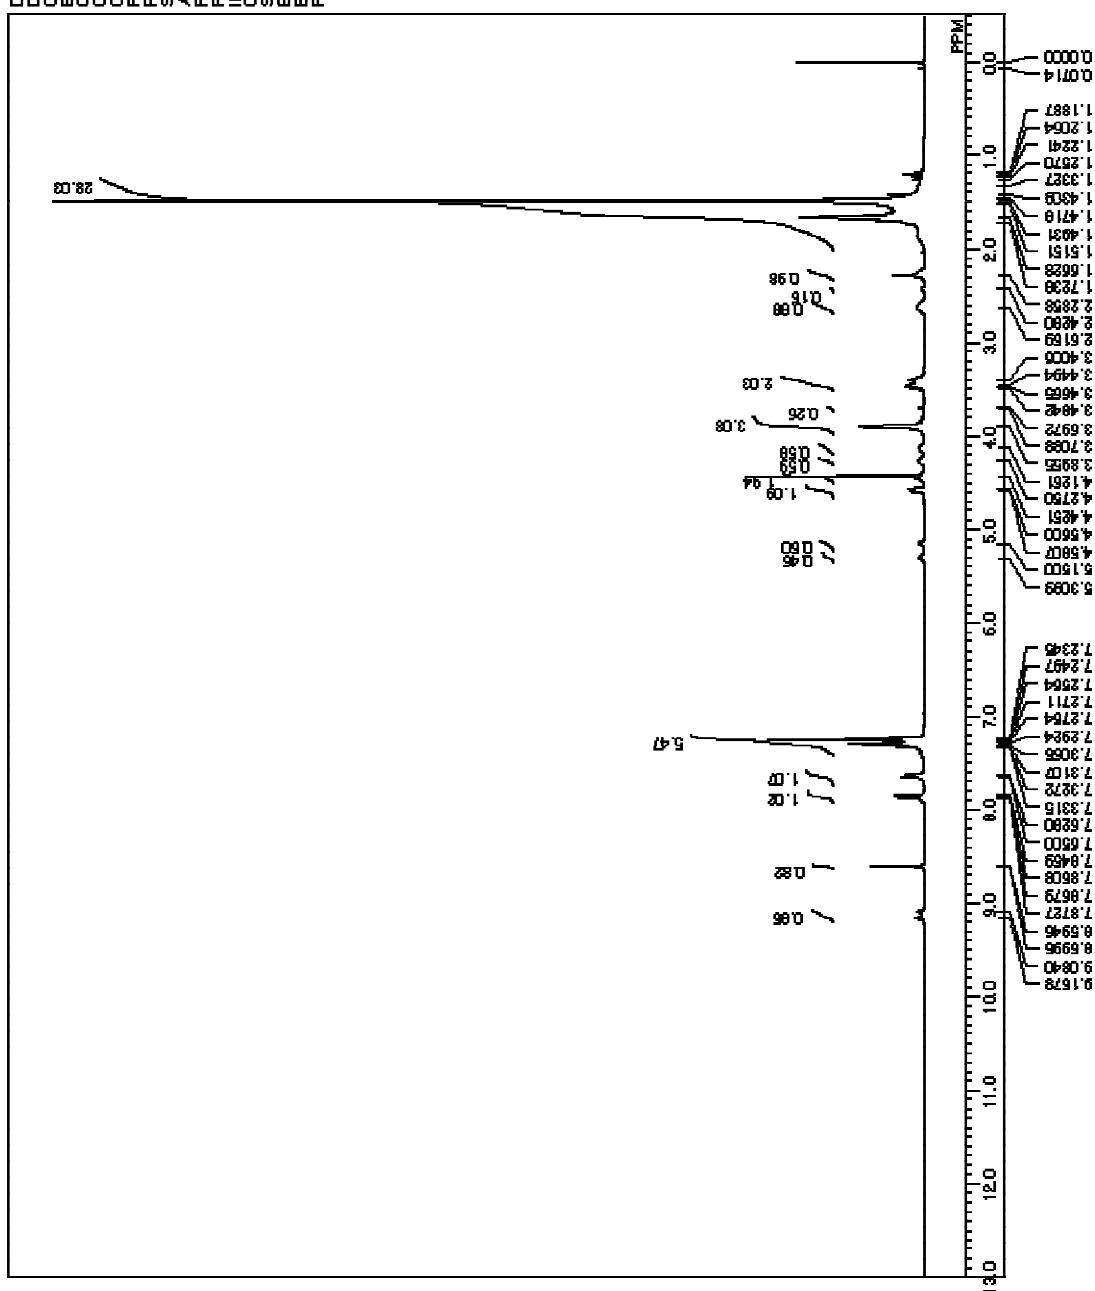

Wed Sep 21 21:05:05 2005  
 C:\MY Documents\BLA77-1\1\NMR.AL4006

NAME  
 1H  
 NDIN

398.055 MHz  
 124.00 KHz  
 10500.00 Hz  
 32768  
 7993.60 Hz  
 32  
 4.0553 sec  
 2.9010 sec  
 3.50 usec

05.8 c  
 CDCL3  
 0.00 ppm  
 0.12 Hz  
 1.4

DATEIM  
 DFILE  
 OBSJUC  
 EXM000  
 CQFR  
 CBSSET  
 OBSFIN  
 POINT  
 FREQU  
 SCANS  
 ACQTIM  
 PULP  
 IRN1  
 OTEMP  
 SLVNT  
 EXREF  
 BF  
 RGAIN

25.37

1.02  
 0.93  
 4.00  
 3.02  
 1.00  
 1.02  
 0.89

6.00  
 1.12  
 1.08  
 1.00

0.0000  
 1.2652  
 1.3375  
 1.4510  
 1.4980  
 1.5420  
 1.5493  
 1.5609  
 1.5707  
 1.6154  
 1.6439  
 1.6518  
 1.6664  
 1.6817  
 1.6890  
 1.7056  
 1.7323  
 1.7356  
 1.7635  
 1.7857  
 2.0484  
 2.1155  
 2.5195  
 3.0056  
 3.0622  
 3.3760  
 3.3854  
 3.4008  
 3.4159  
 3.4281  
 3.4439  
 3.5276  
 3.5815  
 3.8815  
 4.4254  
 4.5502  
 4.5557  
 4.5649  
 4.5704  
 4.5755  
 4.5813  
 5.0384  
 5.1879  
 7.2301  
 7.2558  
 7.2658  
 7.2900  
 7.2967  
 7.3034  
 7.3056  
 7.3107  
 7.3211  
 7.3248  
 7.3291  
 7.5719  
 7.5914  
 7.8258  
 7.8477  
 8.5555

PPM

13.0  
 12.0  
 11.0  
 10.0  
 9.0  
 8.0  
 7.0  
 6.0  
 5.0  
 4.0  
 3.0  
 2.0  
 1.0  
 0.0

MeO<sub>2</sub>C

Boc

OBn

1B

Wed Oct 12 15:26:18 2005  
C:\My Documents\人77-1\NMR AL400M

D:ATM  
DRFLI  
ORNUC  
EXMOD  
OFFR  
OBSET  
OBFIN  
POINT  
FREQU  
SCANS  
ACQTM  
PD  
FWI  
IRN  
OTEMP  
SLVINT  
EXREF  
BF  
RGAIN

100.40 MHz  
125.00 KHz  
10500.00 Hz  
32768  
27172.80 Hz  
111.4  
1.2000 sec  
1.7940 sec  
5.90 usec  
25.3 c  
CDCL3  
77.00 ppm  
0.12 Hz  
32

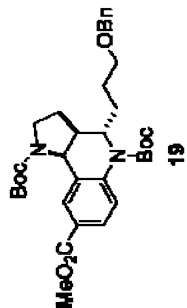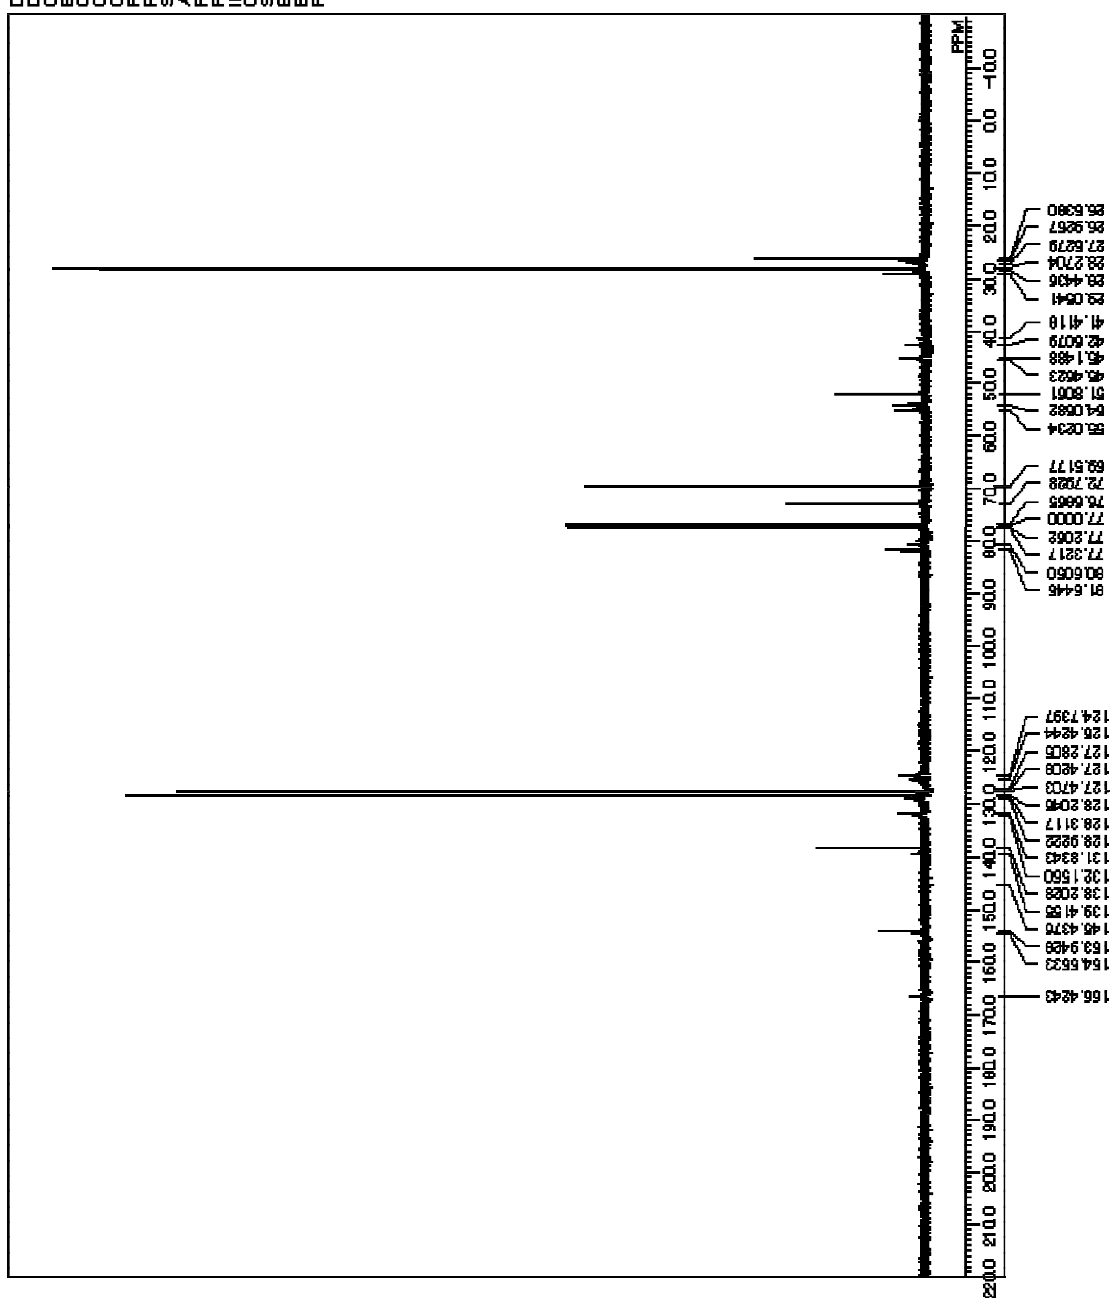

Fri Oct 14 22:17:33 2005  
 C:\My Documents\人77-1\NMR AL400M

1H  
 NMR  
 399.65 MHz  
 124.00 KHz  
 10500.00 Hz  
 32768  
 7993.60 Hz  
 8  
 4.093 sec  
 2.9010 sec  
 5.90 usec  
 26.5 c  
 CDCl<sub>3</sub>  
 0.00 ppm  
 0.12 Hz  
 8  
 DATIM  
 DBFILE  
 EXMOD  
 OFR  
 OBSET  
 OFEIN  
 POINT  
 FREQU  
 SCANS  
 ACQTIM  
 PD  
 FWT  
 IRN  
 OTEMP  
 SLVINT  
 EXREF  
 BF  
 RGAIN

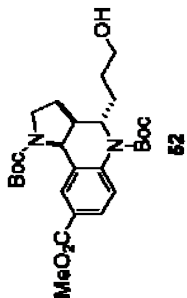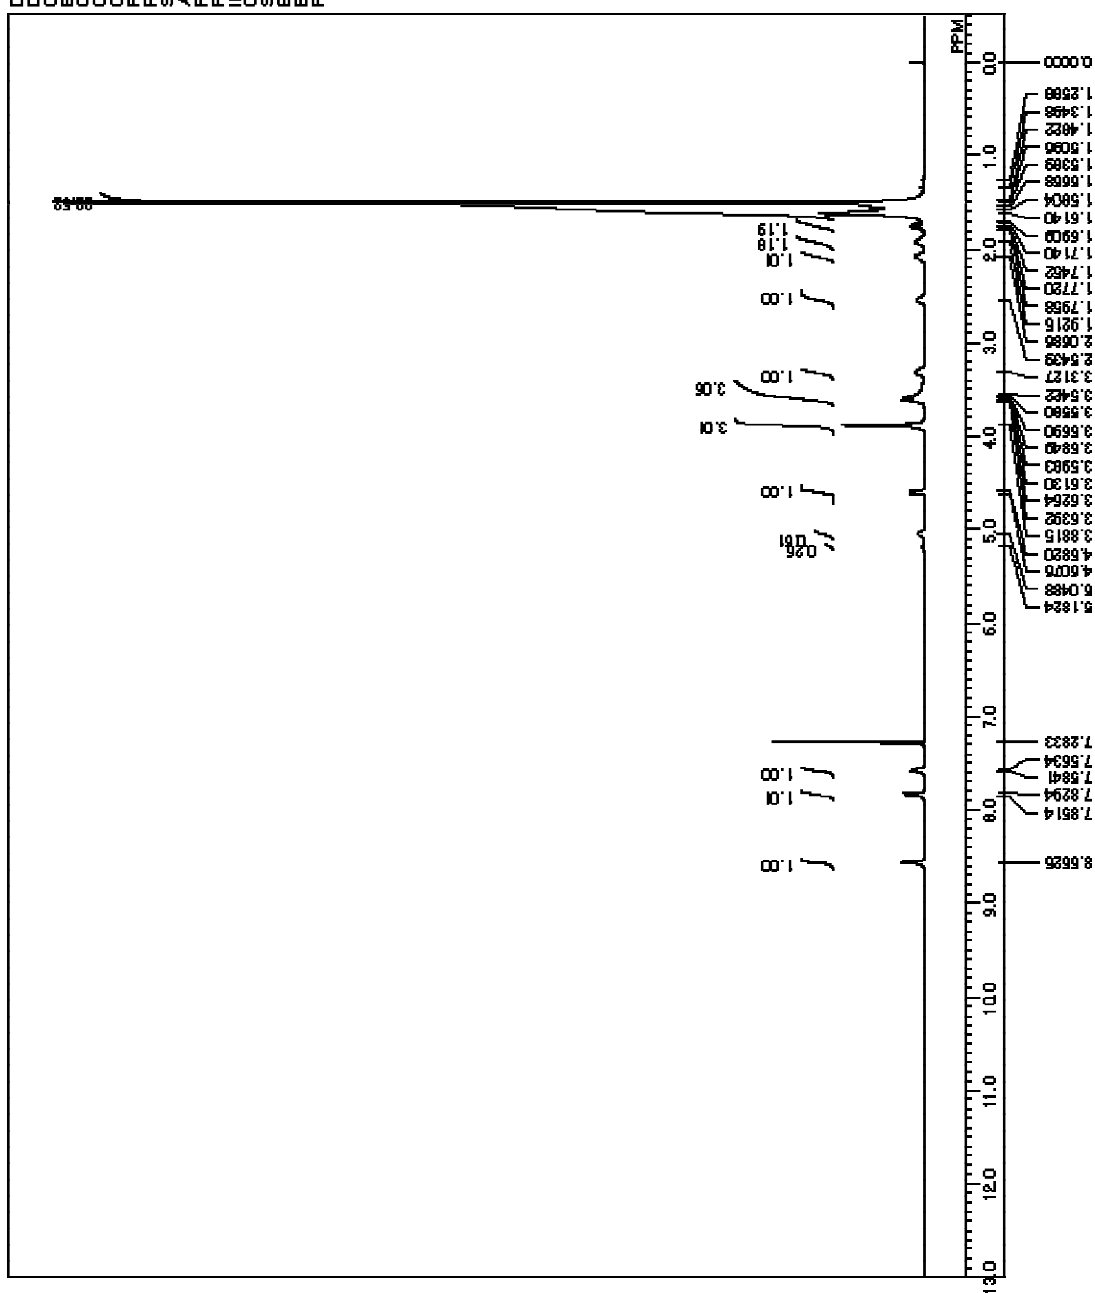

Set Oct 15 08:54:29 2005  
 C:\My Documents\77-1\NMR AL400M

D:ATIM  
 DRFILE  
 ORNJUC  
 EXMIDD  
 OFR  
 OBSET  
 OFEIN  
 POINT  
 FREQUL  
 SCANS  
 ACQTIM  
 PD  
 FWT  
 IRN  
 OTEMP  
 SLVINT  
 EXREF  
 BF  
 RGAIN

100.40 MHz  
 125.00 KHz  
 10500.00 Hz  
 32768  
 27173.80 Hz  
 12608  
 1.2069 sec  
 1.7940 sec  
 5.90 usec  
 25.2 c  
 CDCL3  
 0.00 ppm  
 0.12 Hz  
 22

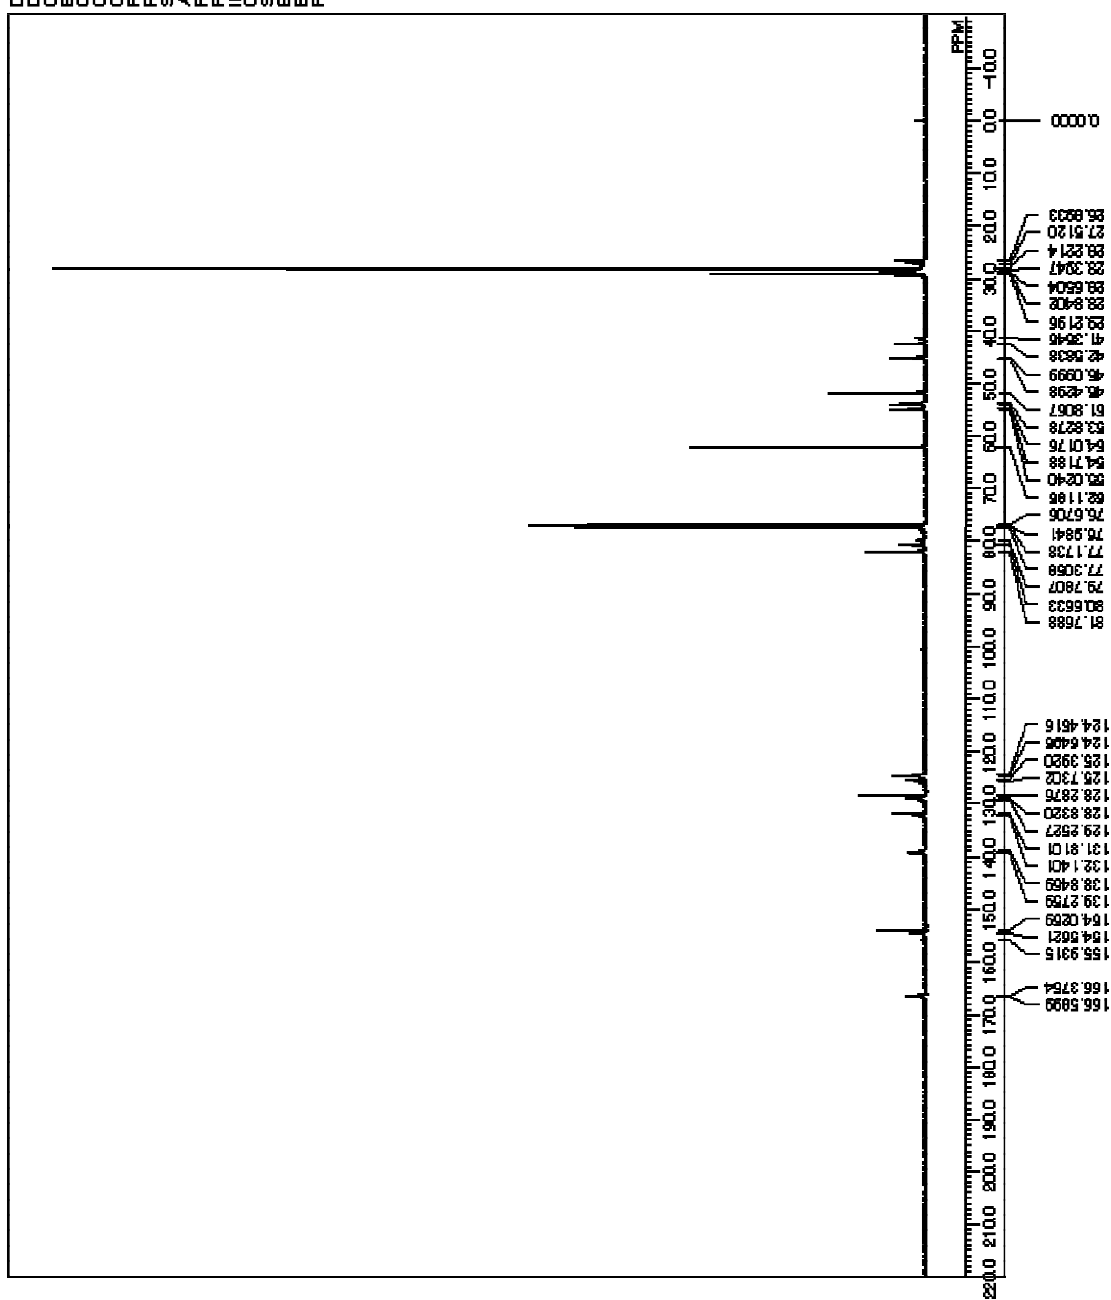



Thu Sep 22 22:16:57 2005  
 C:\My Documents\771\1\NMR AL400M

D:\ATM  
 D:\FILE  
 0\BNJC  
 EXMOD  
 OFR  
 0\BSET  
 0\BFIN  
 POINT  
 FREQUL  
 SCANS  
 ACQTIM  
 PD  
 FWT  
 IRN  
 0\TEMP  
 SLVINT  
 EXREF  
 BF  
 RGAIN

399.65 MHz  
 124.00 KHz  
 10500.00 Hz  
 32768  
 7993.60 Hz  
 16  
 4.093 sec  
 2.9010 sec  
 5.90 usec  
 25.3 c  
 0.00 ppm  
 0.12 Hz  
 16

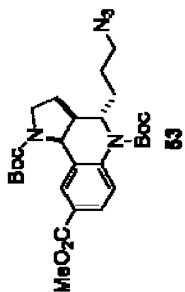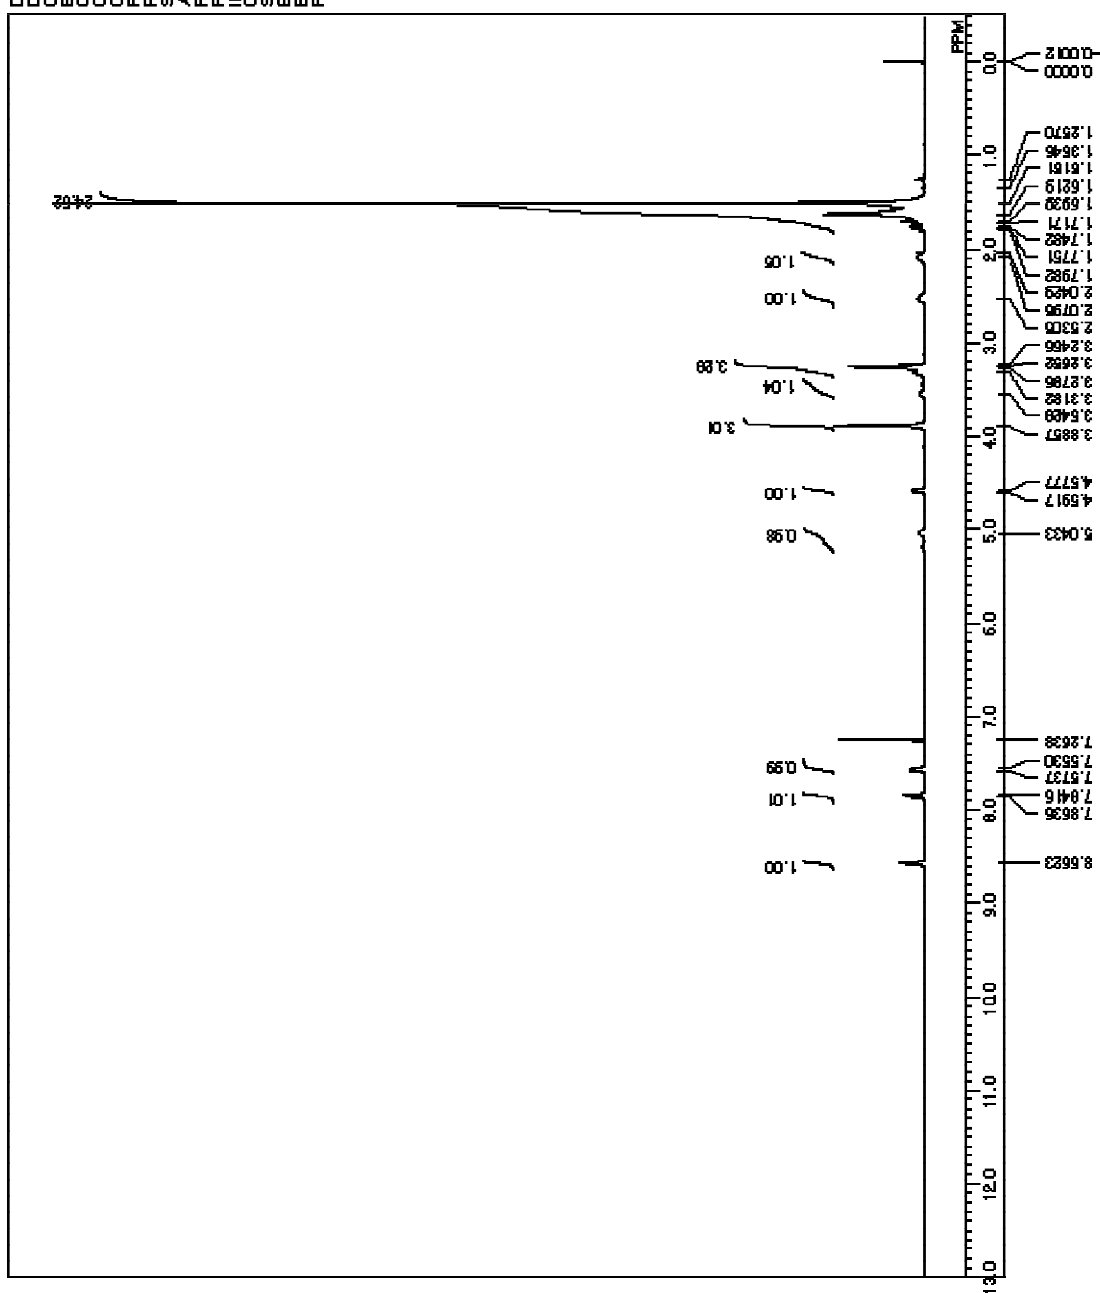

Wed Oct 19 08:56:16 2005  
 C:\My Documents\人77-1\NMR AL400M

D:ATM  
 DRFLI  
 ORNJUC  
 EXMIDD  
 OFR  
 OBSET  
 OBFET  
 POINT  
 FREQUL  
 SCANS  
 ACQTIM  
 PD  
 FWT  
 IRN  
 OTEMP  
 SLVINT  
 EXREF  
 BF  
 RGAIN

100.40 MHz  
 126.00 KHz  
 10500.00 Hz  
 32768  
 27173.80 Hz  
 12285  
 1.2069 sec  
 1.7940 sec  
 5.90 usec  
 24.6 c  
 CDCL3  
 77.00 ppm  
 0.12 Hz  
 22

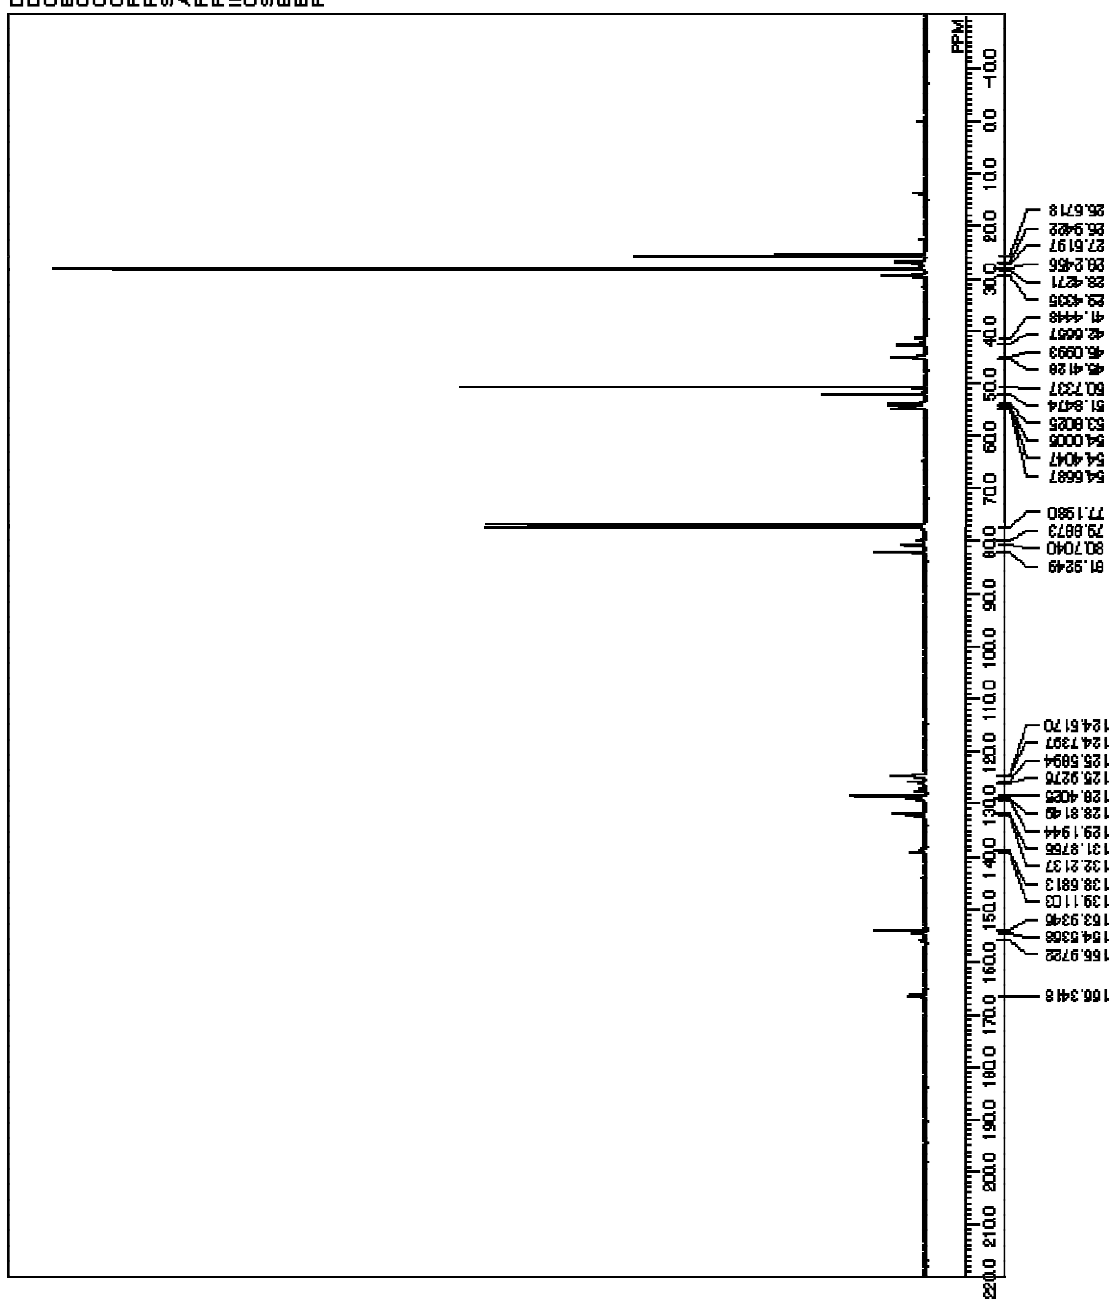

Wed Oct 19 22:44:34 2005  
C:\My Documents\人77-1\1NMR AL400M

D:ATM  
DEFILE  
DEINJC  
EXMIDD  
OFER  
OBSET  
OBFIN  
POINT  
FREQU  
SCANS  
ACQTIM  
PD  
PWI  
IRN  
OTEMP  
SLVINT  
EXREF  
BF  
RGAIN

399.65 MHz  
124.00 KHz  
10500.00 Hz  
32768  
7993.60 Hz  
16  
4.093 sec  
2.9010 sec  
5.90 usec

25.5 c  
CDCL3  
0.00 ppm  
0.46 Hz  
10

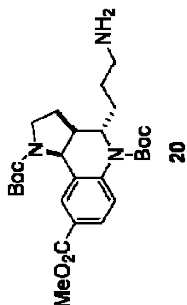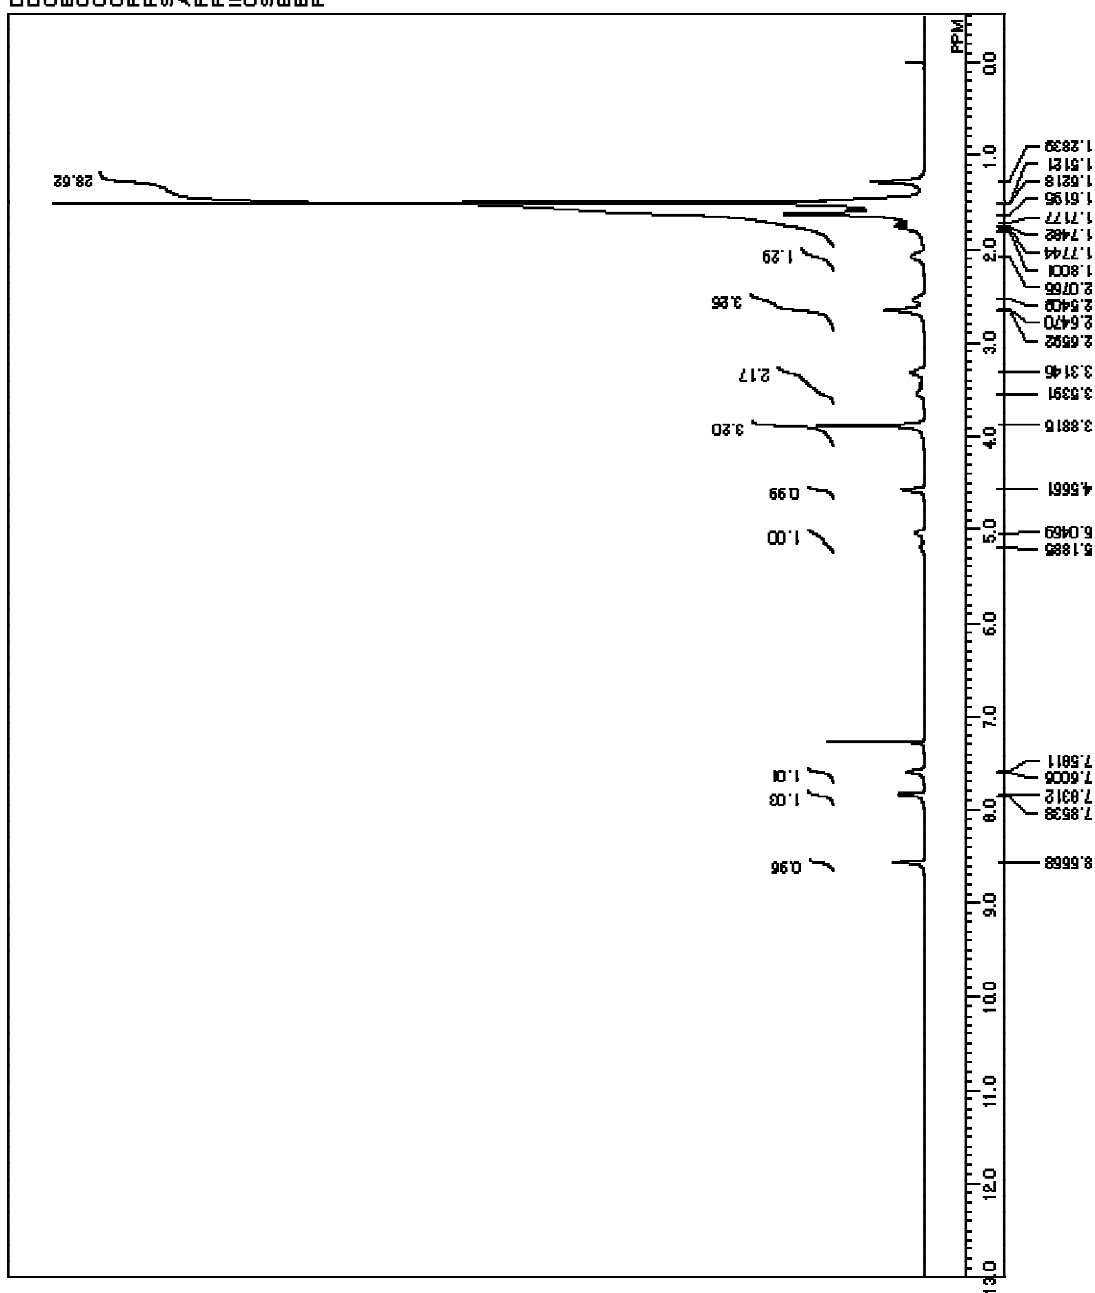

Thu Oct 20 09:56:22 2005  
 C:\My Documents\77-1\NMR AL400M

D:ATIM  
 D:FNLC  
 O:BNJC  
 EXMIDD  
 OFR  
 O:BSST  
 O:BFIN  
 POINT  
 FREQUL  
 SCANS  
 ACQTIM  
 PD  
 FWT  
 IRN  
 O:TEMP  
 SLVINT  
 EXREF  
 BF  
 RGAIN

100.40 MHz  
 125.00 KHz  
 10500.00 Hz  
 32768  
 27173.80 Hz  
 12212  
 1.2000 sec  
 1.7940 sec  
 5.90 usec  
 24.4 c  
 CDCL3  
 77.00 ppm  
 0.46 Hz  
 24

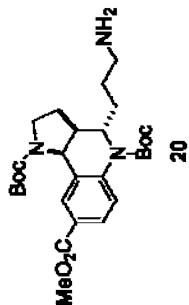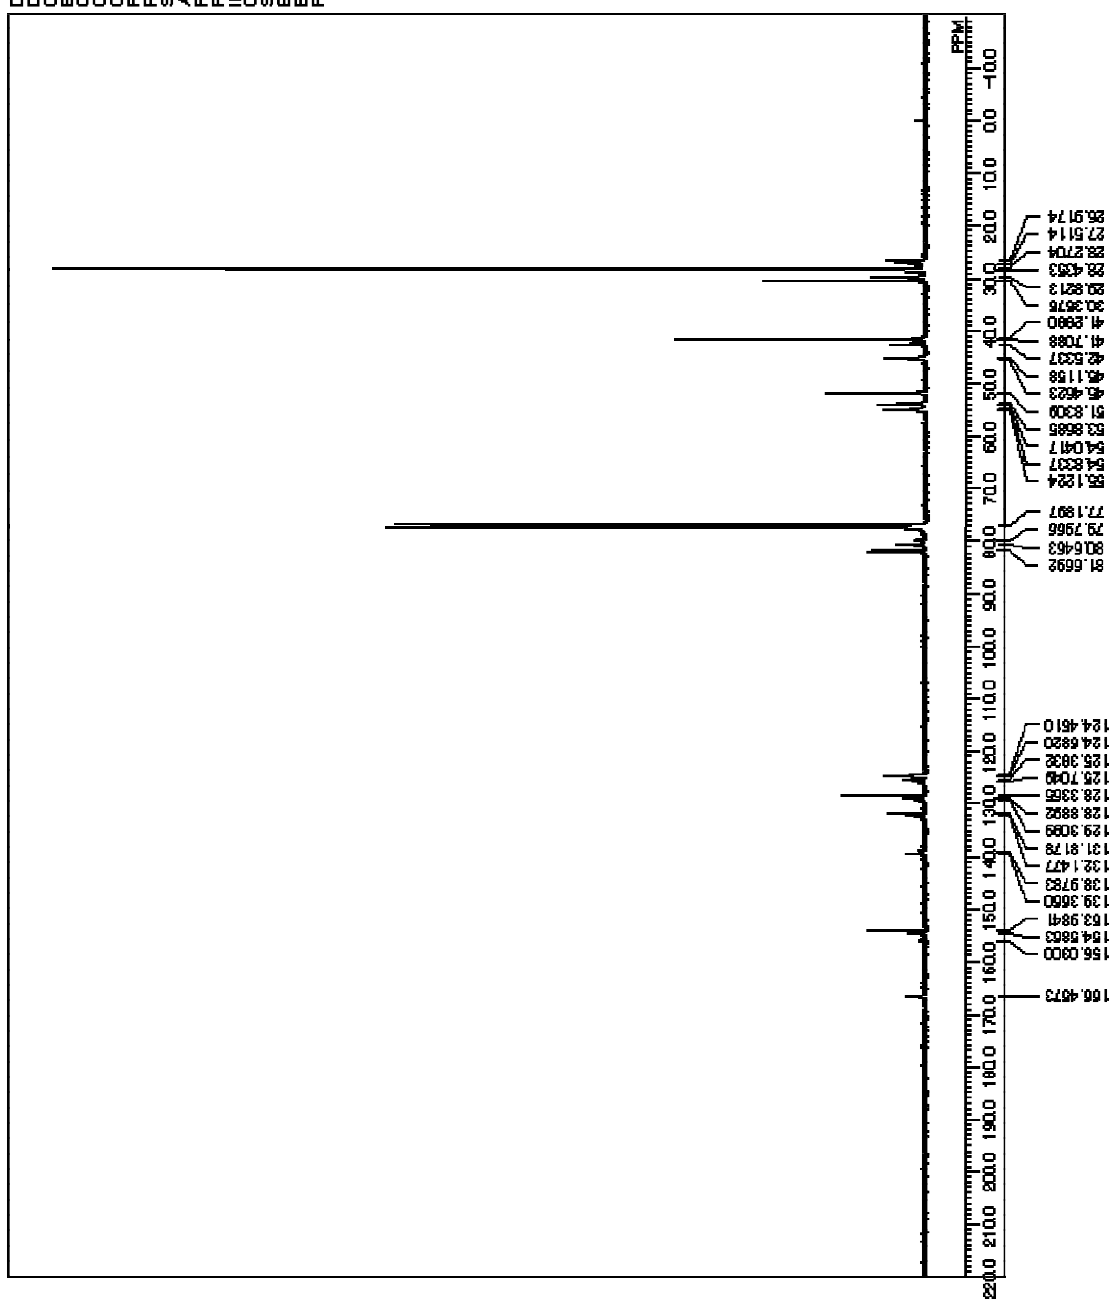

Thu Oct 20 22:15:25 2005  
 C:\Mwv Documents\177-1\1JNMFR-AL400M

1H  
 NDN  
 300.05 MHz  
 124.00 KHz  
 10500.00 Hz  
 23798  
 7993.60 Hz  
 32  
 4.0683 sec  
 2.9010 sec  
 5.90 usec  
 25.9 c  
 CD3OD  
 3.30 ppm  
 0.12 Hz  
 16

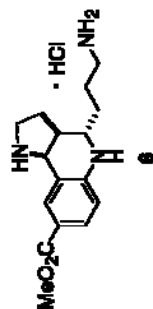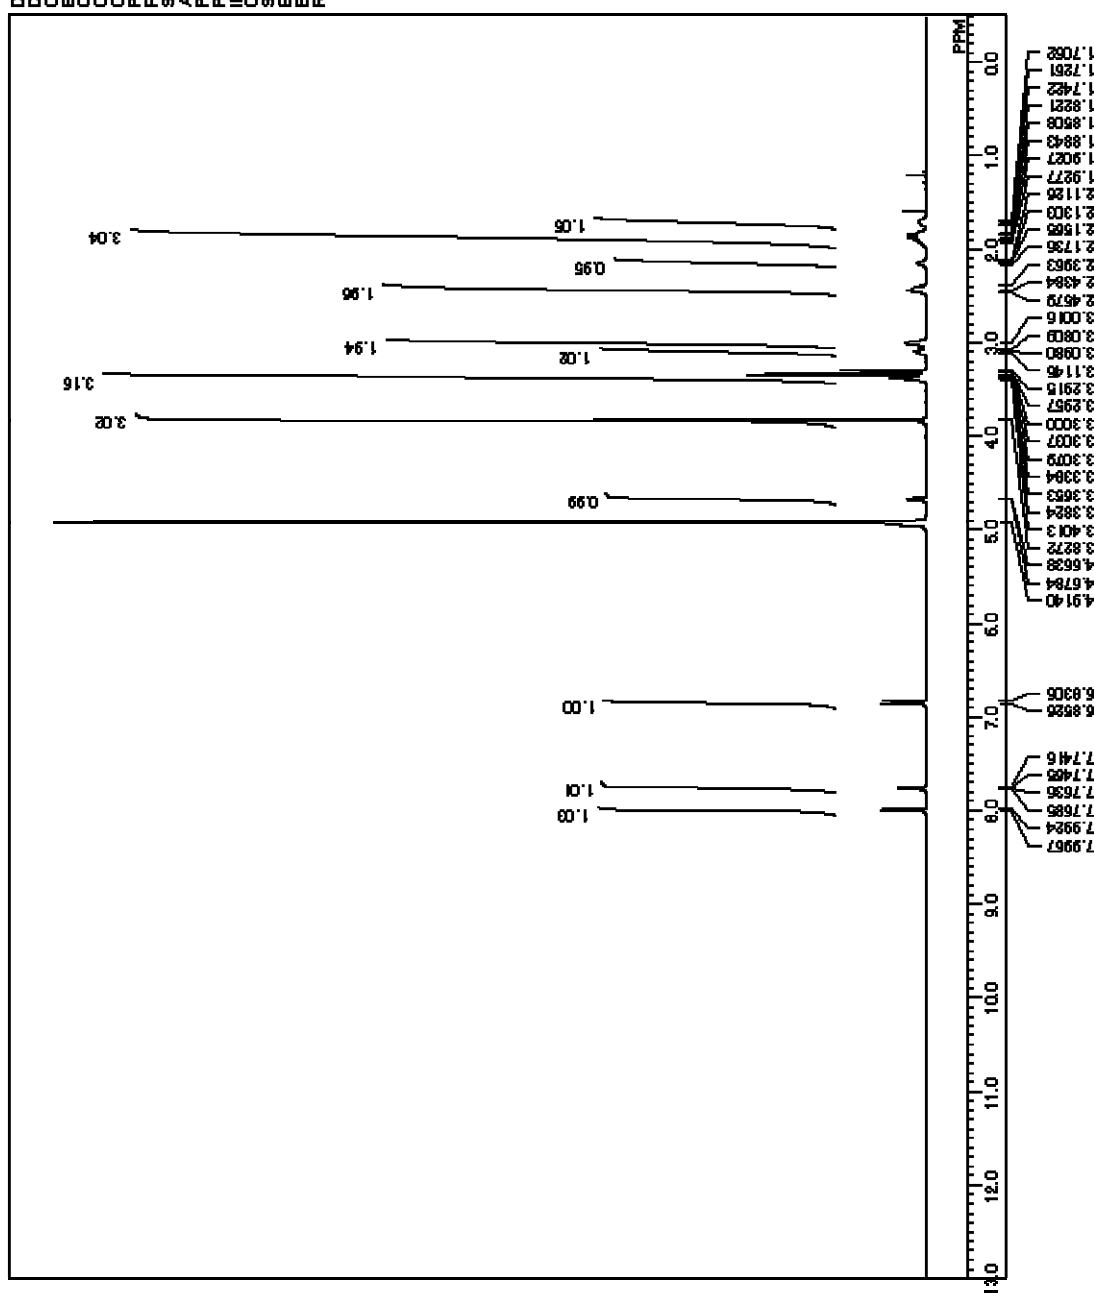

Wed Oct 06 23:07:02 2004  
 C:\My Documents\人ア\11JANMR AL40064

D:ATM  
 D:FILE  
 D:BLVD  
 EXAMOD  
 DFR  
 DBSET  
 DBFTN  
 POINT  
 FREQUL  
 SOLANS  
 ACQTM  
 PD  
 PWD  
 IRN  
 QTEMP  
 SLANT  
 EXREF  
 BF  
 REAIN

100.40 MHz  
 125.00 KHz  
 10500.00 Hz  
 32768  
 27173.90 Hz  
 1.000  
 1.2059 sec  
 1.7940 sec  
 5.50 usec  
 23.8 o  
 CD3OD  
 40.00 ppm  
 0.10 Hz  
 21

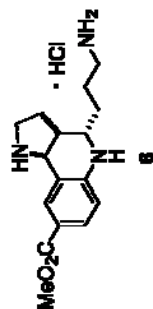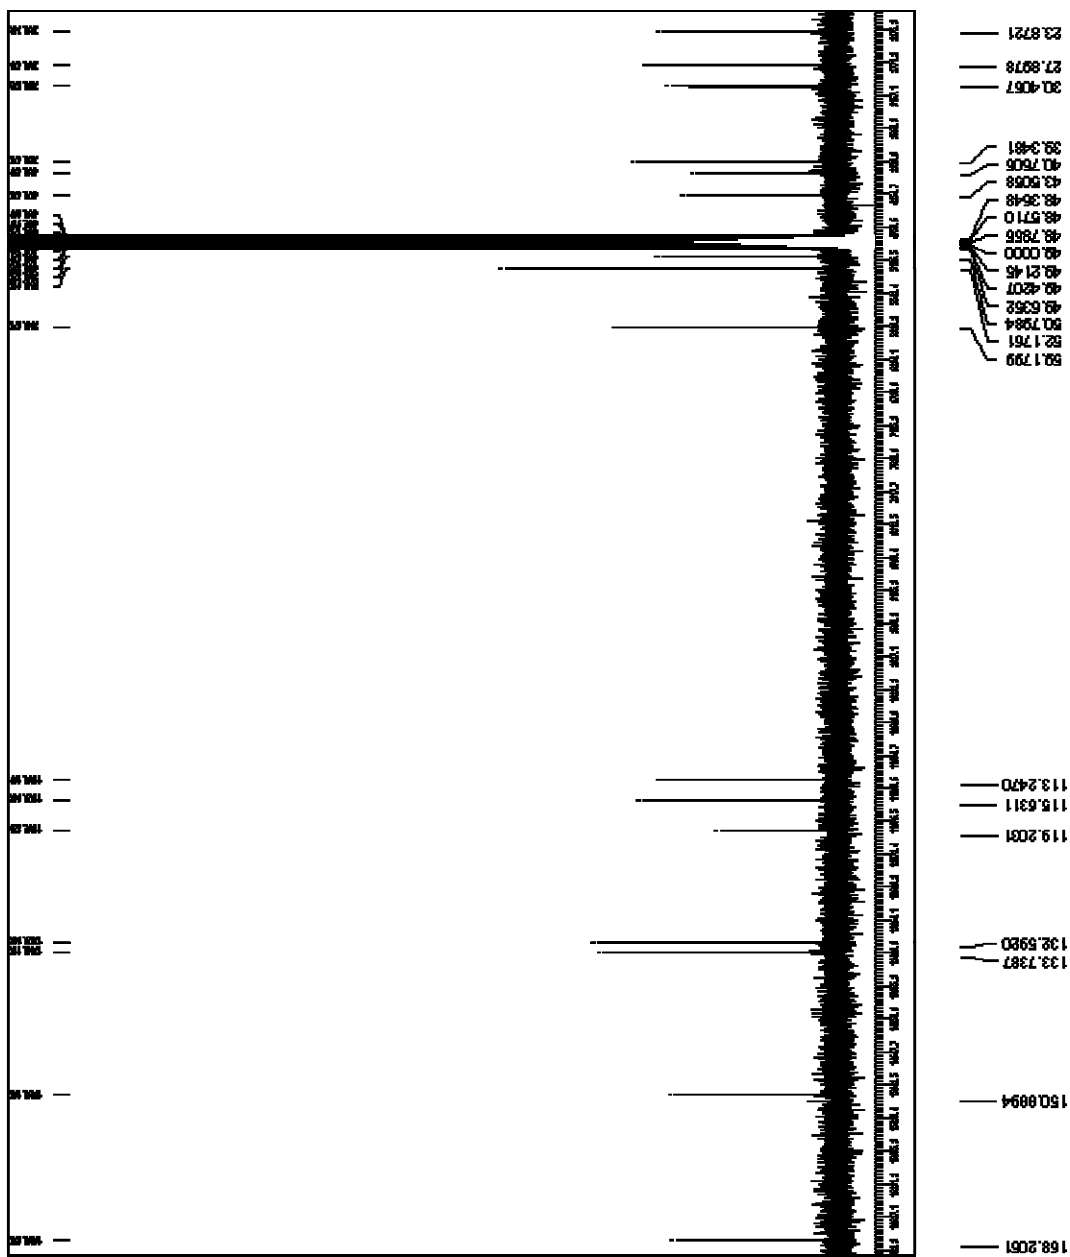

Fri Jan 20 08:51:02 2006  
C:\My Documents\人77-1\NMR AL400M

D:ATM  
DFILE  
ORNUC  
EXMOD  
OFER  
OBSET  
OBFIN  
POINT  
FREQU  
SCANS  
ACQTM  
PD  
PWI  
IRN  
OTEMP  
SLVINT  
EXREF  
BF  
RGAIN

399.65 MHz  
124.00 KHz  
10500.00 Hz  
32768  
7993.60 Hz  
16  
4.093 sec  
2.9010 sec  
5.90 usec  
22.1 c  
ODL3  
0.00 ppm  
0.12 Hz  
7

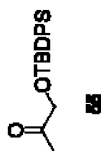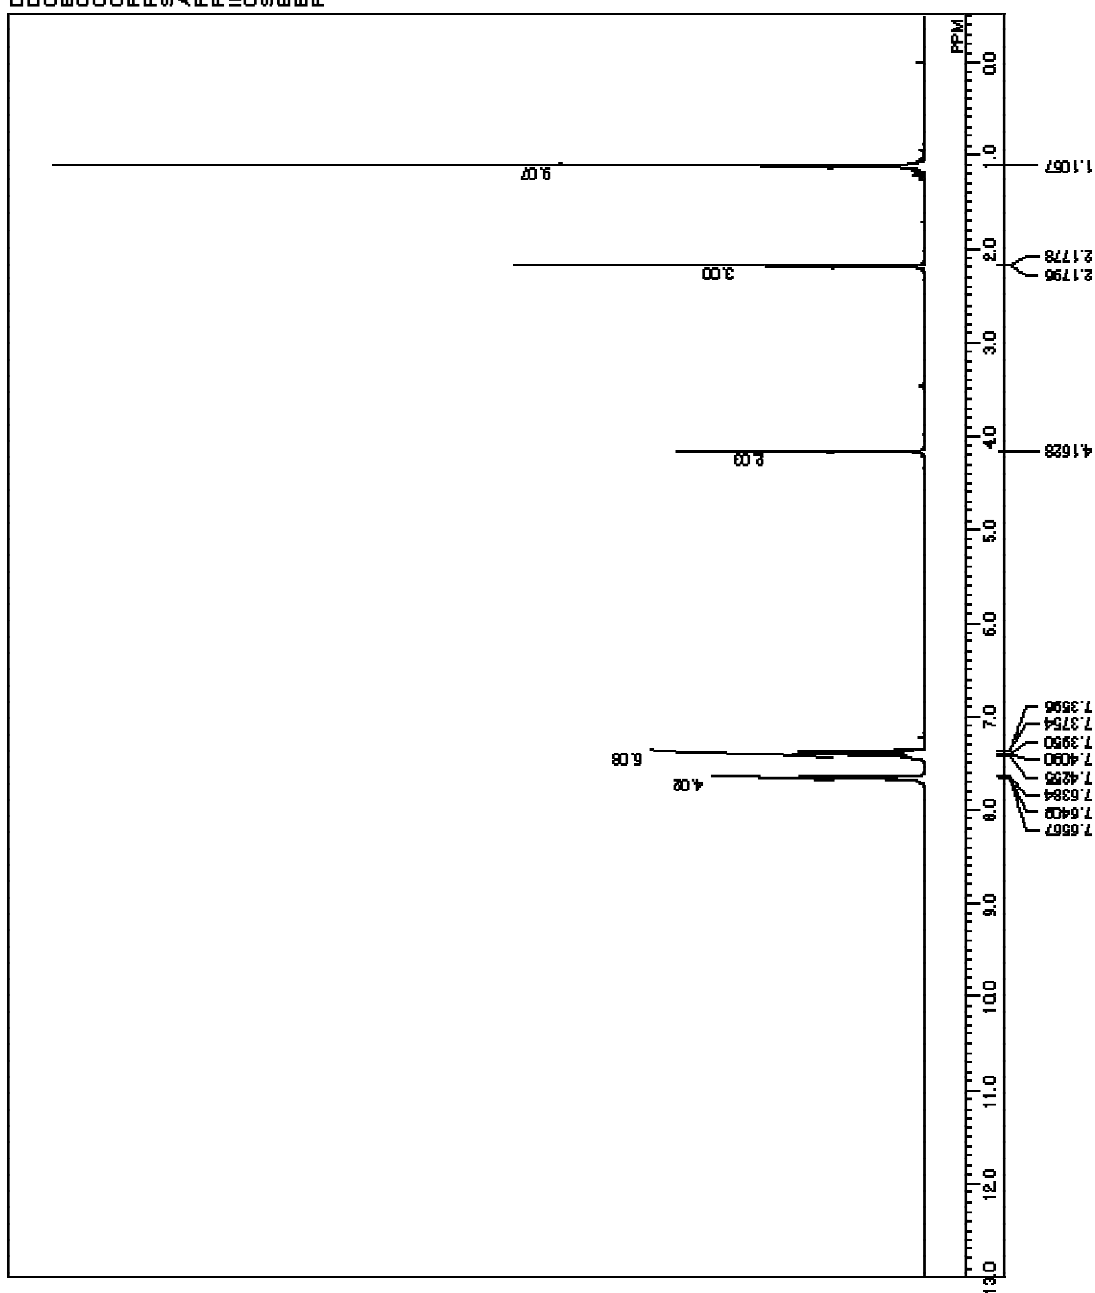

Fri Jan 20 08:56:27 2006  
C:\My Documents\人77-1\NMR AL400M

DATE\_1M  
DEFILE  
ORNUC  
EXMOD  
OFFR  
OBSET  
OBFIN  
POINT  
FREQU  
SCANS  
ACQTM  
PD  
PWI  
IRN  
OTEMP  
SLVINT  
EXREF  
BF  
RGAIN

100.40 MHz  
125.00 KHz  
10500.00 Hz  
32768  
27173.80 Hz  
124  
1.5000 sec  
1.7940 sec  
5.90 usec  
22.2 c  
CDCL3  
77.00 ppm  
0.12 Hz  
21

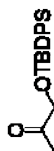

55

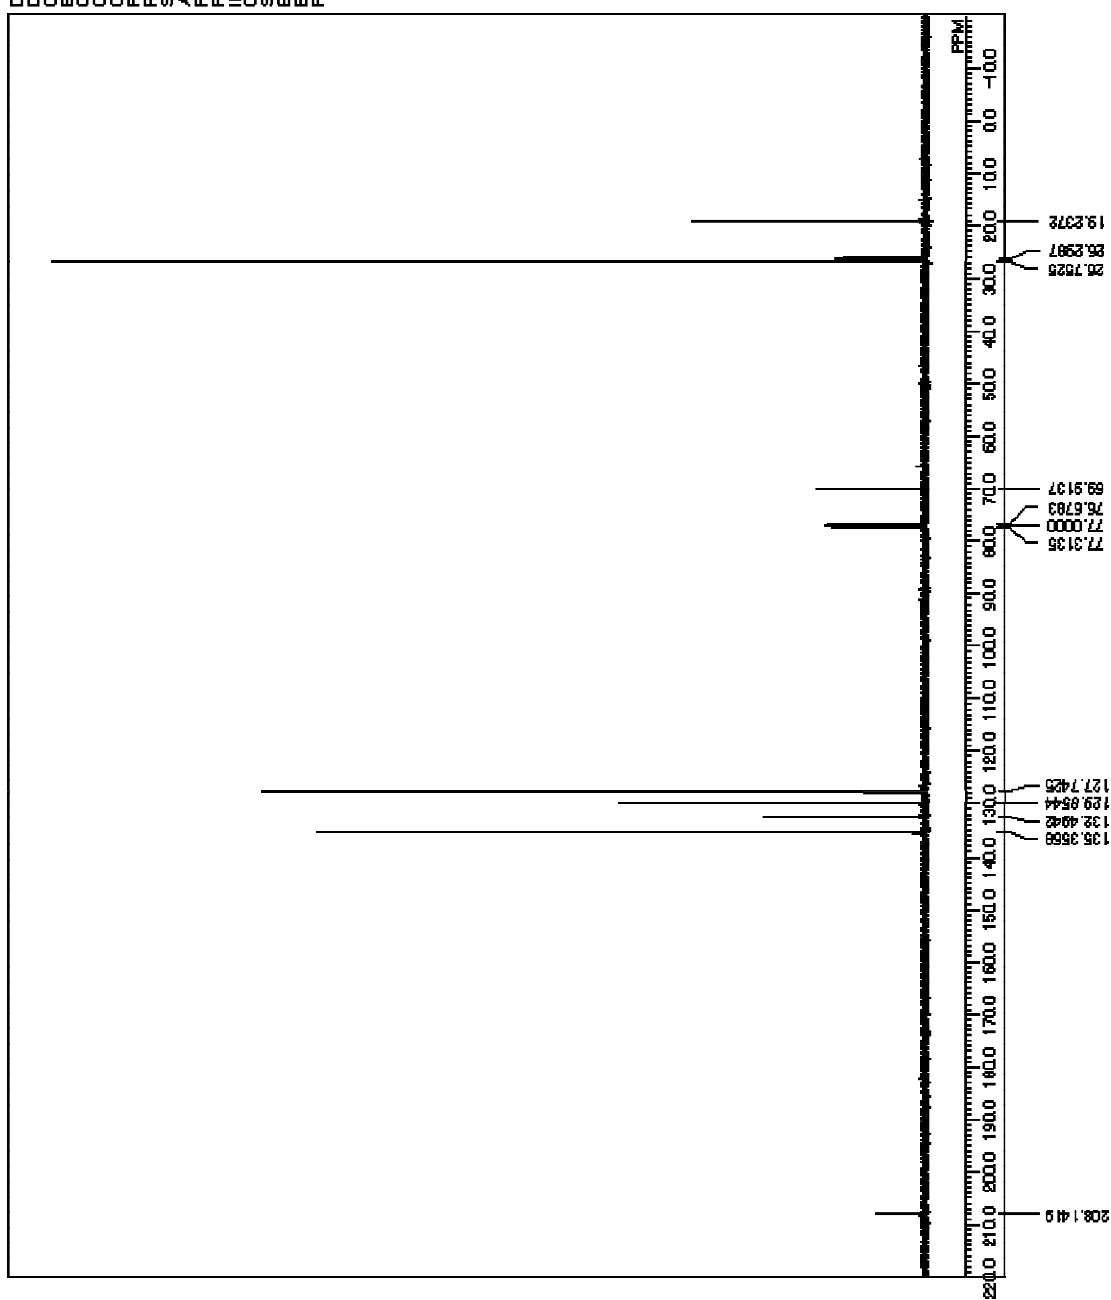



Wed Feb 01 17:15:48 2006  
C:\My Documents\人77-1\NMR AL400M

D:ATM  
DRFLC  
ORNUC  
EXMOD  
OFER  
OBSET  
OBFIN  
POINT  
FREQU  
SCANS  
ACQTM  
PD  
PWI  
IRN  
OTEMP  
SLVINT  
EXREF  
BF  
RGAIN

399.65 MHz  
124.00 KHz  
10500.00 Hz  
32768  
7993.60 Hz  
32  
4.093 sec  
2.9010 sec  
5.90 usec  
21.4 c  
CDCL3  
0.00 ppm  
0.12 Hz  
8

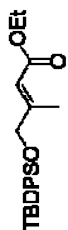

5b

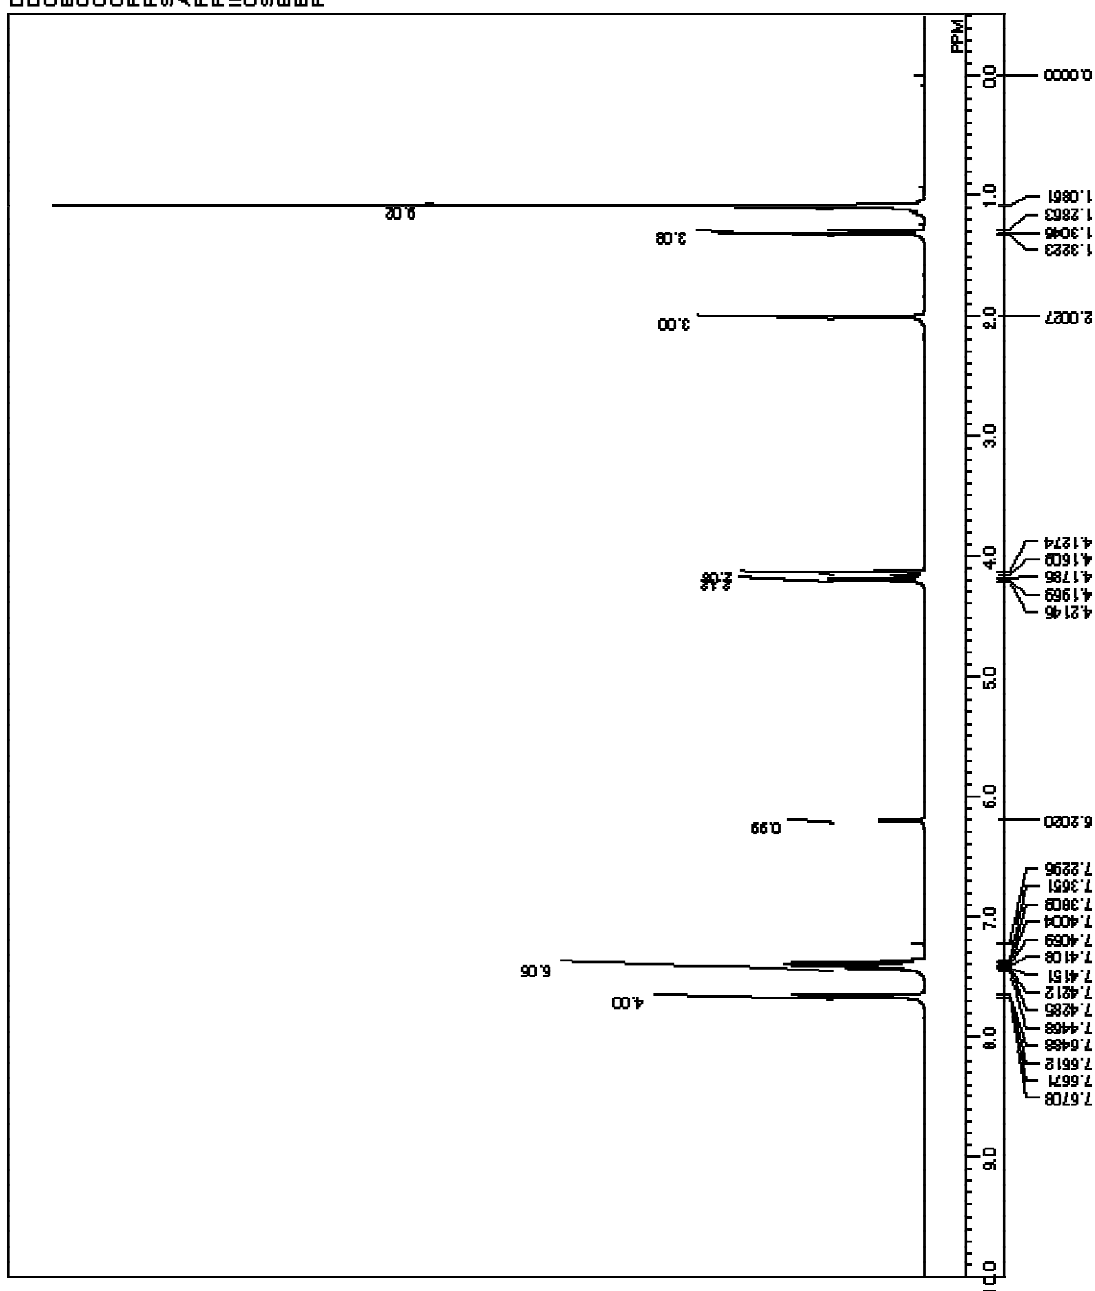

Wed Feb 01 17:23:38 2006  
C:\My Documents\人77-1\1NMR AL400M

D:ATIM  
DEFILE  
ORNUC  
EXMJD  
OFR  
OBSET  
OBFIN  
POINT  
FREQU  
SCANS  
ACQTIM  
PD  
PWI  
IRN  
OTEMP  
SLVINT  
EXREF  
BF  
RGAIN

100.40 MHz  
125.00 KHz  
10500.00 Hz  
32768  
27173.80 Hz  
128  
1.5000 sec  
1.7940 sec  
5.90 usec  
21.5 c  
CDCL3  
77.00 ppm  
0.46 Hz  
23

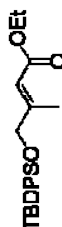

50

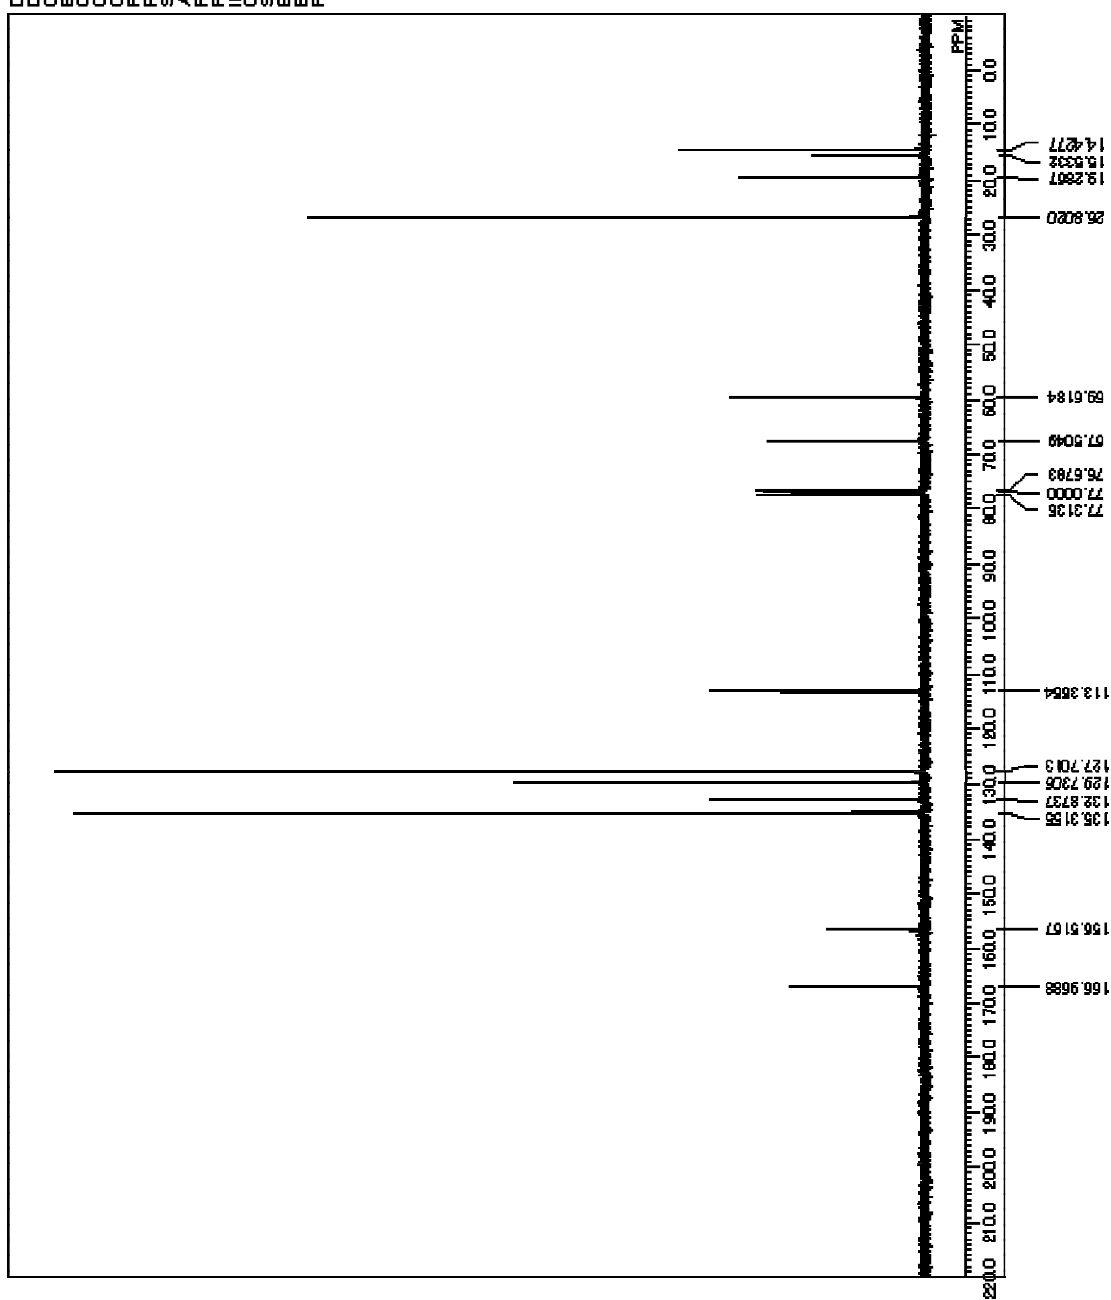

Sat Jan 21 00:05:04 2006  
C:\My Documents\人77-1\NMR AL400M

D:\TIM  
DRFILE  
ORNUC  
EXMOD  
OFER  
OBSET  
OBFET  
POINT  
FREQUL  
SCANS  
ACQTIM  
PD  
FWD  
IRN  
OTEMP  
SLVINT  
EXREF  
BF  
RGAIN

395.75 MHz  
124.00 KHz  
10277.00 Hz  
32768  
7919.95 Hz  
16  
4141.80  
2.6950 sec  
5.80 usec  
24.0 c  
000.3  
0.00 ppm  
0.12 Hz  
11

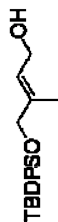

57

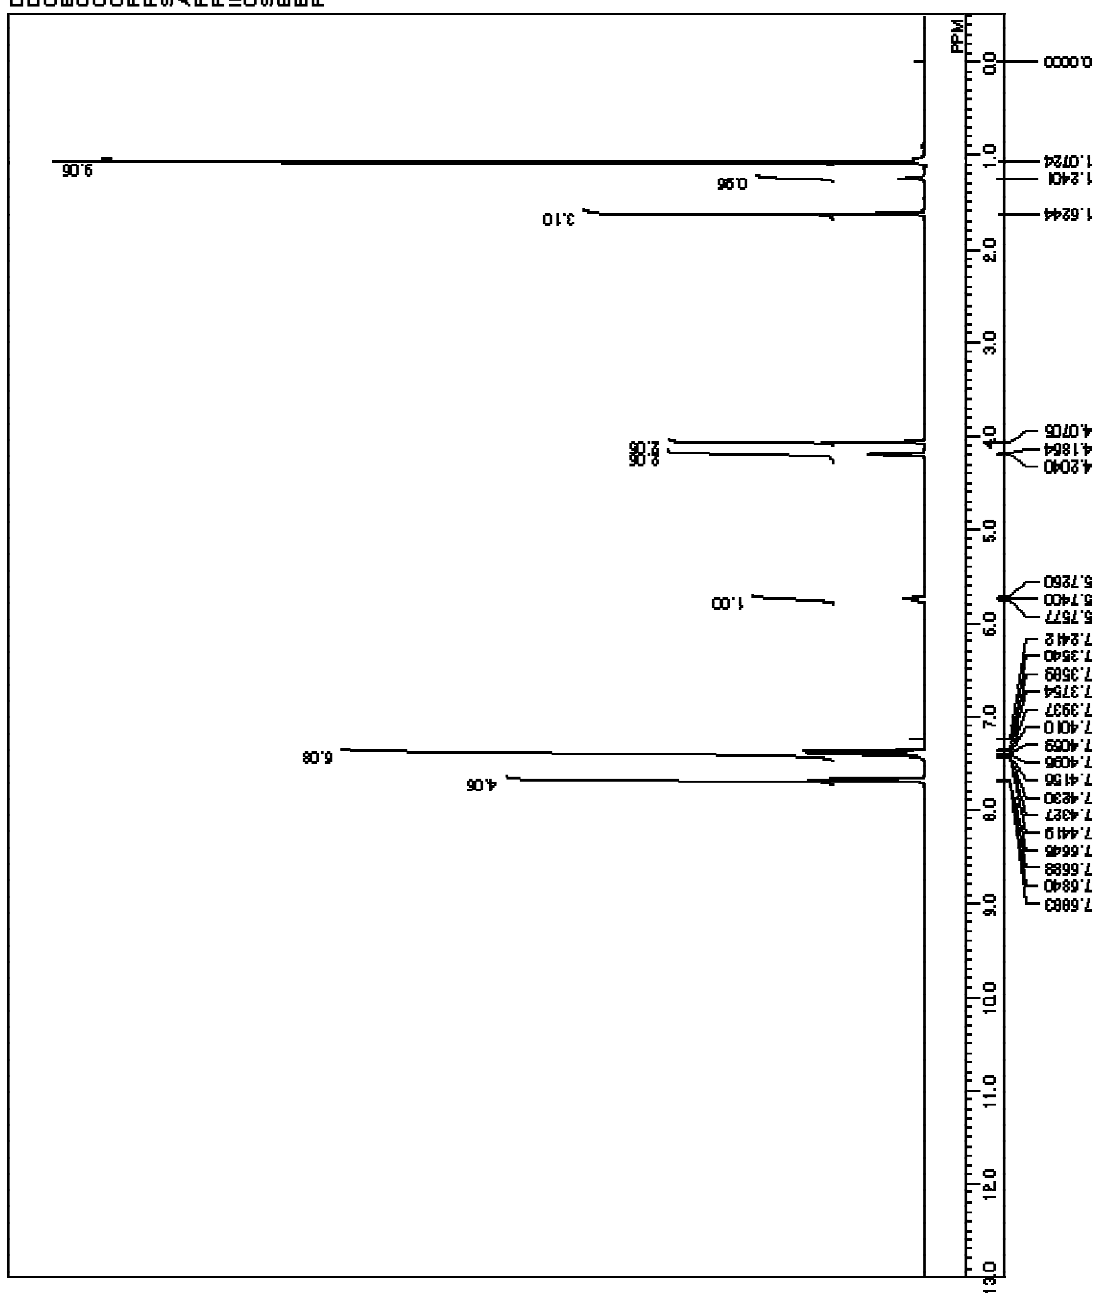



Fri Jan 20 13:25:41 2006  
 C:\My Documents\人77-1\NMR AL400M

1H  
 NMR  
 395.75 MHz  
 124.00 KHz  
 10277.00 Hz  
 32768  
 7919.95 Hz  
 16  
 4141.80  
 2.690 sec  
 5.80 usec  
 24.0 c  
 CDCl3  
 0.00 ppm  
 0.12 Hz  
 11  
 RGAIN

D:ATM  
 DRFILE  
 ORNJUC  
 EXMIDD  
 OFR  
 OBSET  
 OFEIN  
 POINT  
 FREQU  
 SCANS  
 ACQTM  
 PD  
 FWT  
 IRN  
 OTEMP  
 SLVINT  
 EXREF  
 BF  
 RGAIN

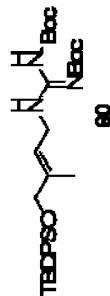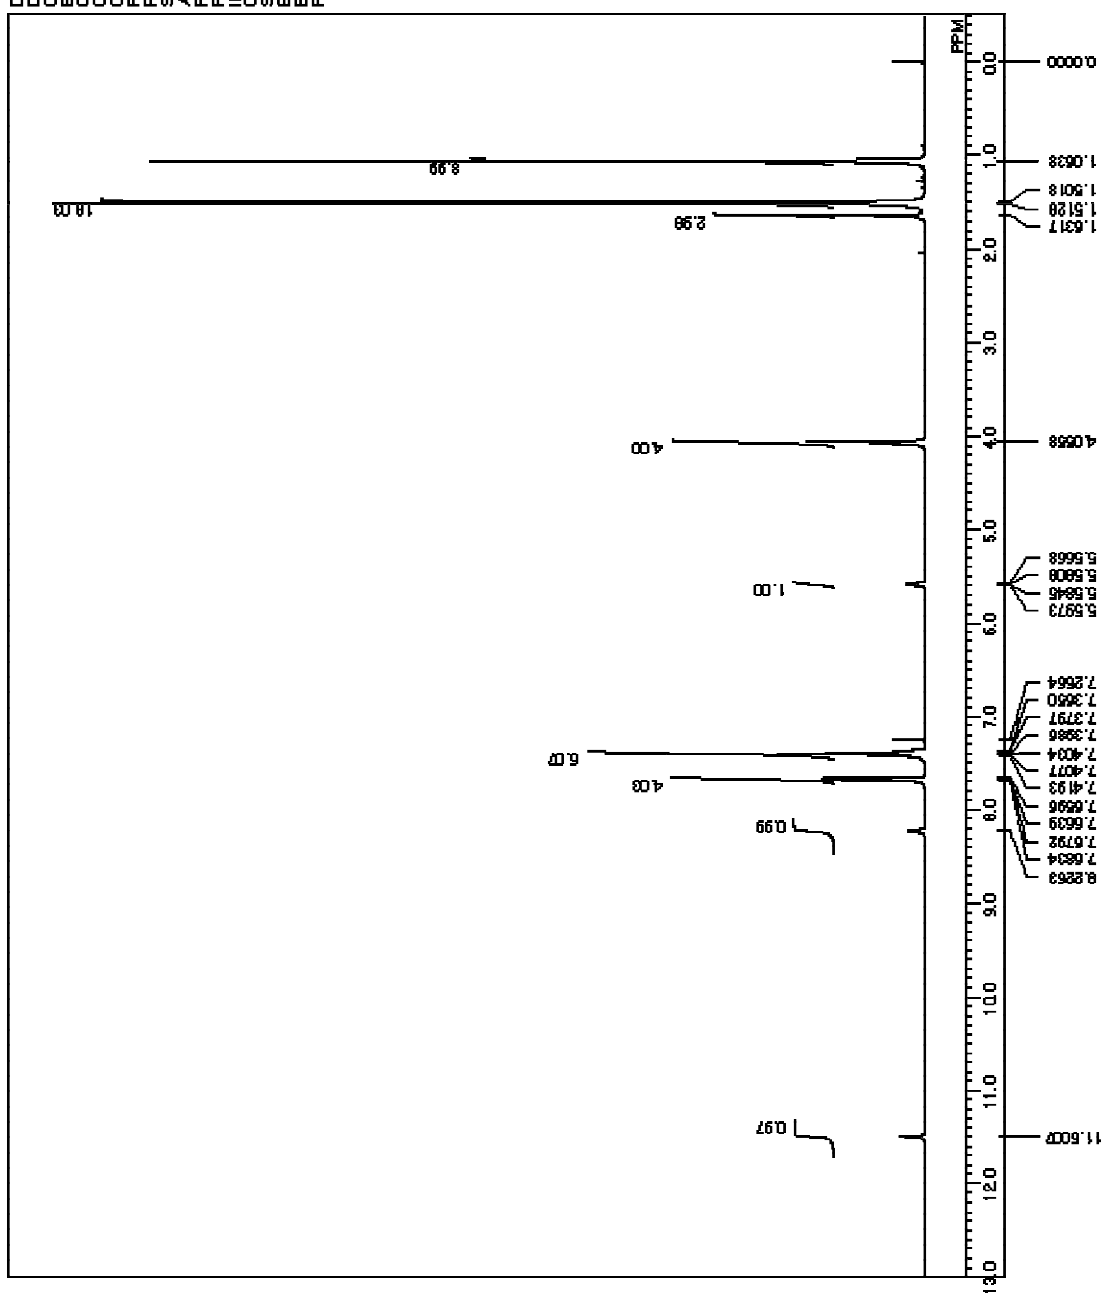

Fri Jan 20 13:37:02 2006  
D:\My Documents\人77-1\NMR AL 40064

DATIM  
DIRLE  
GENUD  
EXMID  
OFFR  
OBSET  
OBFIN  
POINT  
FREQU  
SDANS  
ACQTM  
RD  
PWI  
IRN  
GTEMP  
SLVNT  
EXREF  
BF  
RGAIN

96.46 MHz  
94.00 KHz  
10309.00 Hz  
32768  
26846.64 Hz  
502  
1.2206 sec  
1.7790 sec  
6.50 usec

25.4 o  
CDCL3  
77.00 ppm  
0.12 Hz  
24

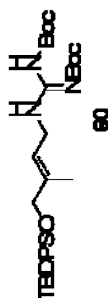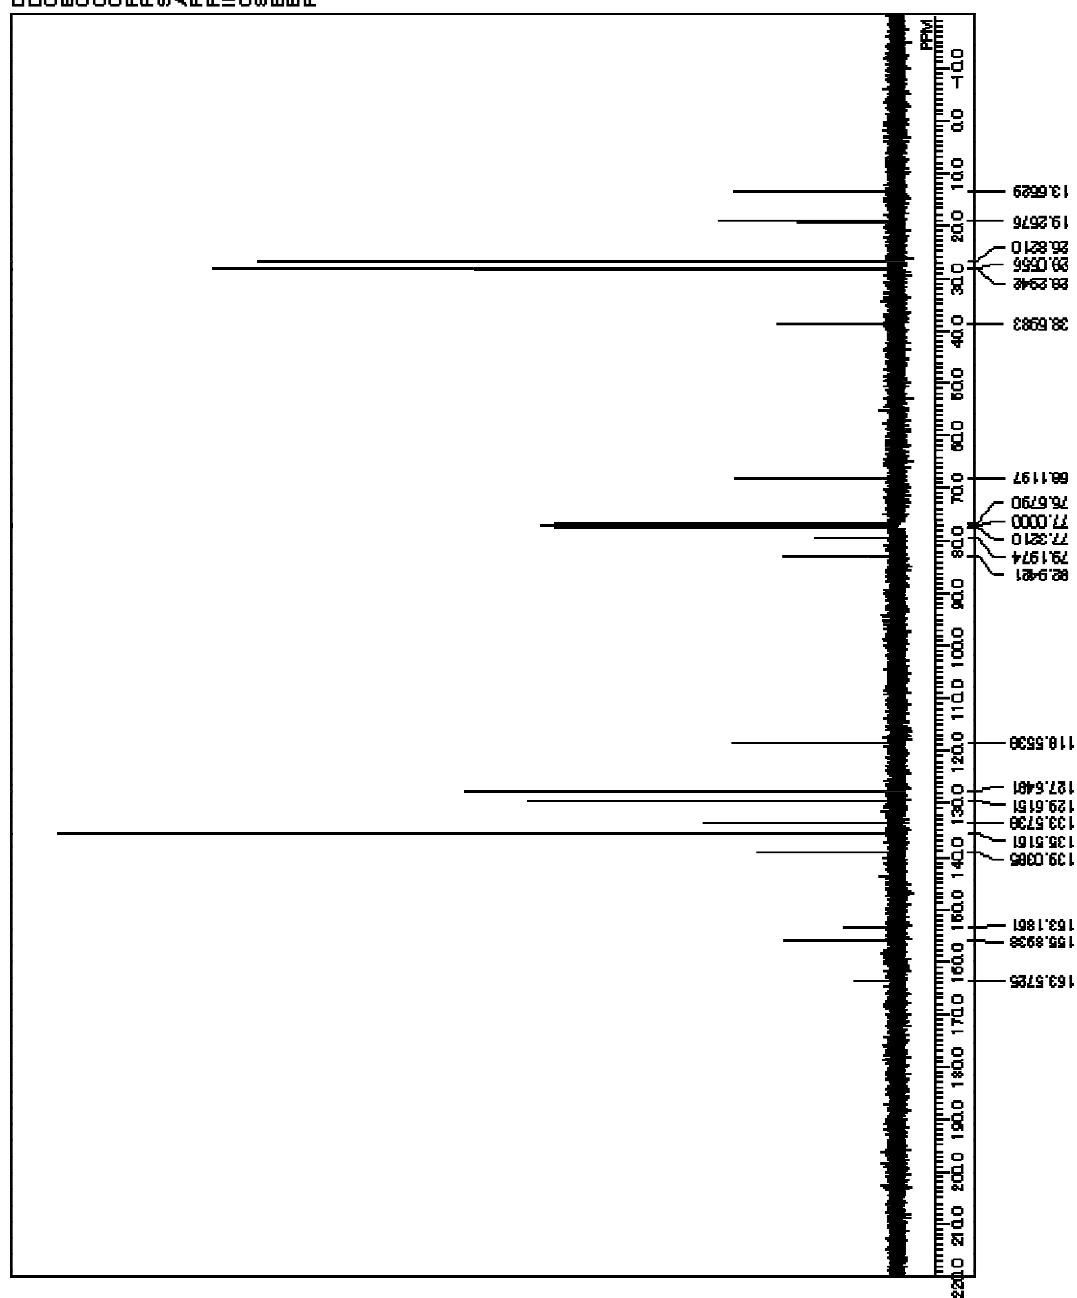

Thu Aug 06 08:39:11 2004  
 C:\My Documents\... \1H NMR AL4006

D:ATM  
 D:FILE  
 D:NUC  
 E:XMOD  
 O:PR  
 O:SET  
 O:BTIN  
 O:POINT  
 F:FREQ  
 S:SCAN  
 A:ADDM  
 R:RO  
 P:PM  
 I:IR  
 O:TEMP  
 S:VNT  
 E:VER  
 F:FF  
 R:GAIN

399.65 MHz  
 124.00 KHz  
 10000.00 Hz  
 28768  
 7993.90 Hz  
 32  
 4.0893 sec  
 2.9010 sec  
 6.90 uiso  
 25.8 C  
 CDCl<sub>3</sub>  
 0.00 ppm  
 0.12 Hz  
 7

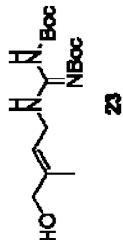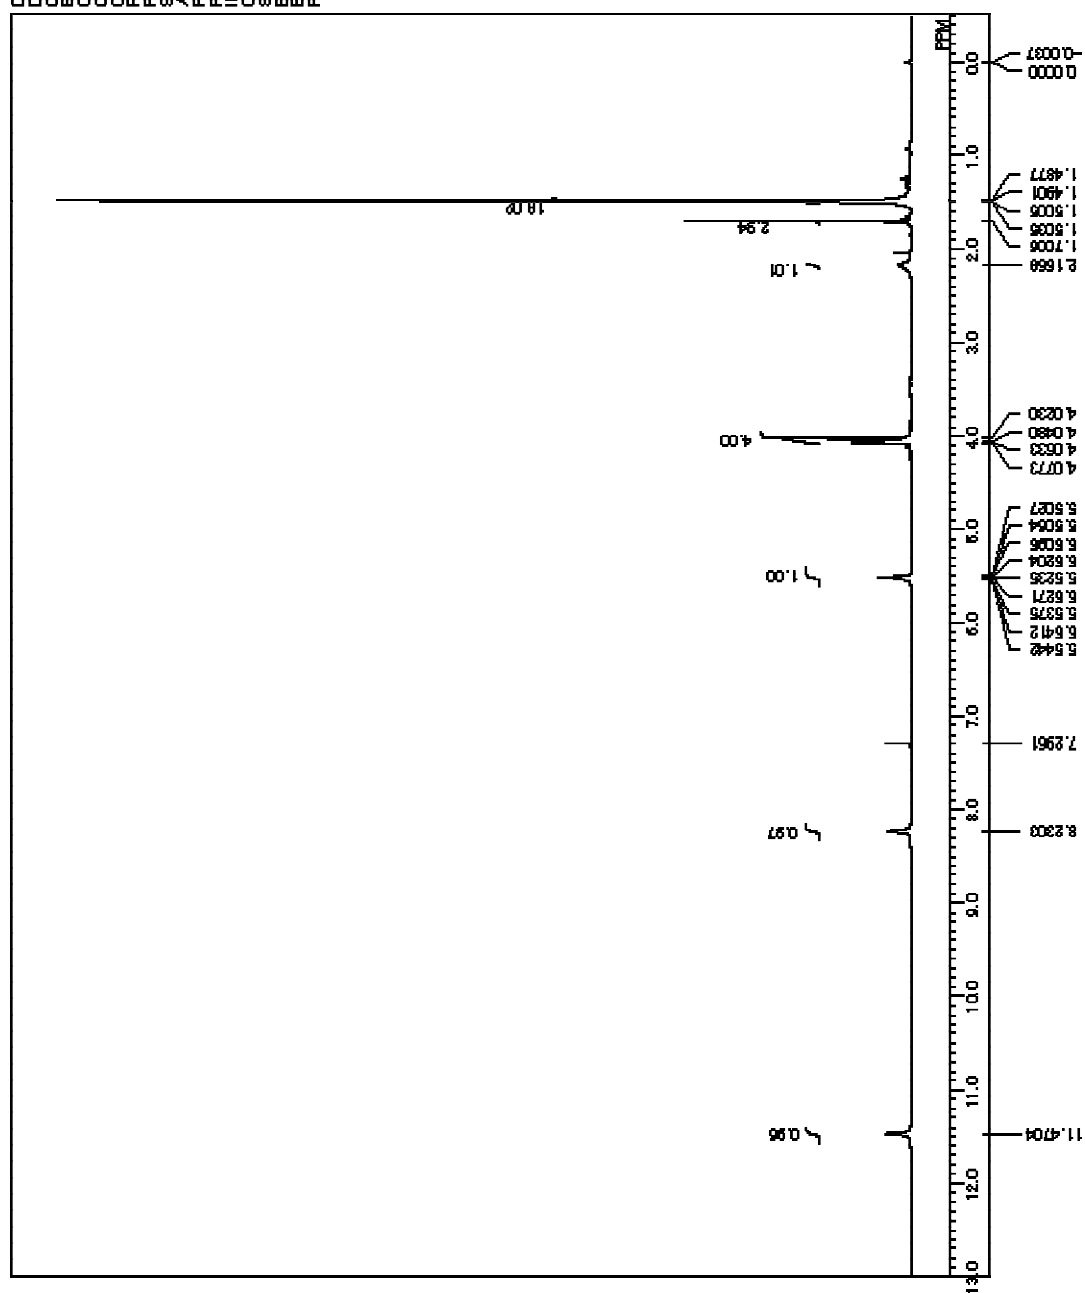

Fri Jan 20 13:44:02 2006  
D:\My Documents\個人\フタノイノノ\AL4006

DATEM  
DIRLE  
DENUM  
EXAMID  
OFFR  
OBSET  
OBFIN  
POINT  
FREQU  
SCANS  
ACQTM  
PD  
IRI  
OTEMP  
S.MNT  
EXREF  
EF  
RGAIN

93.45 MHz  
94.00 kHz  
10009.000 Hz  
22768  
22845.64 Hz  
64  
1.2206 sec  
1.7790 sec  
6.80 uiso  
25.2 c  
CDCL3  
77.00 ppm  
0.12 Hz  
24

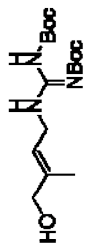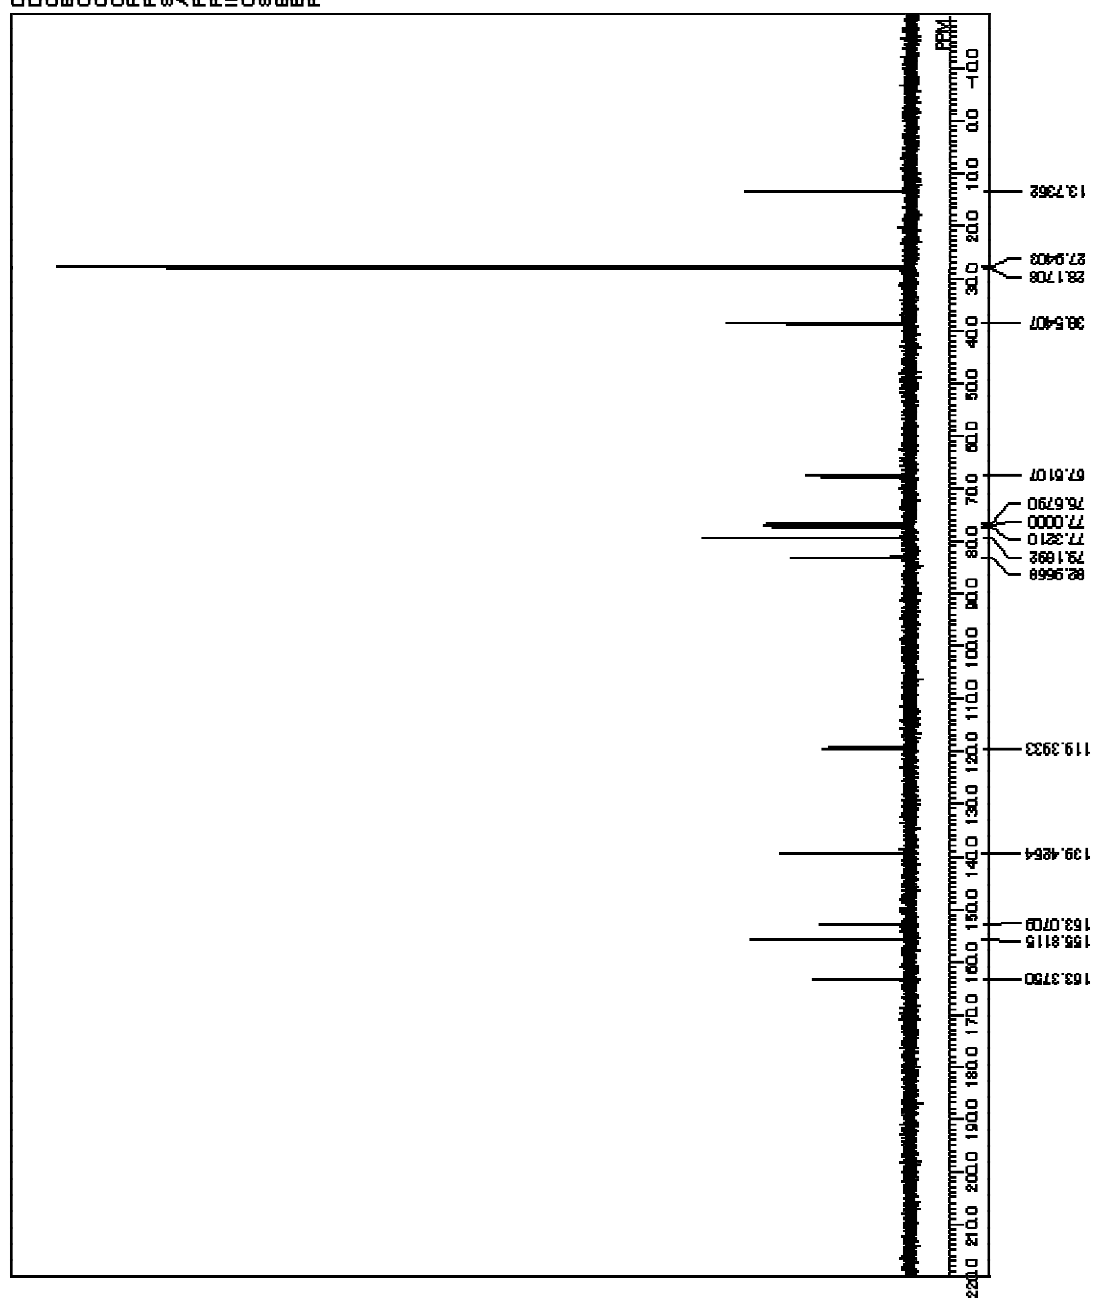



Wed Jul 26 16:13:14 2004  
C:\My Documents\77-1\1\NMR AL400M

D:ATM  
DRFILE  
ORNUC  
EXMOD  
OFPR  
OBSET  
OBFIN  
POINT  
FREQU  
SCANS  
ACQTM  
PD  
PWI  
IRN  
OTEMP  
SLVINT  
EXREF  
BF  
RGAIN

399.65 MHz  
124.00 KHz  
10500.00 Hz  
32768  
7993.60 Hz  
16  
4.093 sec  
2.9010 sec  
5.90 usec  
25.0 c  
CDCl3  
0.00 ppm  
0.12 Hz  
17

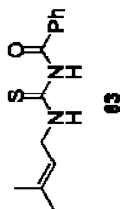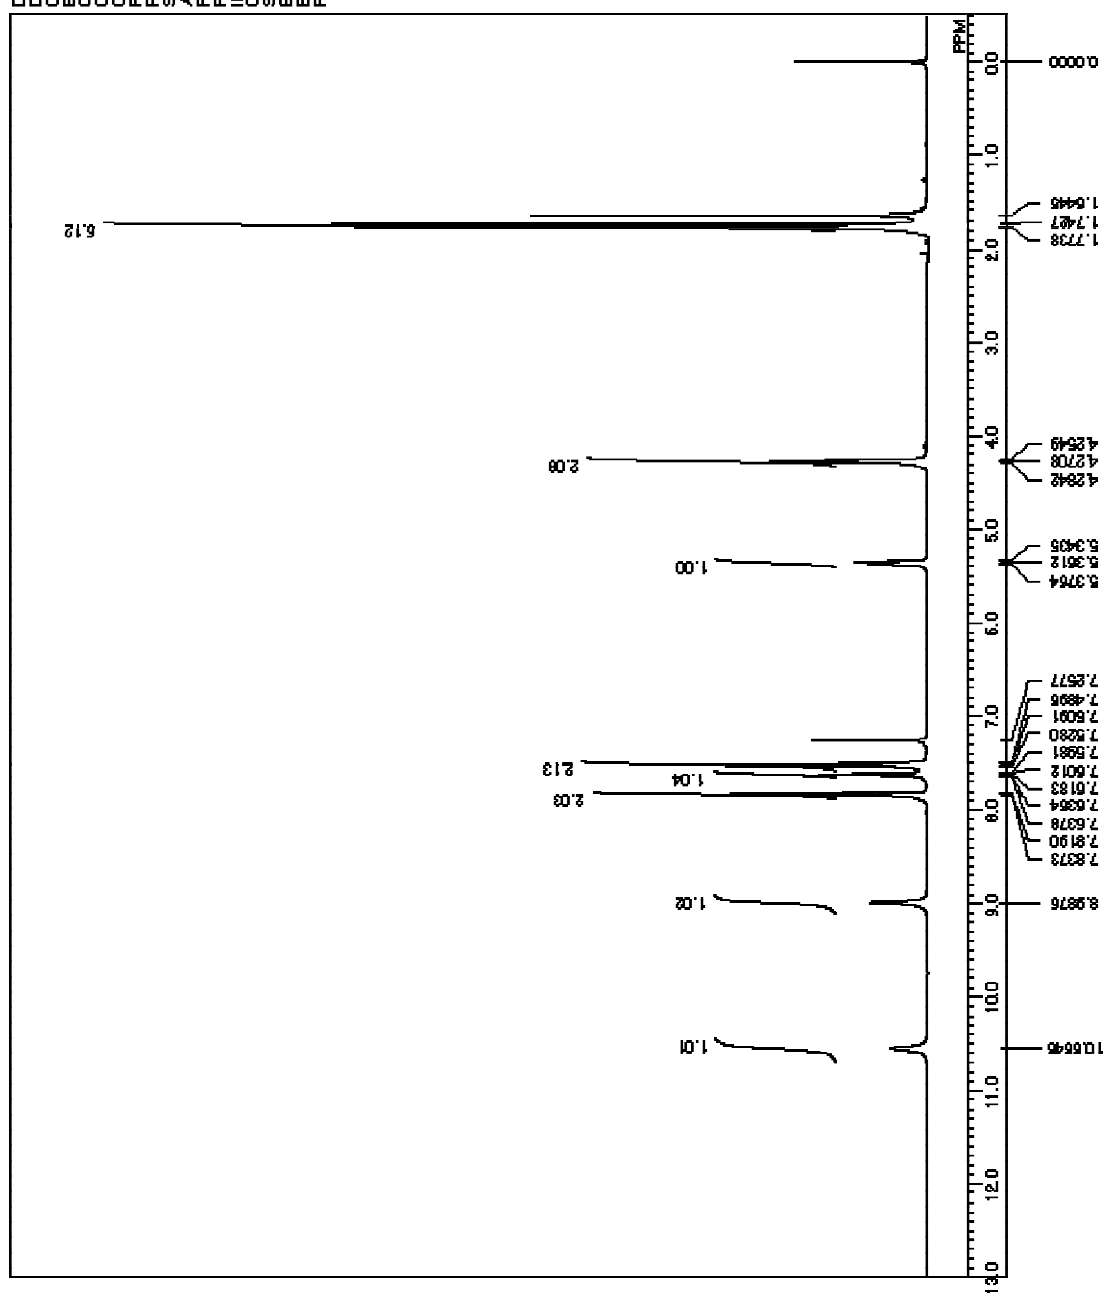

Fri Jan 20 22:10:46 2006  
C:\My Documents\人77-1\1NMR AL400M

DATE\_1M  
DRFILE  
ORNUC  
EXMOD  
OFPR  
OBSET  
OBFIN  
POINT  
FREQU  
SCANS  
ACQTIM  
PD  
PWI  
IRN  
OTEMP  
SLVINT  
EXREF  
BF  
RGAIN

94.46 MHz  
94.00 KHz  
10000.00 Hz  
32768  
26846.64 Hz  
165  
1.0206 sec  
1.7790 sec  
6.50 usec  
25.4 c  
CDCL3  
77.00 ppm  
0.12 Hz  
24

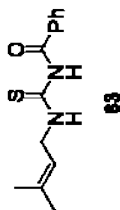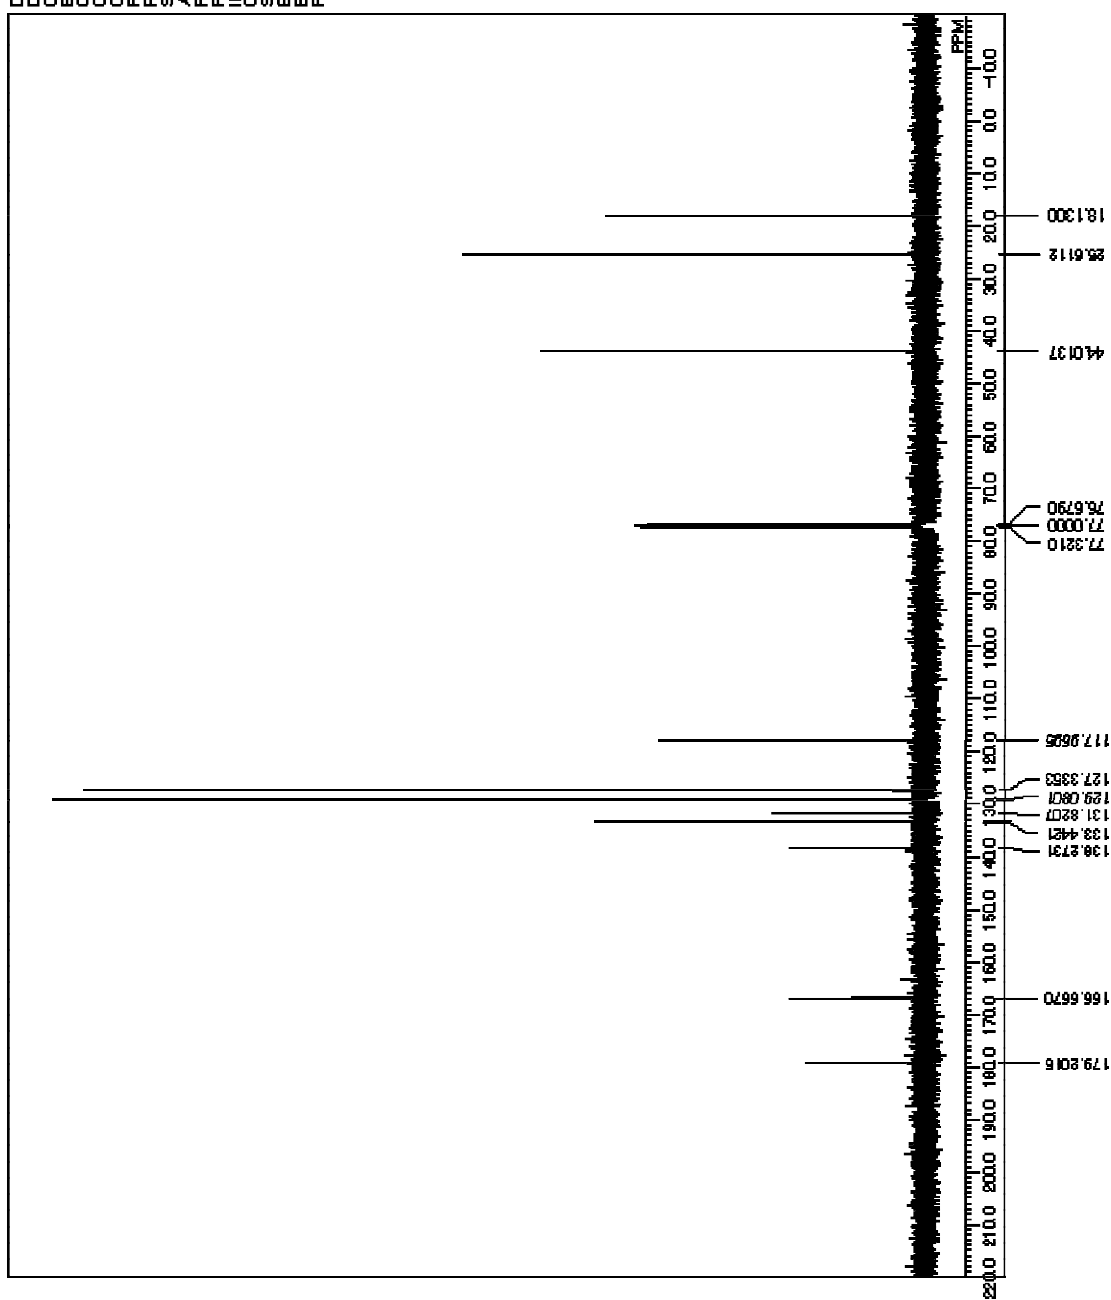

Wed Aug 01 13:25:05 2004  
C:\My Documents\177-1\1NMR AL400M

D:ATIM  
D:PRLE  
D:BNJC  
EXMOD  
D:FR  
D:BSST  
D:BFIN  
D:POINT  
D:FREQUL  
D:SCANS  
D:ACQTIM  
D:PD  
D:IRN  
D:ITEMP  
D:SLVINT  
D:EXREF  
D:BF  
D:RGAIN

399.65 MHz  
124.00 KHz  
10500.00 Hz  
32768  
7993.60 Hz  
16  
4.093 sec  
2.9010 sec  
5.90 usec  
25.3 c  
CDCL3  
0.00 ppm  
0.12 Hz  
8

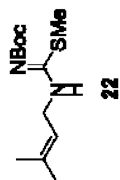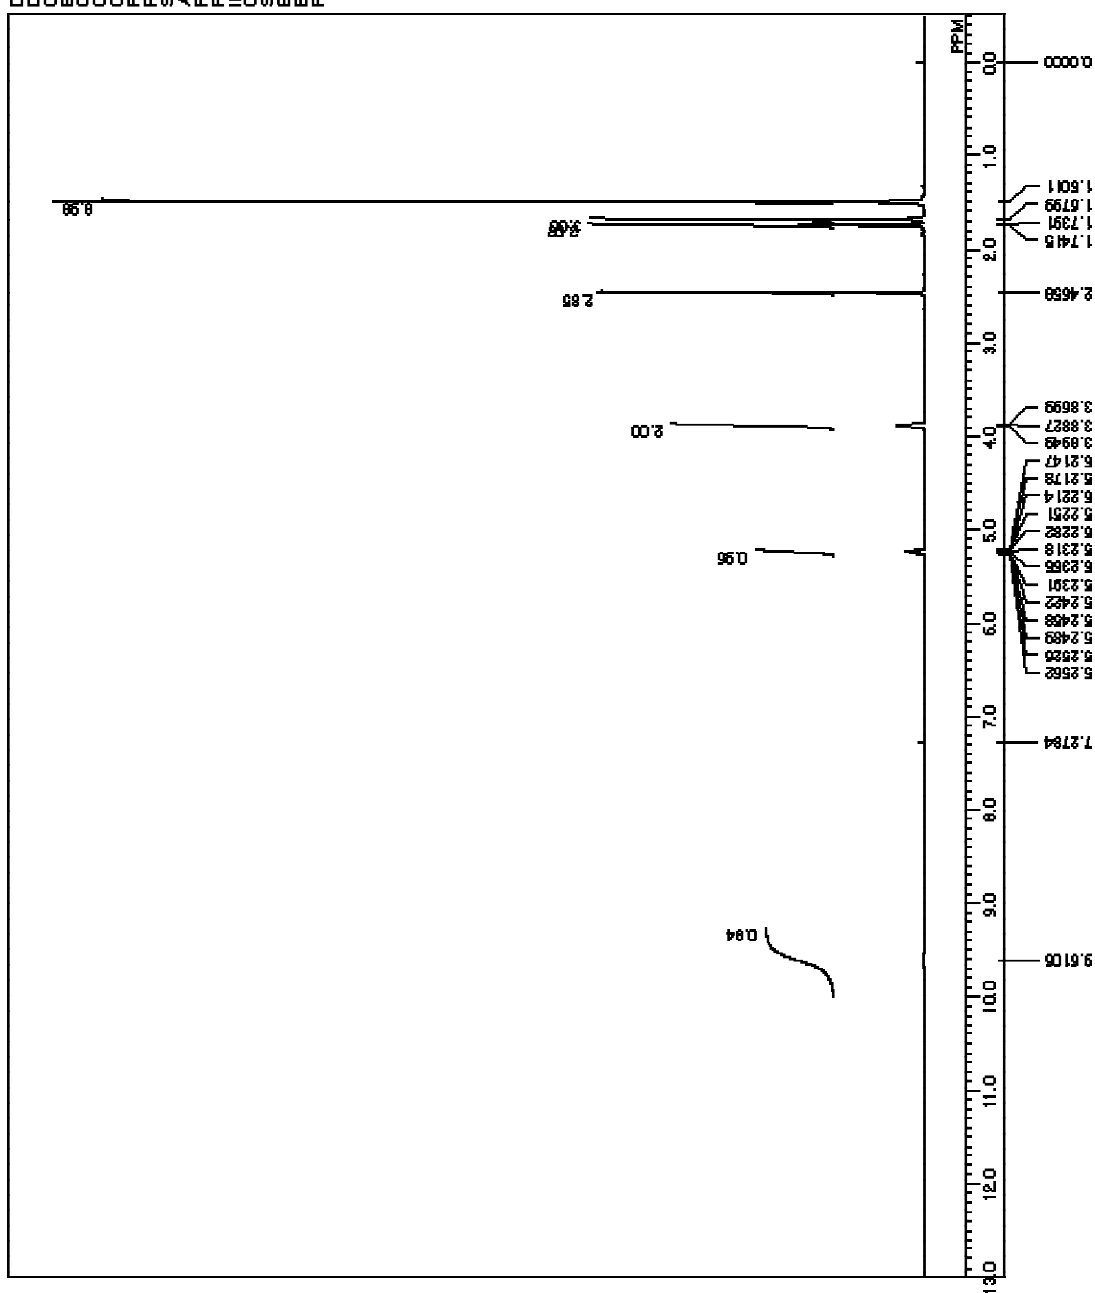

Fri Jan 20 21:52:19 2006  
C:\My Documents\77-1\NMR AL400M

D:ATIM  
DPRLE  
D8NJUC  
EXMOD  
DPR  
D8SET  
D8FIN  
POINT  
FREQU  
SCANS  
ACQTIM  
PD  
PWI  
IRN  
OTEMP  
SLVNT  
EXREF  
BF  
RGAIN

50.46 MHz  
94.00 KHz  
1000.00 Hz  
32768  
98846.64 Hz  
86  
1.0206 sec  
1.7790 sec  
6.50 usec  
25.5 c  
CDCL3  
77.00 ppm  
0.12 Hz  
23

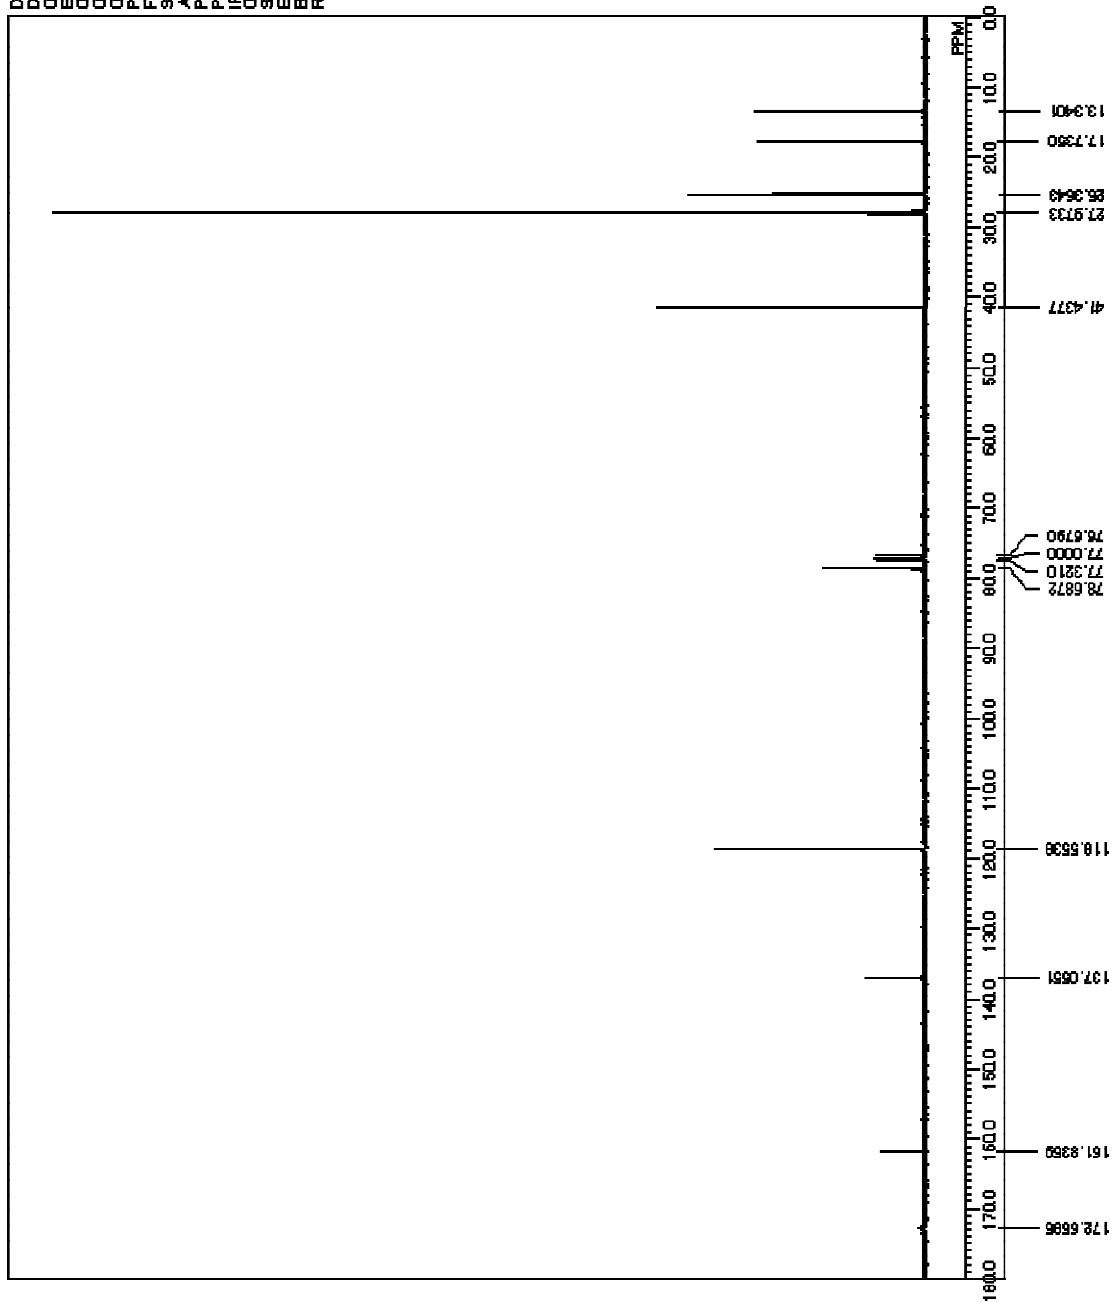



Set 0 of 22 08:55:06 2005  
 C:\My Documents\77-1\NMR AL400M

D:ATM  
 D:FILE  
 D:NAME  
 EXMID  
 OFR  
 O:BSF  
 O:BFIN  
 POINT  
 FREQU  
 SCANS  
 ACQ:TM  
 PD  
 PW1  
 IRN  
 O:TEMP  
 SL:VINT  
 EX:REF  
 BF  
 RGAIN

100.40 MHz  
 125.00 KHz  
 10500.00 Hz  
 32768  
 27173.80 Hz  
 1101  
 1.2069 sec  
 1.7940 sec  
 5.90 usec  
 24.0 c  
 0.00 ppm  
 0.12 Hz  
 24

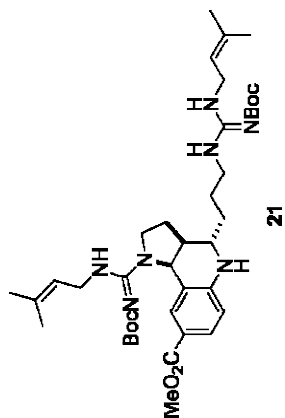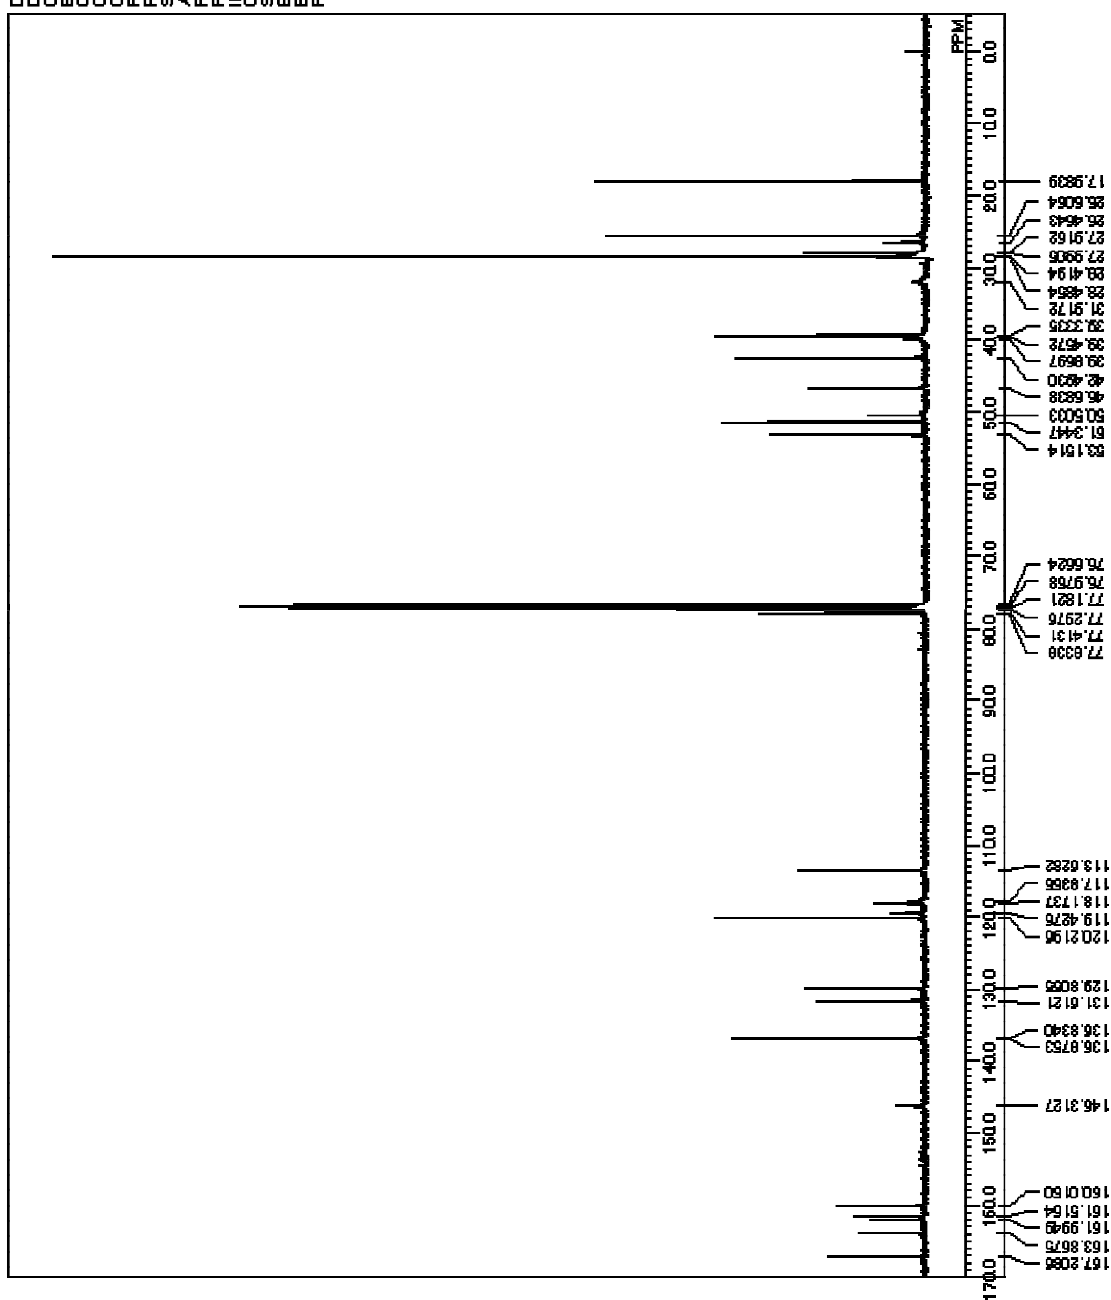



CMVMy Documents\個人ファイル\1H NMR ALD\06\06chuanf244-1.sls

CMVMy Documents\個人ファイル\1H NMR ALD\06\06chuanf244-1.sls

DEFILE  
 CDUMNT  
 DATIM 24-04-2006 19:02:44  
 DEBNUC 13C  
 EXMODE smeta\_pulse\_dec  
 EXFREQ 149.41 MHz  
 OBSFREQ 9.23 MHz  
 OBSRES 6.35 Hz  
 POINT 26814  
 FREQNUC 37653.41 Hz  
 SCANS 27235  
 SOLVENT 0.6573 sec  
 PD 2.000 sec  
 ADJUSTM 3.47 ussec  
 PULPROG 1H  
 IRNUC 13C  
 CTMP 25.0 C  
 SLVMT DMSO  
 EXREF 39.60 ppm  
 DE 2.00 Hz  
 REAIN 08

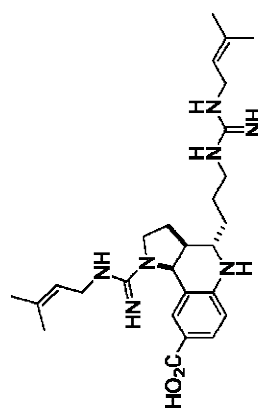

Martinelic acid (1)

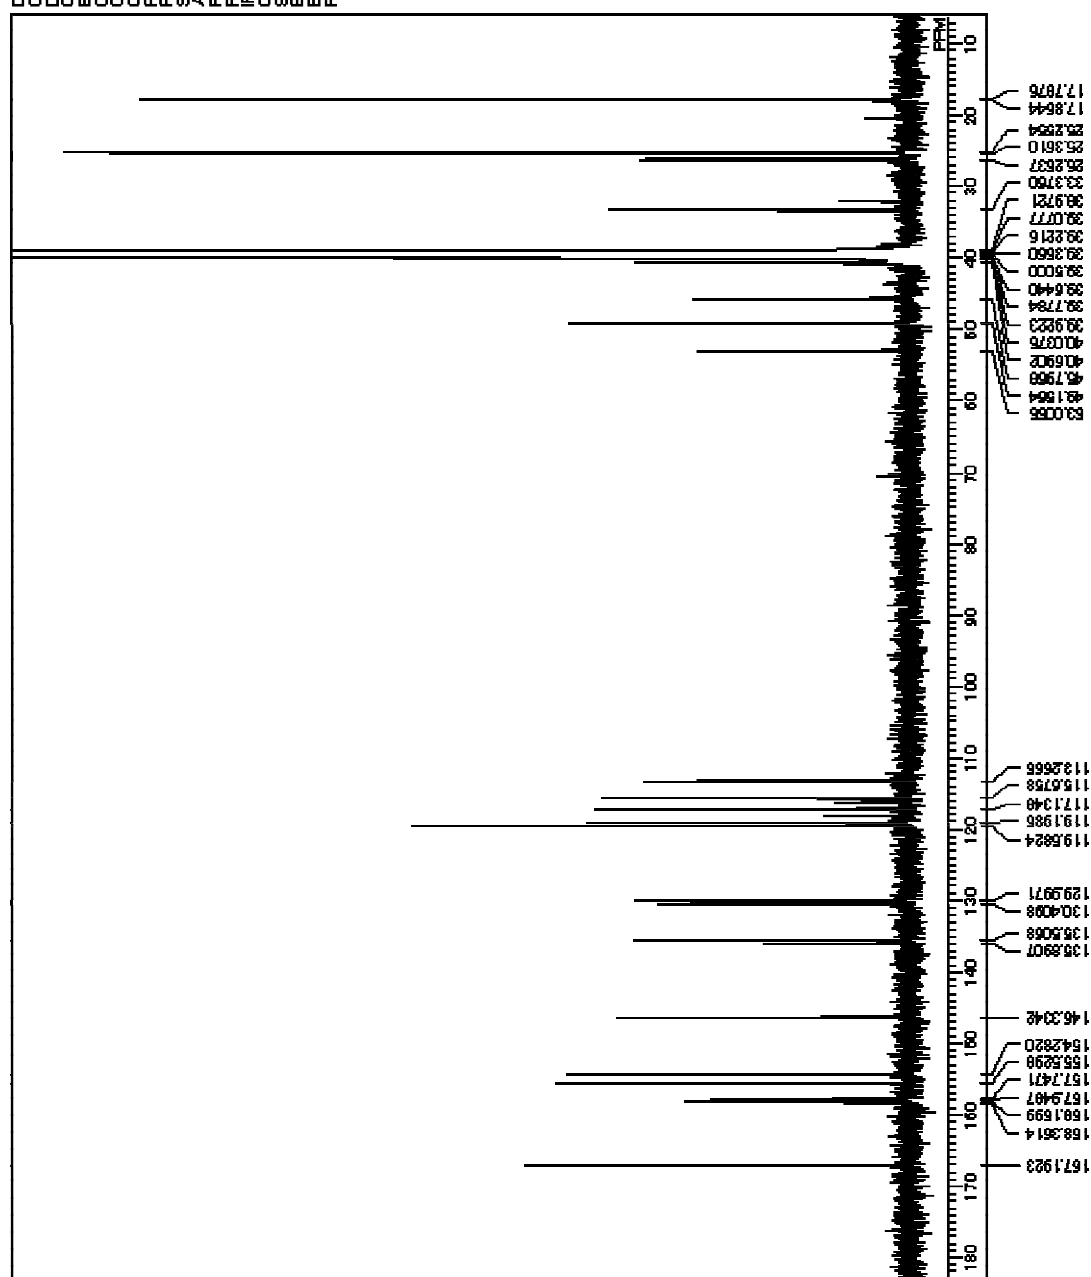



Tue Oct 25 23:47:53 2005  
 C:\My Documents\個人ファイル\NMR\AL400F\

DATIM  
 DFILE  
 OBNUC  
 EXMOD  
 OFR  
 OBSET  
 OFBIN  
 POINT  
 FREQU  
 SCANS  
 ACQTM  
 PD  
 PW1  
 IRN  
 CTEMP  
 SLVNT  
 EXREF  
 BF  
 RGAIN

399.65 MHz  
 124.00 KHz  
 10500.00 Hz  
 32768  
 32  
 4.0993 sec  
 2.9010 sec  
 5.90 usec  
 24.0 c  
 CDCL3  
 0.00 ppm  
 0.12 Hz  
 14

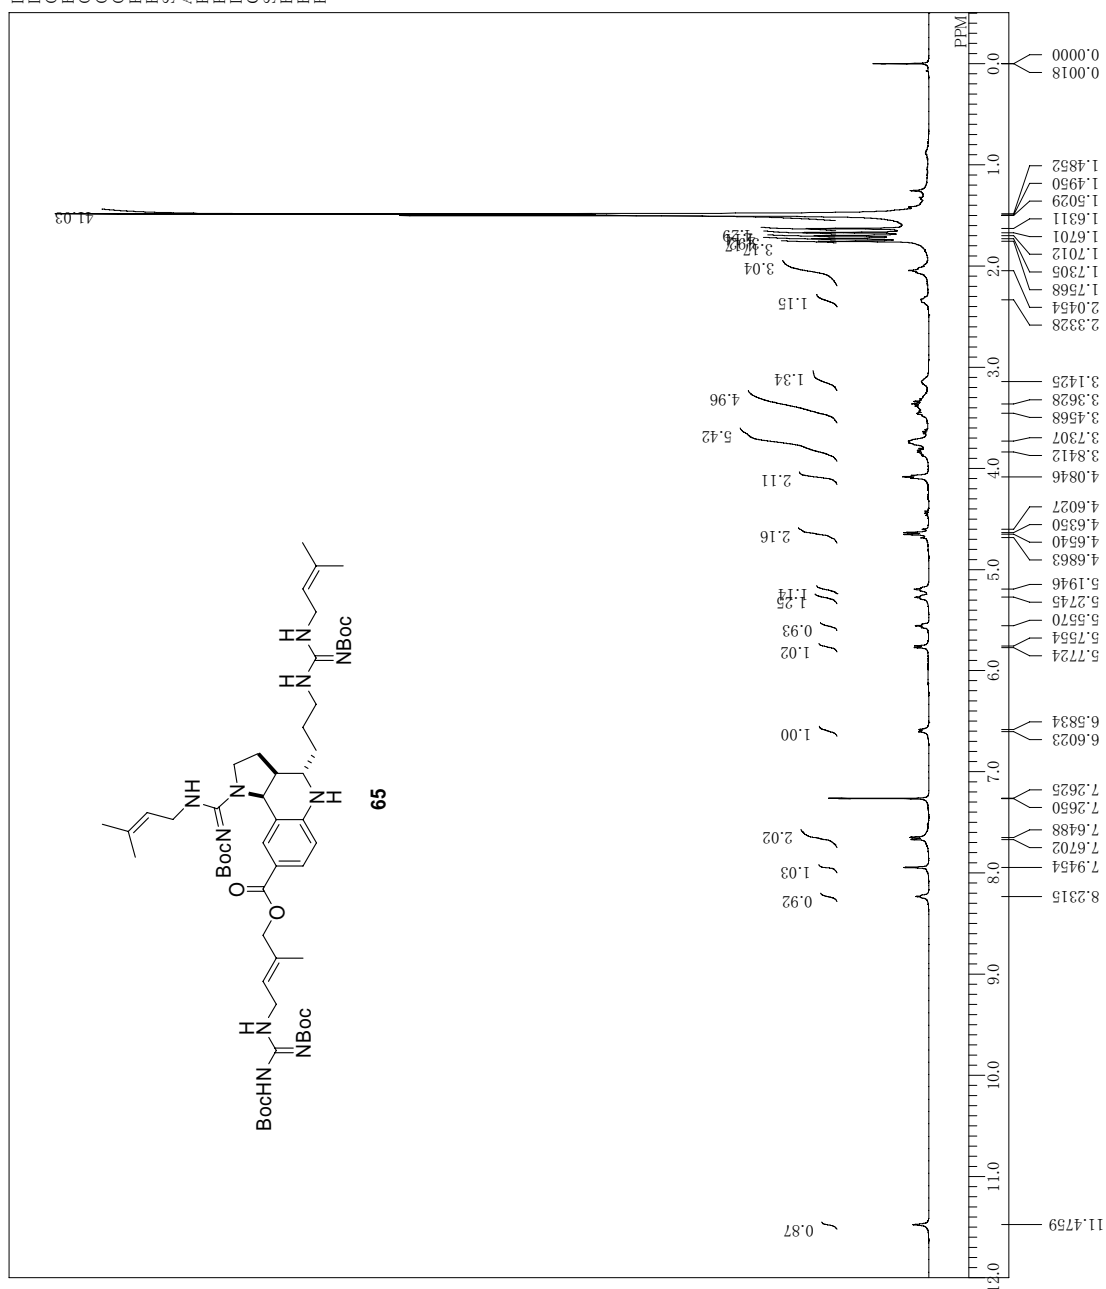

C:\My Documents\外国人フアイル\NMR AL400X池E

DFILE  
COMNT  
DATIM  
ORNUC  
EXMOD  
OBFREQ  
OBSECT  
OBFIL  
POINT  
FREQU  
SCANS  
ACQTM  
PD  
PWI  
IRNUC  
CTEMP  
SLVNT  
EXREF  
BF  
RGAIN

Wed Oct 26 08:58:06 2005

13C  
BCM  
100.40 MHz  
125.00 KHz  
105000.00 Hz  
32768  
27173.90 Hz  
10883  
1.2059 sec  
1.7940 sec  
5.90 usec  
1H  
240 c  
CDCL3  
0.00 ppm  
0.12 Hz  
22

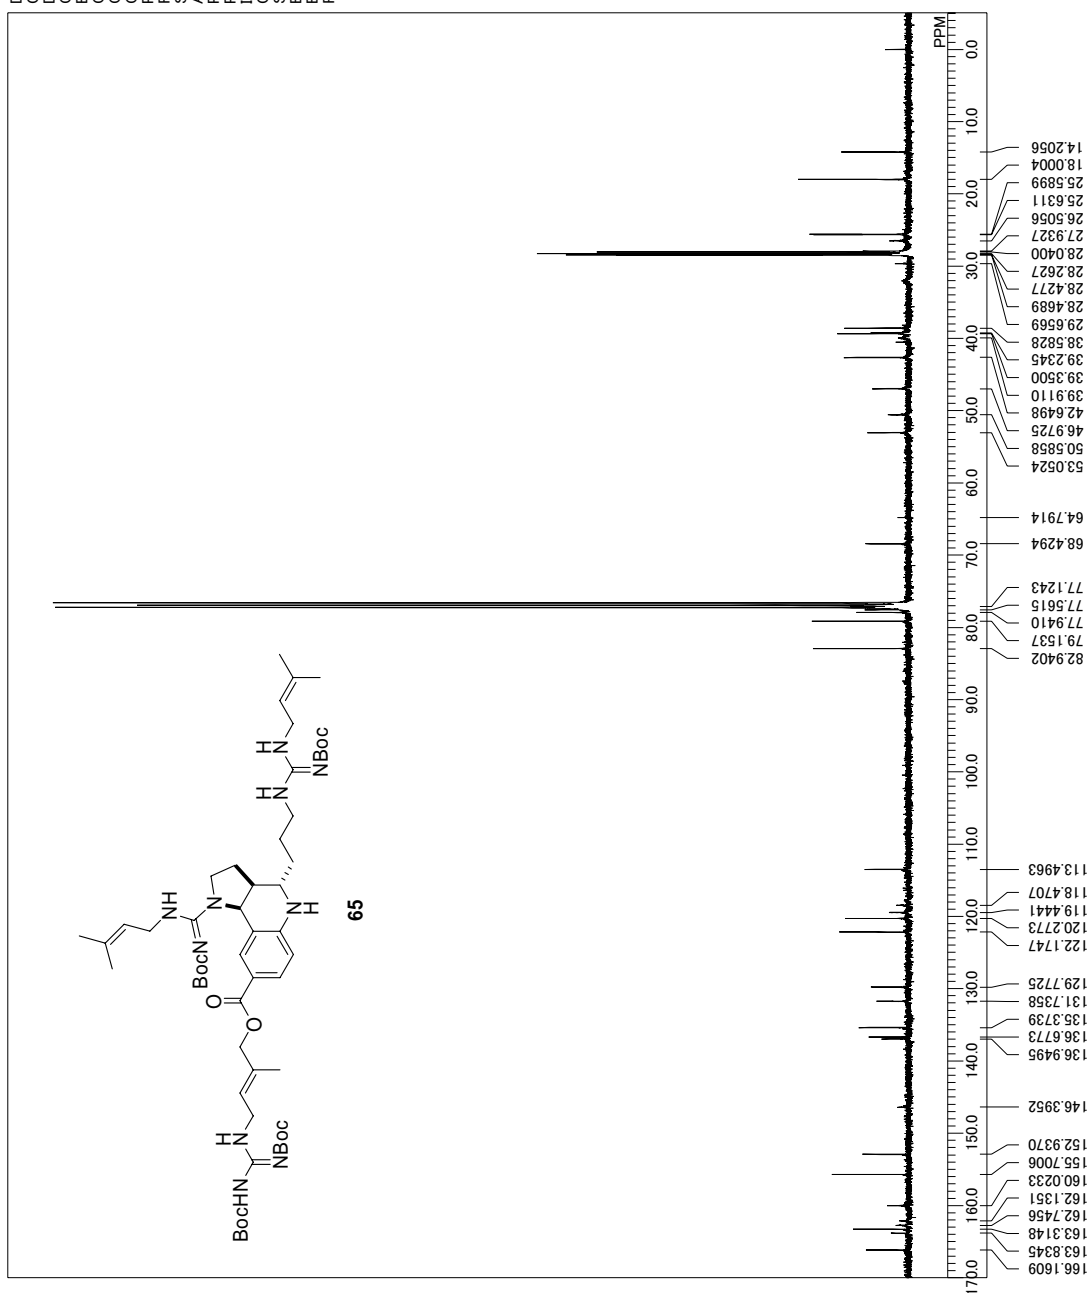

C:\My Documents\個人ファイル\1H NMR AL400\池

DFILE  
COMNT  
DATIM  
DORNUC  
EXMOD  
OBERO  
OSET  
OBRIN  
POINT  
FREQU  
SCANS  
ACQTM  
PD  
PWI  
IRNUC  
CTEMP  
SLVNT  
EXREF  
BF  
RGAIN

single\_pulse  
04-02-2006 14:32:47  
1H  
single\_pulse ex2  
600.17 MHz  
5.30 KHz  
5.47 Hz  
13.06  
9008.87 Hz  
256  
1.4549 sec  
5.0000 sec  
6.75 usec  
1H  
25.3 c  
DMSO  
0.00 ppm  
0.12 Hz  
48

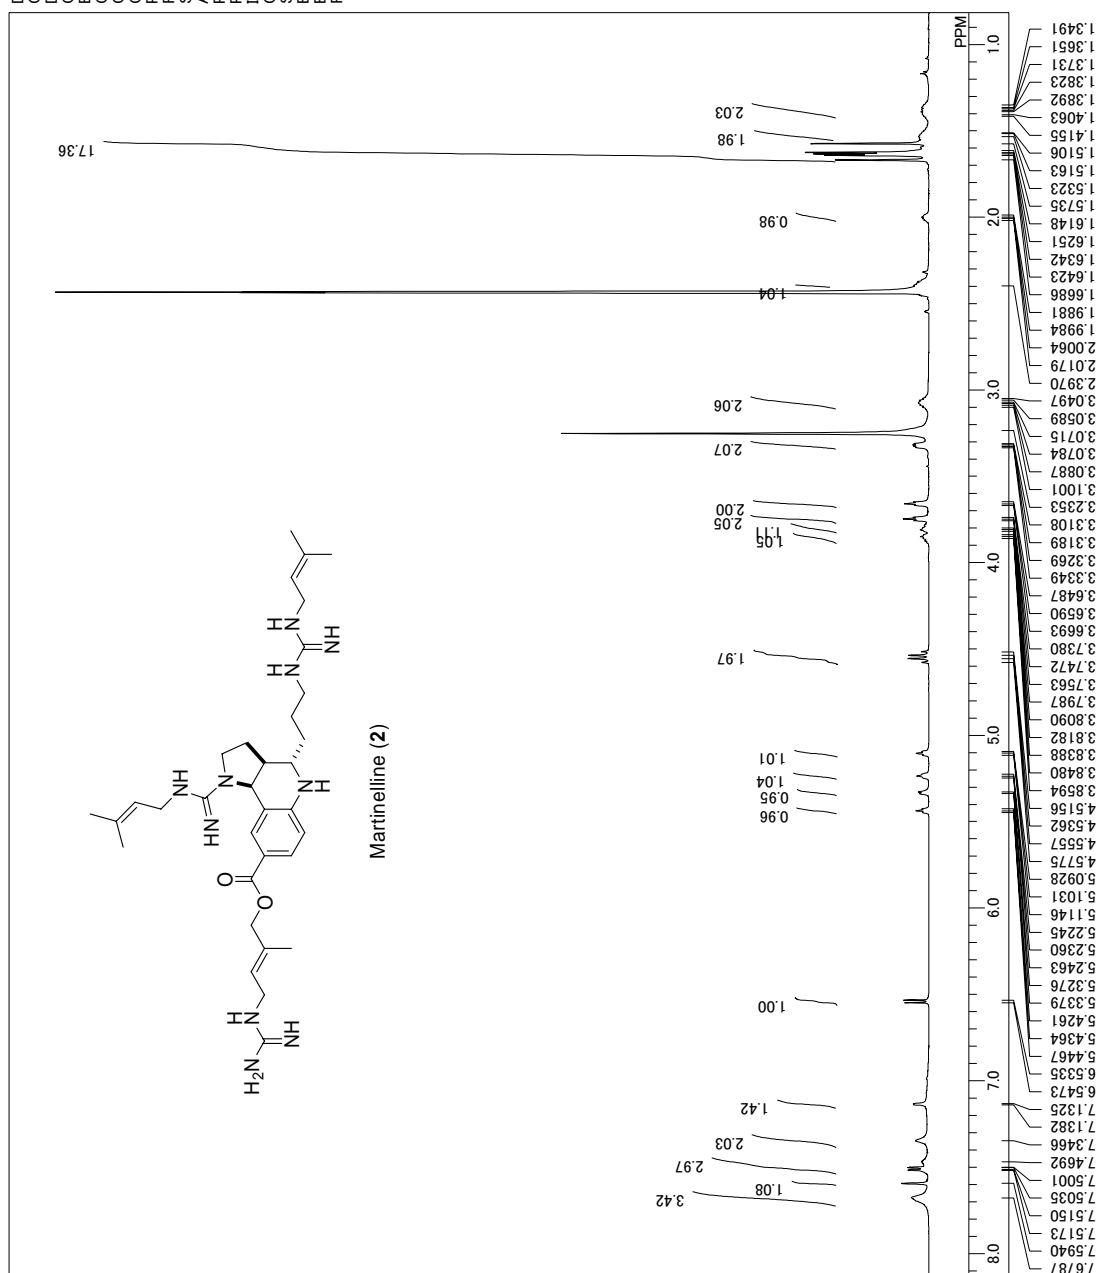

C:\My Documents\個人ファイル\NMR AL400\池  
06-02-2006 08:13:11  
single pulse decoupled gated NOE

DFILE  
COMNT  
DATIM  
OBNUC  
EXMOD  
OBFREQ  
OBSSET  
OBSF1  
POINT  
FREQU  
SCANS  
ACQTM  
PD  
PWI  
IRNUC  
CTEMP  
SLVNT  
EXREF  
BF  
RGAIN

13C  
single pulse dec  
150.92 MHz  
9.52 KHz  
1.74 Hz  
26213  
37878.21 Hz  
55000  
0.6921 sec  
2.0000 sec  
3.57 usec  
1H  
26.4 c  
DMSO  
39.50 ppm  
0.12 Hz  
60

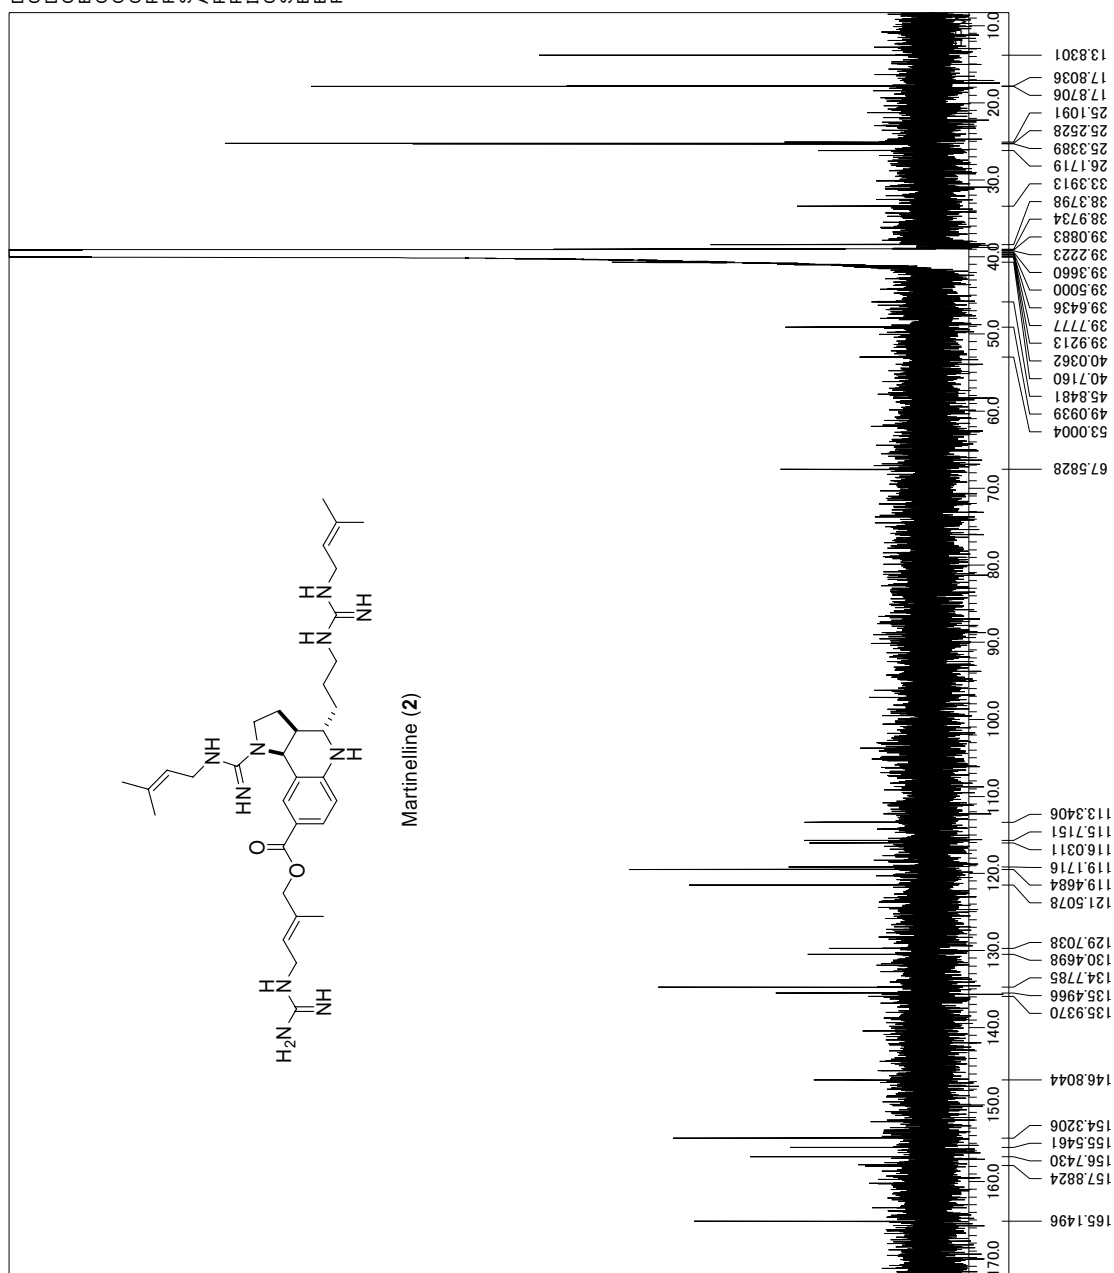

Supplement: b611121a-pt2.pdf [file b611121a-pt2.pdf]
